# Supplementary material for: Benchmarking nitrous oxide adsorption and activation in metal–organic frameworks bearing coordinatively unsaturated metal centers
Source: Royal Society of Chemistry journal article supplement (doi:10.1039/d3tc04492k), 2024-01-01
Supplement: d3tc04492k2.pdf [file d3tc04492k2.pdf]

## Benchmarking Nitrous Oxide Adsorption and Activation in Metal-Organic Frameworks Bearing Coordinatively Unsaturated Metal Centers

Tristan A. Pitt,<sup>a</sup> Haojun Jia,<sup>b,c</sup> Tyler J. Azbell,<sup>a</sup> Mary E. Zick,<sup>a</sup> Aditya Nandy,<sup>b,c</sup> Heather J. Kulik,<sup>b,c</sup> Phillip J. Milner<sup>a,\*</sup>

<sup>a</sup>Department of Chemistry and Chemical Biology, Cornell University, Ithaca, NY, 14850, United States

<sup>b</sup>Department of Chemical Engineering, Massachusetts Institute of Technology, Cambridge, MA, 02139, United States

<sup>c</sup>Department of Chemistry, Massachusetts Institute of Technology, Cambridge, MA, 02139, United States

\*pjm347@cornell.edu

### Supporting Information

#### Table of Contents

|                                                                                                           |    |
|-----------------------------------------------------------------------------------------------------------|----|
| 1. General procedures.....                                                                                | 2  |
| 2. Synthesis and characterization of H <sub>2</sub> btdd. ....                                            | 4  |
| 3. Synthesis, characterization, and gas sorption analysis of Mn <sub>2</sub> Cl <sub>2</sub> (btdd). .... | 6  |
| 4. Synthesis, characterization, and gas sorption analysis of Co <sub>2</sub> Cl <sub>2</sub> (btdd). .... | 10 |
| 5. Synthesis, characterization, and gas sorption analysis of Ni <sub>2</sub> Cl <sub>2</sub> (btdd). .... | 15 |
| 6. Synthesis, characterization, and gas sorption analysis of Cu <sub>2</sub> Cl <sub>2</sub> (btdd). .... | 20 |
| 7. Synthesis, characterization, and gas sorption analysis of Mg <sub>2</sub> (dobdc). ....                | 24 |
| 8. Synthesis, characterization, and gas sorption analysis of Mn <sub>2</sub> (dobdc). ....                | 28 |
| 9. Synthesis, characterization, and gas sorption analysis of Fe <sub>2</sub> (dobdc). ....                | 33 |
| 10. Synthesis, characterization, and gas sorption analysis of Co <sub>2</sub> (dobdc). ....               | 38 |
| 11. Synthesis, characterization, and gas sorption analysis of Ni <sub>2</sub> (dobdc). ....               | 42 |
| 12. Synthesis, characterization, and gas sorption analysis of Cu <sub>2</sub> (dobdc). ....               | 46 |
| 13. Synthesis, characterization, and gas sorption analysis of Zn <sub>2</sub> (dobdc). ....               | 50 |
| 14. Computational studies. ....                                                                           | 54 |
| 15. High-temperature N <sub>2</sub> O studies in Mn <sub>2</sub> (dobdc). ....                            | 59 |
| 16. References .....                                                                                      | 66 |

## 1. General procedures

All reagents were purchased from commercial vendors and used without further purification unless specified otherwise. The solvents ethanol (EtOH, Fisher, ACS Grade), diethyl ether (Et<sub>2</sub>O, Fischer, 99%), glacial acetic acid (HOAc, Fisher, ACS Grade), methanol (MeOH, Fisher, ACS Grade), *N,N*-dimethylformamide (DMF, Fisher, ACS Grade), and isopropanol (*i*PrOH, Fisher, ACS Grade) were purchased from commercial vendors. Dry, degassed solvents were obtained in SureSeal bottles and stored over 3 Å sieves or were obtained by sparging with Ar for 30 min and then passing the solvent through two columns of activated alumina using a JC Meyer solvent system. All dry, degassed solvents were stored over 3 Å sieves in an N<sub>2</sub>-filled glovebox when not in use. The reagents trifluoroacetic anhydride (TFAA, AESAR, 99%), fuming nitric acid (HNO<sub>3</sub>, VWR, ACS Grade), dibenzo-1,4-dioxin, 37% hydrochloric acid (conc. HCl, J.T. Baker, ACS Grade), tin powder (AESAR, 99.5%), sodium nitrite (NaNO<sub>2</sub>, AESAR, ACS Grade), 2,5-dihydroxyterephthalic acid (H<sub>4</sub>dobdc, Astatech, 95%), Mg(NO<sub>3</sub>)<sub>2</sub>·6H<sub>2</sub>O (Beantown, 98%), MnCl<sub>2</sub>·4H<sub>2</sub>O (Fisher, 98%), anhydrous FeCl<sub>2</sub> (AESAR, 98%), Co(NO<sub>3</sub>)<sub>2</sub>·6H<sub>2</sub>O (Aldrich, 98%), Ni(NO<sub>3</sub>)<sub>2</sub>·6H<sub>2</sub>O (Acros, 98%), Cu(NO<sub>3</sub>)<sub>2</sub>·6H<sub>2</sub>O, Zn(NO<sub>3</sub>)<sub>2</sub>·6H<sub>2</sub>O (Lancaster, 99%), CoCl<sub>2</sub>·6H<sub>2</sub>O (Aldon, Reagent Grade), NiCl<sub>2</sub>·6H<sub>2</sub>O (Acros, 99.95%), and CuCl<sub>2</sub>·2H<sub>2</sub>O (Aldrich, ACS Grade) were purchased from commercial vendors. Deuterated dimethyl sulfoxide (DMSO-d<sub>6</sub>, 99%) was purchased from Cambridge Isotope Laboratories. Cylinders of N<sub>2</sub> (Ultra High Purity, 99.999%) and N<sub>2</sub>O (UHP 4, 99.99%) were purchased from Airgas.

Powder X-ray diffraction (PXRD) patterns were collected on a Rigaku Ultima IV diffractometer equipped with a Cu K<sub>α</sub> source ( $\lambda = 1.54 \text{ \AA}$ ) and were baseline-corrected using OriginPro. Diffraction data on air-sensitive samples were collected by packing a small amount of material (5–10 mg) into a glass capillary (1.0 mm outer diameter, Charles Supper) in a N<sub>2</sub>-filled glovebox and sealed under N<sub>2</sub> using a large plug of silicon grease. The effect of the sample preparation on the peak profiles and 2 $\theta$  positions of sample reflections relative to a uniform flattened powder sample was modeled using Mg<sub>2</sub>(dobdc) (Figure S1) and on that basis a value of 0.22 ° 2 $\theta$  was uniformly subtracted from the data collected in capillaries to account for the artificial shift to higher angles caused by the sample preparation. NMR data were collected on a Bruker INOVA 500 MHz spectrometer and are referenced to residual solvent. Infrared (IR) spectra were collected on a Bruker Tensor II IR spectrometer equipped with a diamond Attenuated Total Reflectance (ATR) attachment. Variable temperature diffuse reflectance infrared Fourier transform spectroscopy (DRIFTS) spectra were collected on a Bruker Tensor II IR spectrometer with a Harrick Praying Mantis attachment. Magnetic susceptibility measurements were performed using a Quantum Design MPMS3 superconducting quantum interference device (SQUID) magnetometer under an applied magnetic field of 1000 Oe. Moment vs. field measurements were performed using a Quantum Design Dynacool Physical Property Measurement System (PPMS) at 5 K and the field was swept from –9 T to 9 T at a rate of 200 Oe per second. In all cases, powder samples were loaded into plastic sample holders in a N<sub>2</sub>-filled glovebox.

Surface area data were collected on a Micromeritics ASAP 2020 gas sorption analyzer using Ultra High Purity N<sub>2</sub> (99.999%) and a liquid N<sub>2</sub> bath. N<sub>2</sub>O adsorption data were fit using the dual-

site Langmuir-Freundlich model (eq. S1), where  $Q(P)$  is the predicted uptake  $Q$  at pressure  $P$  in mmol/g,  $Q_{sat,i}$  is the saturation pressure of binding site  $i$  in mmol/g,  $b_i$  is the Langmuir parameter of site  $i$ ,  $v_i$  is the Freundlich parameter of site  $i$ ,  $-S_i$  is the entropy of binding site  $i$  in J/mol·K,  $R$  is the ideal gas constant,  $E_i$  is the enthalpy of adsorption for binding site  $i$  in kJ/mol, and  $T$  is the temperature in K. The isotherms were fit with  $v_1$  and  $v_2$  allowed to vary freely (dual-site Langmuir-Freundlich model). Fits were obtained using Solver in Microsoft Excel.

$$Q(P) = \frac{Q_{sat1}(b_1P)^{v_1}}{1+(b_1P)^{v_1}} + \frac{Q_{sat2}(b_2P)^{v_2}}{1+(b_2P)^{v_2}}; b_i = e^{\left(\frac{-S_i}{R}\right)\left(\frac{1000 \cdot E_i}{RT}\right)} \quad \text{eq. S1}$$

Heats of adsorption ( $-\Delta H_{ads}$ ) values were calculated using the Clausius-Clapeyron equation (eq. S2), where  $P_Q$  are pressure values corresponding to the same loading  $Q$ ,  $\Delta H_{ads}$  is the differential enthalpy of adsorption in kJ/mol,  $R$  is the ideal gas constant,  $T$  is the temperature in K, and  $c$  is a constant. Fits over a range of  $Q$  values were obtained using Mathematica to calculate the differential enthalpies of adsorption ( $\Delta H_{ads}$ ) based on the slopes of the linear trendlines fit to  $\ln(P_Q)$  vs  $1/T$  at constant values of  $Q$ .

$$\ln(P_Q) = \left(\frac{\Delta H_{ads}}{R}\right)\left(\frac{1}{T}\right) + c \quad \text{eq. S2}$$

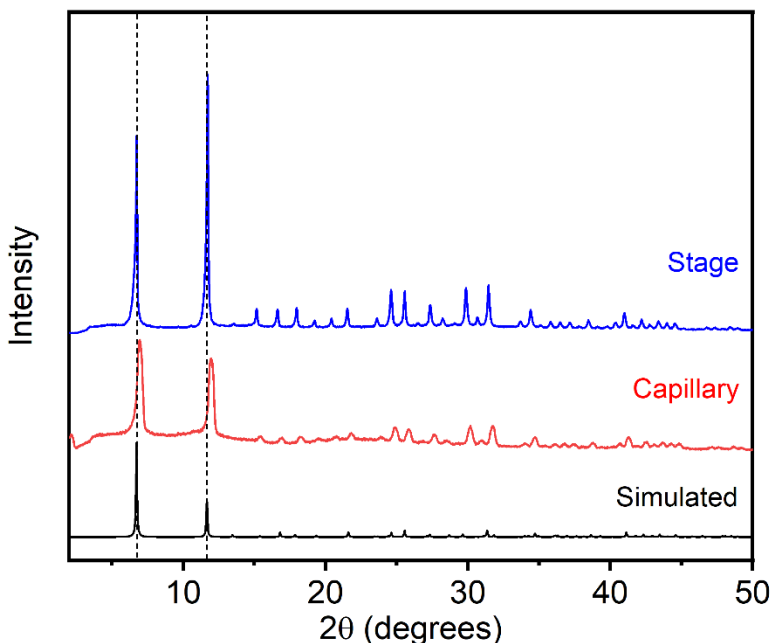

**Figure S1.** PXRD ( $\lambda = 1.54 \text{ \AA}$ ) patterns of identical  $\text{Mg}_2(\text{dobdc})$  samples prepared in a capillary (red) or as a uniform flattened layer (blue). The simulated pattern (black) based on the single-crystal X-ray diffraction (SCXRD) structure of the isostructural MOF  $\text{Zn}_2(\text{dobdc})$  is included for reference.<sup>1</sup>

## 2. Synthesis and characterization of H2btdd.

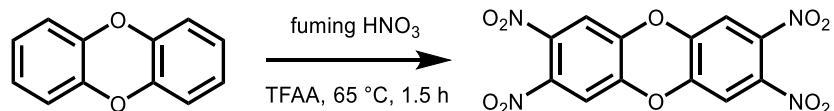

This procedure is adapted from the literature.<sup>2</sup> A 50 mL round bottom flask equipped with a stir bar and reflux condenser was cooled to 0 °C using an ice water bath. Trifluoroacetic anhydride (3.6 mL) was added slowly at 0 °C, followed by fuming nitric acid (4.5 mL). Next, dibenzo-1,4-dioxin (1.09 g, 5.92 mmol, 1.00 equiv.) was added in portions over 10 min with vigorous stirring. The reaction mixture was allowed to warm to room temperature and then stirred at 65 °C for 1.5 h. The reaction mixture was allowed to cool to room temperature and then poured into cold H<sub>2</sub>O (100 mL). The heterogeneous mixture was filtered, and the resulting solid was rinsed with H<sub>2</sub>O (100 mL). Drying under vacuum for 12 h yielded 2,3,7,8-tetranitrodibenzo-1,4-dioxin (1.83 g, 85%) as a bright yellow solid. <sup>1</sup>H NMR (500 MHz, DMSO-*d*<sub>6</sub>): δ 8.03 (s, 4H) ppm. This spectrum is consistent with that reported in the literature.<sup>2</sup>

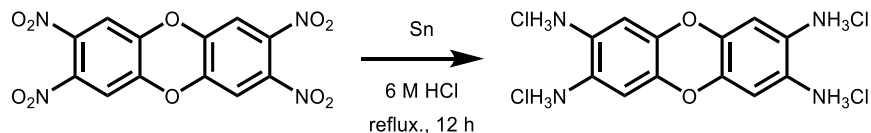

This procedure is adapted from the literature.<sup>3</sup> A 250 mL round bottom flask equipped with a stir bar and reflux condenser was charged with 2,3,7,8-tetranitrodibenzo-1,4-dioxin (1.83 g, 5.02 mmol, 1.00 equiv.) and 6 M HCl (44 mL). Sn powder (7.52 g, 63.7 mmol, 12.7 equiv.) was added in portions over 10 min with vigorous stirring. The reaction mixture was stirred for 30 min at room temperature and then heated to reflux for 12 h with stirring. The reaction mixture was allowed to cool to room temperature and filtered. The resulting solid was rinsed with 6 M HCl (100 mL), EtOH (100 mL), and Et<sub>2</sub>O (100 mL). Drying under vacuum for 12 h yielded dibenzo-1,4-dioxin-2,3,7,8-tetraamine hydrochloride (3.91 g, 78%) as a green solid. <sup>1</sup>H NMR (500 MHz, DMSO-*d*<sub>6</sub>): δ 6.61 (bs, 4H) ppm. This spectrum is consistent with that reported in the literature.<sup>3</sup>

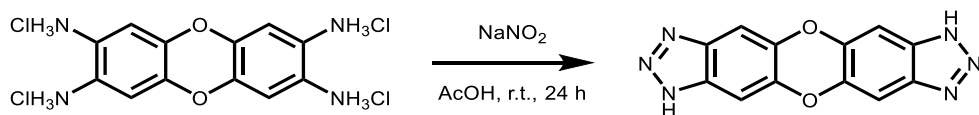

This procedure is adapted from the literature.<sup>2</sup> A 100 mL round bottom flask equipped with a stir bar was charged with dibenzo-1,4-dioxin-2,3,7,8-tetraamine hydrochloride (1.53 g, 6.25 mmol, 1.00 equiv.), glacial AcOH (15 mL), and H<sub>2</sub>O (2 mL). The flask was cooled to 0 °C using an ice water bath. Separately, NaNO<sub>2</sub> (0.65 g, 9.38 mmol, 1.50 equiv.) was dissolved in H<sub>2</sub>O (3 mL). The NaNO<sub>2</sub> solution was added dropwise to the substrate solution at 0 °C. The reaction mixture was allowed to warm to room temperature and stirred for 24 h at room temperature. H<sub>2</sub>O (100 mL) was

added, and the heterogeneous reaction mixture was filtered. The resulting brown solid was rinsed with H<sub>2</sub>O (100 mL) and MeOH (100 mL). Drying under vacuum for 12 h yielded bis(1*H*-1,2,3-triazolo[4,5-*b*],[4',5'-*i*])dibenzo[1,4]dioxin (H<sub>2</sub>btdd, 1.31 g, 79%) as a brown solid. <sup>1</sup>H NMR (500 MHz, DMSO-*d*<sub>6</sub>): δ 15.6 (bs, 2H), 7.63 (bs, 4H) ppm. This spectrum is consistent with that reported in the literature.<sup>2</sup>

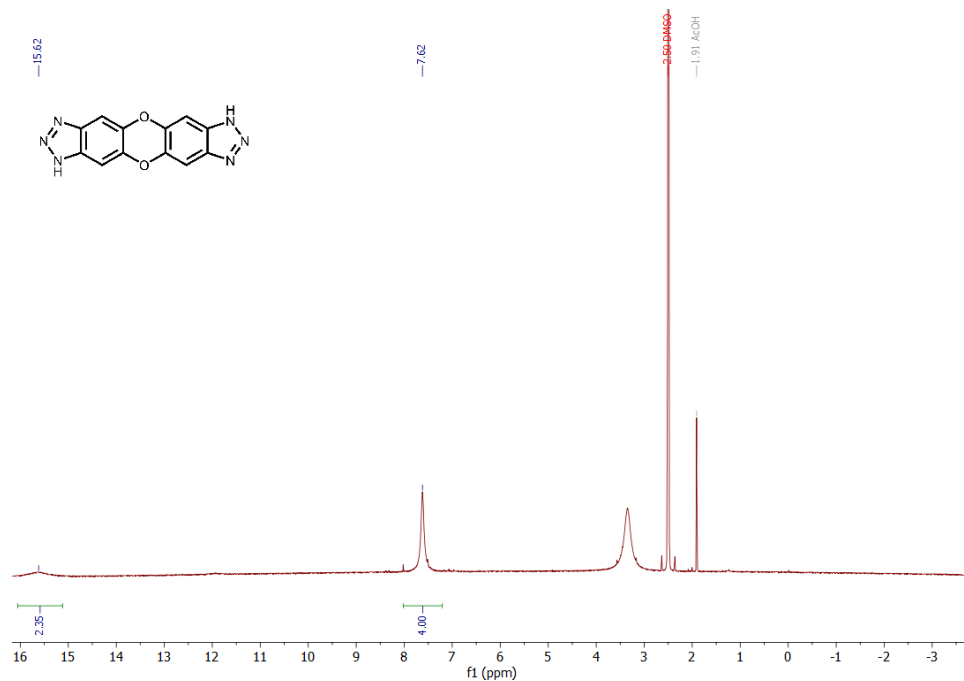

**Figure S2.** <sup>1</sup>H NMR spectrum (500 MHz, DMSO-*d*<sub>6</sub>) of H<sub>2</sub>btdd used in this work.

### 3. Synthesis, characterization, and gas sorption analysis of $\text{Mn}_2\text{Cl}_2(\text{btdd})$ .

**Synthesis of  $\text{Mn}_2\text{Cl}_2(\text{btdd})$ .** This procedure is adapted from the literature.<sup>4</sup> A 500 mL round-bottom flask was charged with  $\text{H}_2\text{btdd}$  (0.200 g, 0.75 mmol, 1.00 equiv.) and DMF (200 mL). The mixture was heated to 130 °C with stirring until the linker dissolved, and then the solution was allowed to cool to room temperature. Separately,  $\text{MnCl}_2 \cdot 4\text{H}_2\text{O}$  (0.296 g, 1.50 mmol, 2.00 equiv.) was dissolved in EtOH (200 mL) and concentrated HCl (4 mL) in a 500 mL Pyrex jar. Once cooled, the  $\text{H}_2\text{btdd}$  solution was added to the  $\text{MnCl}_2 \cdot 4\text{H}_2\text{O}$  solution and the jar was capped. The jar was placed in an oven that had been pre-heated to 60 °C and allowed to stand at 60 °C for 10 d. After this time, the jar was removed from the oven, and the heterogeneous reaction mixture was filtered. The collected solids were returned to the jar and suspended in fresh DMF (100 mL). The jar was returned to the oven and allowed to stand for 24 h at 60 °C, at which time the heterogeneous mixture was filtered, and the collected solids were returned to the jar and suspended in fresh DMF (100 mL). This procedure was repeated two additional times for a total of three hot DMF soaks. Next, the mixture was filtered and the collected solid was returned to the jar and suspended in fresh MeOH (100 mL). The solid was soaked in MeOH for 24 h at 60 °C in an oven three total times following the same procedure as described above. The heterogeneous mixture was filtered and the collected solid was transferred to a Schlenk flask. The material was activated under high vacuum (<100 mbar) at 100 °C for 24 h, and the Schlenk flask was transferred into a  $\text{N}_2$ -filled glovebox. Activated  $\text{Mn}_2\text{Cl}_2(\text{btdd})$  was obtained as an off-white solid. Prior to gas sorption analysis, the material was activated for an additional 24 h under high vacuum (<10  $\mu\text{bar}$ ) at 180 °C.

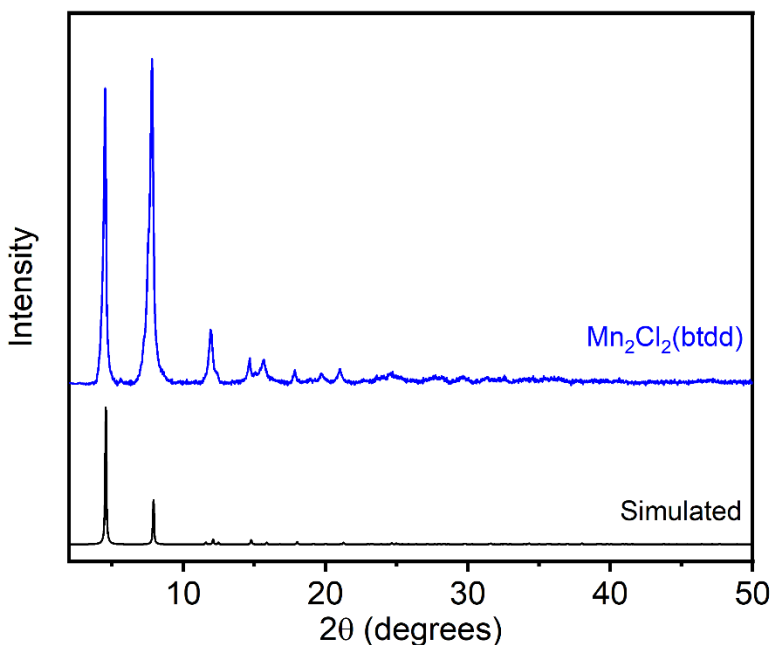

**Figure S3.** PXRD ( $\lambda = 1.54 \text{ \AA}$ ) pattern of MeOH-solvated  $\text{Mn}_2\text{Cl}_2(\text{btdd})$ . The simulated pattern (black) based on the SCXRD structure of  $\text{Mn}_2\text{Cl}_2(\text{btdd})$  is included for reference.<sup>4</sup>

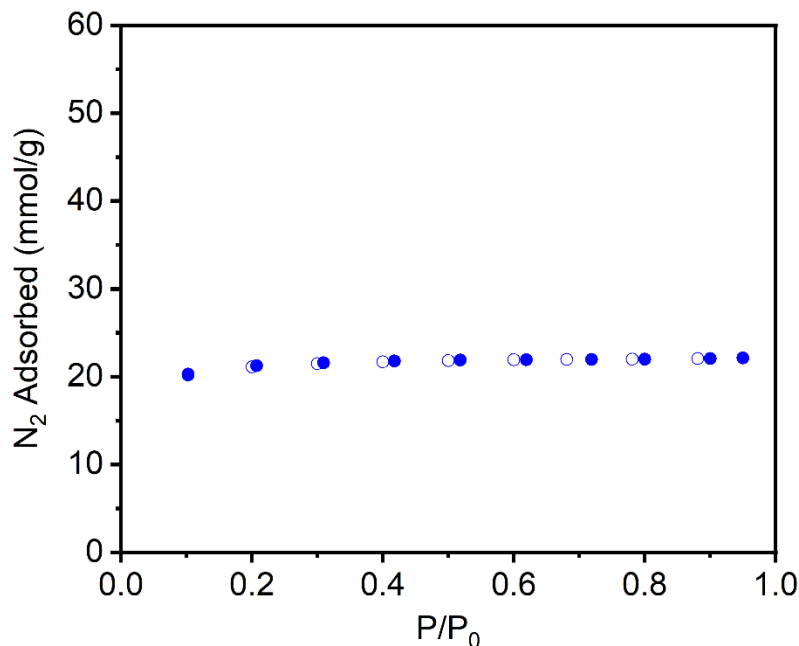

**Figure S4.**  $\text{N}_2$  adsorption (solid circles) and desorption (open circles) isotherms of activated  $\text{Mn}_2\text{Cl}_2(\text{btdd})$  at 77 K. The Langmuir surface area of this material was determined to be  $2169 \pm 3 \text{ m}^2/\text{g}$  (Literature BET:  $1917 \text{ m}^2/\text{g}$ ).<sup>4</sup> The unusually low surface area of this material compared to the other  $\text{M}_2\text{Cl}_2(\text{btdd})$  MOFs studied herein is likely due to its air sensitivity.

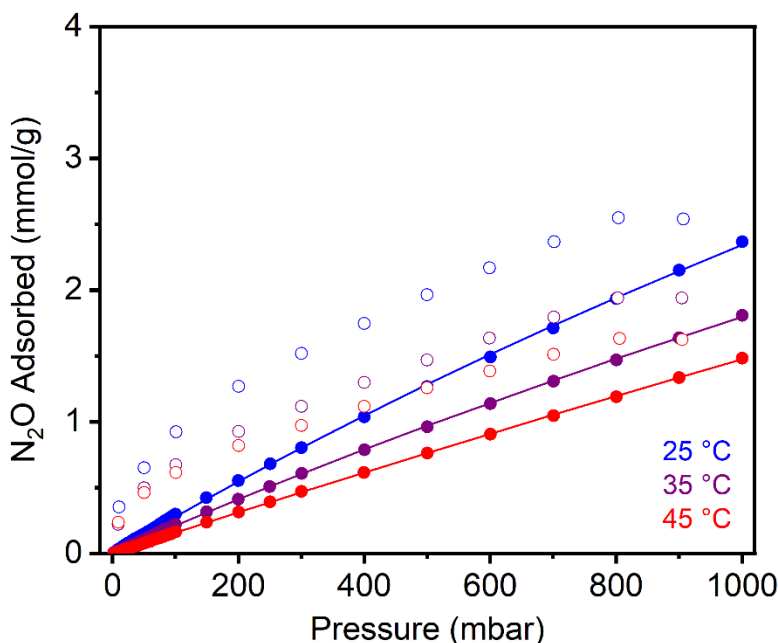

**Figure S5.**  $\text{N}_2\text{O}$  adsorption (solid circles) and desorption (open circles) isotherms of activated  $\text{Mn}_2\text{Cl}_2(\text{btdd})$  at 25 °C (blue), 35 °C (purple), and 45 °C (red). Solid lines represent fits to the dual-site Langmuir-Freundlich model. The sample was reactivated at 180 °C for 24 h under high vacuum ( $<10 \text{ } \mu\text{bar}$ ) between isotherms. A data point was considered equilibrated when less than 0.01% change in pressure occurred over a 30 or 60 s interval.

**Table S1.** Langmuir-Freundlich fit parameters determined from the fits in Figure S5.

|                                  | 25 °C | 35 °C | 45 °C |
|----------------------------------|-------|-------|-------|
| <b>Q<sub>sat1</sub> (mmol/g)</b> | 13.2  | 20.7  | 29.0  |
| <b>S1 (in multiples of R)</b>    | 4.94  | 7.69  | 7.77  |
| <b>E1 (kJ/mol)</b>               | 8.46  | 13.3  | 12.4  |
| <b>V1</b>                        | 1.00  | 1.00  | 1.00  |
| <b>Q<sub>sat2</sub> (mmol/g)</b> | 0.00  | 0.513 | 1.09  |
| <b>S2 (in multiples of R)</b>    | 0.029 | 0.041 | 1.38  |
| <b>E2 (kJ/mol)</b>               | 0.030 | 0.00  | 0.00  |
| <b>V2</b>                        | 1.00  | 1.00  | 1.00  |

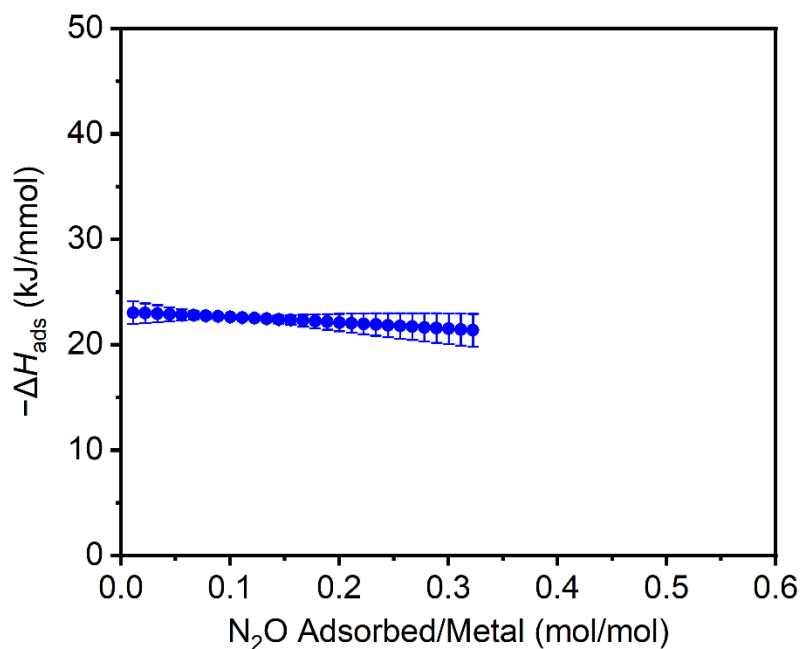

**Figure S6.**  $-\Delta H_{\text{ads}}$  for  $\text{N}_2\text{O}$  adsorption as a function of uptake per open metal site in  $\text{Mn}_2\text{Cl}_2(\text{btdd})$ , as determined using the fits in Figure S5.



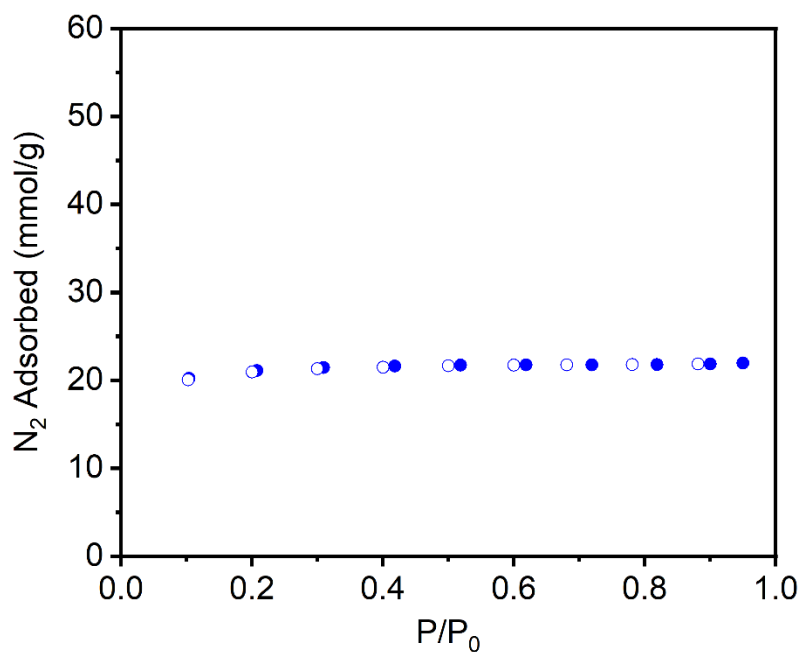

**Figure S7.**  $\text{N}_2$  adsorption (solid circles) and desorption (open circles) isotherms of activated  $\text{Mn}_2\text{Cl}_2(\text{btdd})$  at 77 K after the  $\text{N}_2\text{O}$  adsorption isotherms. The Langmuir surface area of this material was determined to be  $2149 \pm 4 \text{ m}^2/\text{g}$ .

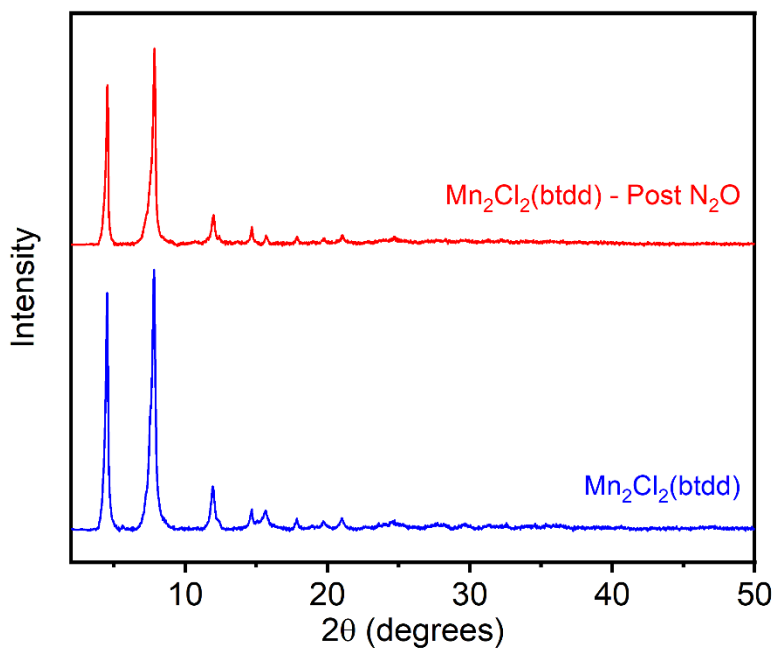

**Figure S8.** PXRD ( $\lambda = 1.54 \text{ \AA}$ ) pattern of activated  $\text{Mn}_2\text{Cl}_2(\text{btdd})$  after the  $\text{N}_2\text{O}$  adsorption isotherms. The experimental pattern prior to the  $\text{N}_2\text{O}$  adsorption isotherms is included for reference.

#### 4. Synthesis, characterization, and gas sorption analysis of $\text{Co}_2\text{Cl}_2(\text{btdd})$ .

**Synthesis of  $\text{Co}_2\text{Cl}_2(\text{btdd})$ .** This procedure is adapted from the literature.<sup>4</sup> A 1 L round-bottom flask was charged with  $\text{H}_2\text{btdd}$  (0.400 g, 1.50 mmol, 1.00 equiv.) and DMF (400 mL). The mixture was heated to 120 °C with stirring until the linker dissolved, and then the solution was allowed to cool to room temperature. Separately,  $\text{CoCl}_2 \cdot 6\text{H}_2\text{O}$  (0.714 g, 3.00 mmol, 2.00 equiv.) was dissolved in EtOH (400 mL) and concentrated HCl (8 mL) in a 1 L Pyrex jar. Once cooled, the  $\text{H}_2\text{btdd}$  solution was then added to the  $\text{CoCl}_2 \cdot 6\text{H}_2\text{O}$  solution and the jar was capped. The jar was placed in an oven that had been pre-heated to 60 °C and allowed to stand at 60 °C for 10 d. After this time, the jar was removed from the oven, and the heterogeneous reaction mixture was filtered. The collected solids were returned to the jar and suspended in fresh DMF (500 mL). The jar was returned to the oven and allowed to stand for 24 h at 60 °C, after which time the heterogeneous mixture was filtered and the collected solids were returned to the jar and suspended in fresh DMF (500 mL). This procedure was repeated two additional times for a total of three hot DMF soaks. Next, the mixture was filtered, and the collected solid was returned to the jar and suspended in fresh MeOH (500 mL). The solid was soaked in MeOH for 24 h at 60 °C in an oven three total times following the same procedure as described above. The heterogeneous mixture was filtered and the collected solid was transferred to a Schlenk flask. The material was activated under high vacuum (<100 mbar) at 100 °C for 24 h, then the Schlenk flask was transferred into a  $\text{N}_2$ -filled glovebox. Activated  $\text{Co}_2\text{Cl}_2(\text{btdd})$  was obtained as a dark green solid. Prior to gas sorption analysis, the material was activated for an additional 24 h under high vacuum (<10  $\mu\text{bar}$ ) at 180 °C.

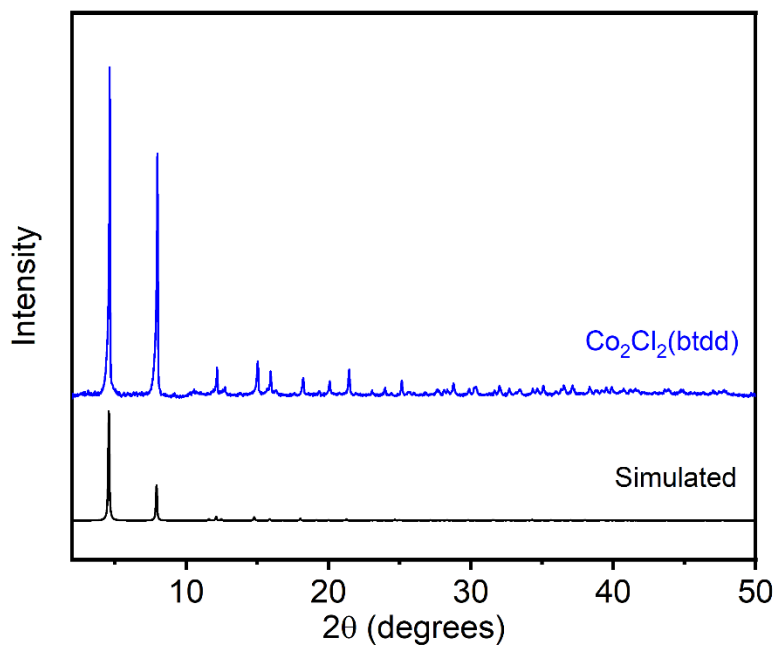

**Figure S9.** PXRD ( $\lambda = 1.54 \text{ \AA}$ ) pattern of MeOH-solvated  $\text{Co}_2\text{Cl}_2(\text{btdd})$ . The simulated pattern (black) based on the SCXRD structure of the isostructural MOF  $\text{Mn}_2\text{Cl}_2(\text{btdd})$  is included for reference.<sup>4</sup>

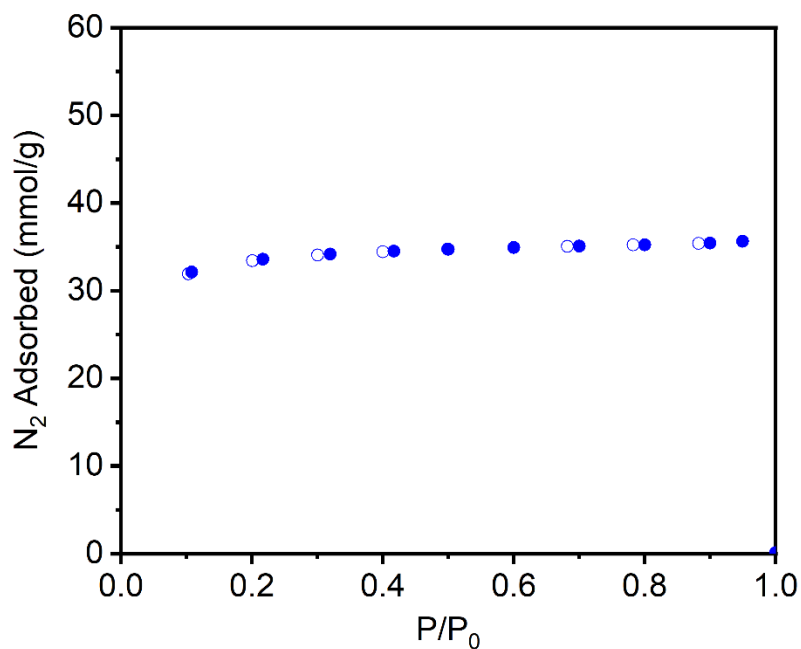

**Figure S10.**  $\text{N}_2$  adsorption (solid circles) and desorption (open circles) isotherms of activated  $\text{Co}_2\text{Cl}_2(\text{btdd})$  at 77 K. The Langmuir surface area of this material was determined to be  $3500 \pm 4 \text{ m}^2/\text{g}$  (Literature BET:  $1912 \text{ m}^2/\text{g}$ ).<sup>4</sup>

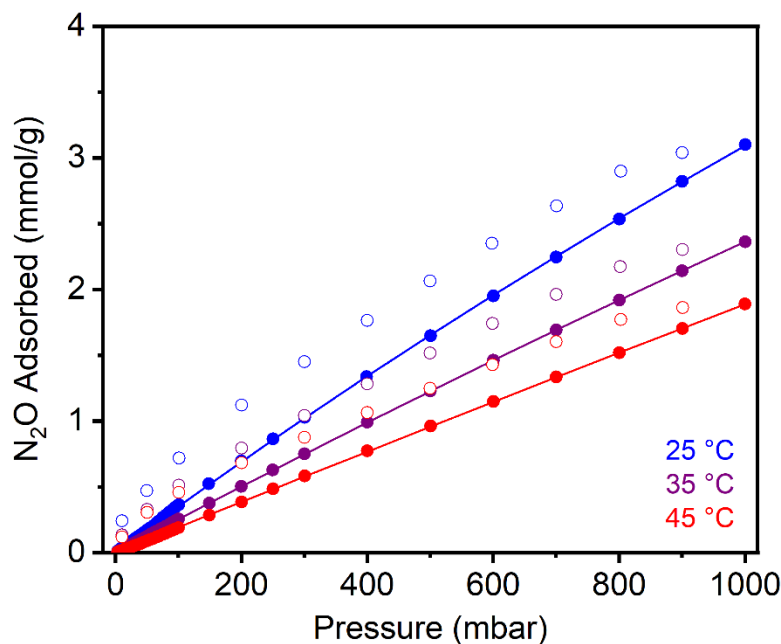

**Figure S11.** N<sub>2</sub>O adsorption (solid circles) and desorption (open circles) isotherms of activated Co<sub>2</sub>Cl<sub>2</sub>(btdd) at 25 °C (blue), 35 °C (purple), and 45 °C (red). Solid lines represent fits to the dual-site Langmuir-Freundlich model. The sample was reactivated at 180 °C for 24 h under high vacuum (<10 μbar) between isotherms. A data point was considered equilibrated when less than 0.01% change in pressure occurred over a 30 or 60 s interval.

**Table S2.** Langmuir-Freundlich fit parameters determined from the fits in Figure S11.

|                                  | 25 °C | 35 °C | 45 °C |
|----------------------------------|-------|-------|-------|
| <b>Q<sub>sat1</sub> (mmol/g)</b> | 23.7  | 31.5  | 73.1  |
| <b>S1 (in multiples of R)</b>    | 3.91  | 3.95  | 4.74  |
| <b>E1 (kJ/mol)</b>               | 4.99  | 3.69  | 2.94  |
| <b>V1</b>                        | 1.00  | 1.00  | 1.00  |
| <b>Q<sub>sat2</sub> (mmol/g)</b> | 0.00  | 0.00  | 0.00  |
| <b>S2 (in multiples of R)</b>    | 0.016 | 0.012 | 0.031 |
| <b>E2 (kJ/mol)</b>               | 0.030 | 0.00  | 0.00  |
| <b>V2</b>                        | 1.00  | 1.00  | 1.00  |

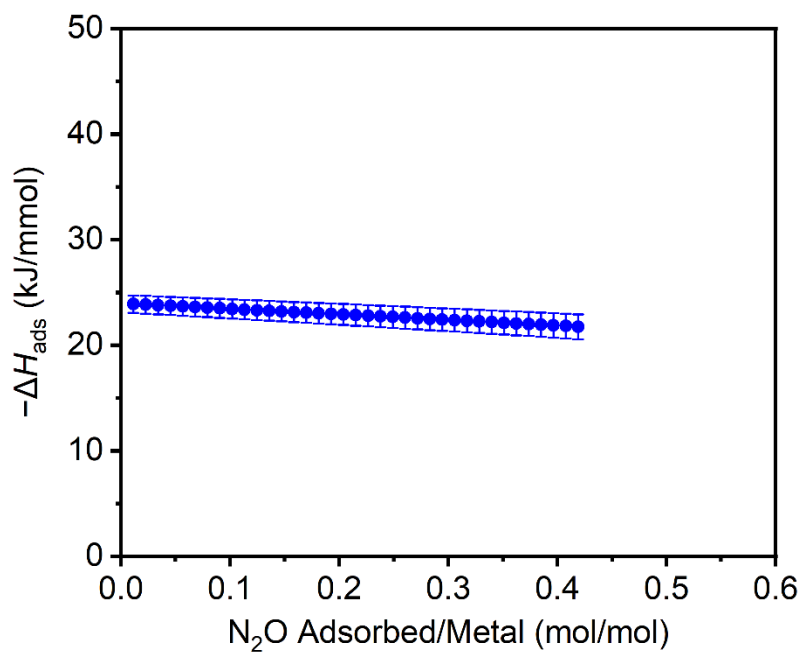

**Figure S12.**  $-\Delta H_{\text{ads}}$  for  $\text{N}_2\text{O}$  adsorption as a function of uptake per open metal site in  $\text{Co}_2\text{Cl}_2(\text{btdd})$ , as determined using the fits in Figure S11.

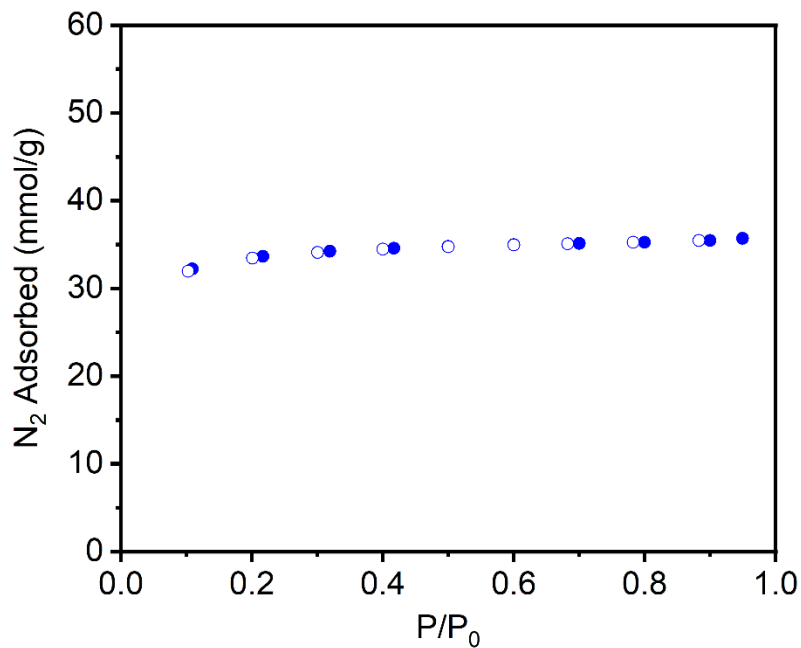

**Figure S13.**  $\text{N}_2$  adsorption (solid circles) and desorption (open circles) isotherms of activated  $\text{Co}_2\text{Cl}_2(\text{btdd})$  at 77 K after the  $\text{N}_2\text{O}$  adsorption isotherms. The Langmuir surface area of this material was determined to be  $3505 \pm 3 \text{ m}^2/\text{g}$ .

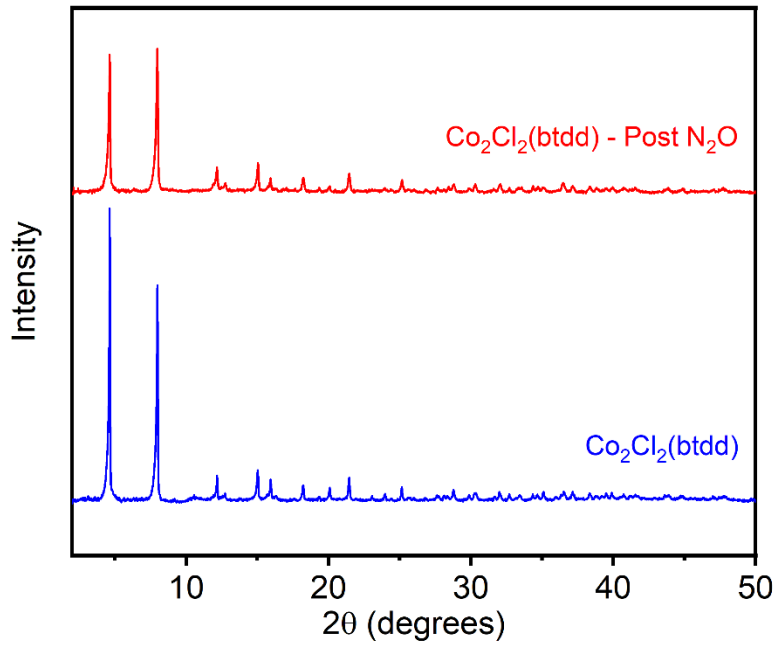

**Figure S14.** PXRD ( $\lambda = 1.54 \text{ \AA}$ ) pattern of activated  $\text{Co}_2\text{Cl}_2(\text{dobdc})$  after the  $\text{N}_2\text{O}$  adsorption isotherms. The experimental pattern prior to the  $\text{N}_2\text{O}$  adsorption isotherms is included for reference.

## 5. Synthesis, characterization, and gas sorption analysis of Ni<sub>2</sub>Cl<sub>2</sub>(btdd).

**Synthesis of Ni<sub>2</sub>Cl<sub>2</sub>(btdd).** This procedure is adapted from the literature.<sup>5</sup> Three 1 L Pyrex jars were each charged with H<sub>2</sub>btdd (0.30 g, 1.13 mmol, 1.00 equiv.) and DMF (300 mL). The jars were sealed and placed in an oven that had been pre-heated to 100 °C. Once the linker dissolved, the jars were removed from the oven and allowed to cool to room temperature. Separately, three separate solutions of NiCl<sub>2</sub>•6H<sub>2</sub>O (0.59 g, 2.48 mmol, 2.20 equiv.) dissolved in MeOH (300 mL) and concentrated HCl (192 mL) were prepared. The three NiCl<sub>2</sub>•6H<sub>2</sub>O solutions were added separately to the three Pyrex jars containing the H<sub>2</sub>btdd solutions. The jars were sealed and returned to the oven. The jars were allowed to stand at 100 °C for 2 d. At this time, the jars were removed from the oven, and the heterogeneous mixtures were filtered, combining the solids from all three jars into one sample. The collected solid was transferred to a 1 L Pyrex jar filled with fresh DMF (500 mL). The jar was allowed to stand for 24 h at room temperature, after which time the supernatant was decanted and replaced with fresh DMF (500 mL). This procedure was repeated two additional times for a total of three DMF soaks. Next, the mixture was filtered and the collected solid was returned to the jar and suspended in fresh MeOH (500 mL). The solid was soaked in MeOH for 24 h at room temperature in an oven three total times following the same procedure as described above. The heterogeneous mixture was filtered, and the collected solid was transferred to a Schlenk flask. The material was activated under flowing N<sub>2</sub> at 150 °C for 4 h, followed by further activation under high vacuum (<100 mbar) at 150 °C for 24 h. The Schlenk flask was transferred into a N<sub>2</sub>-filled glovebox. Activated Ni<sub>2</sub>Cl<sub>2</sub>(btdd) was obtained as a brown solid. Prior to gas sorption analysis, the material was activated for an additional 24 h under high vacuum (<10 μbar) at 180 °C.

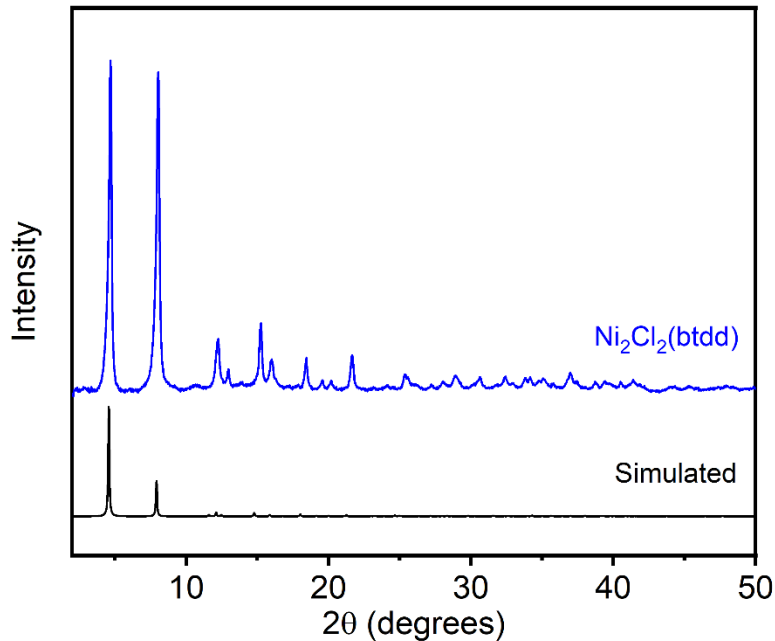

**Figure S15.** PXRD ( $\lambda = 1.54 \text{ \AA}$ ) pattern of MeOH-solvated  $\text{Ni}_2\text{Cl}_2(\text{btdd})$ . The simulated pattern (black) based on the SCXRD structure of the isostructural MOF  $\text{Mn}_2\text{Cl}_2(\text{btdd})$  is included for reference.<sup>4</sup>

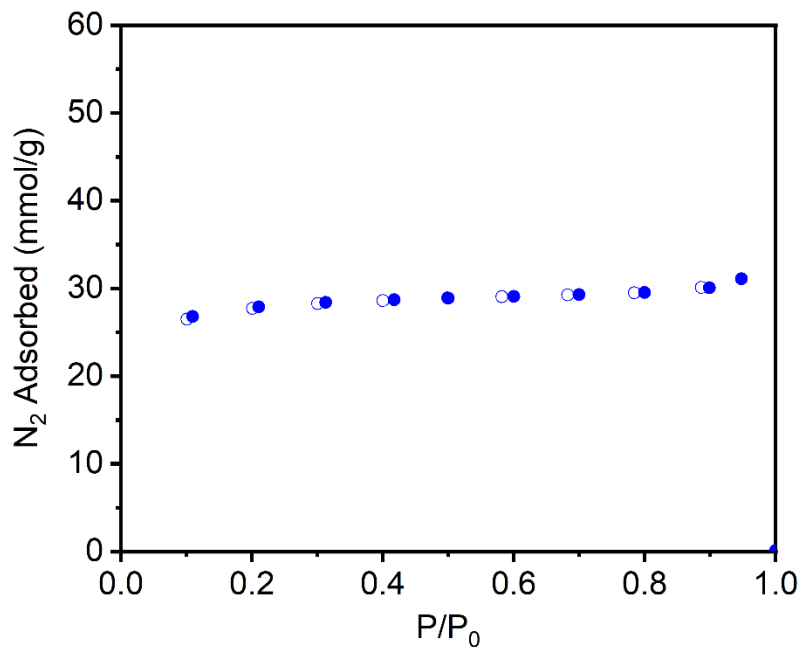

**Figure S16.**  $\text{N}_2$  adsorption (solid circles) and desorption (open circles) isotherms of activated  $\text{Ni}_2\text{Cl}_2(\text{btdd})$  at 77 K. The Langmuir surface area of this material was determined to be  $2930 \pm 9 \text{ m}^2/\text{g}$  (Literature BET:  $1837 \text{ m}^2/\text{g}$ ).<sup>5</sup>



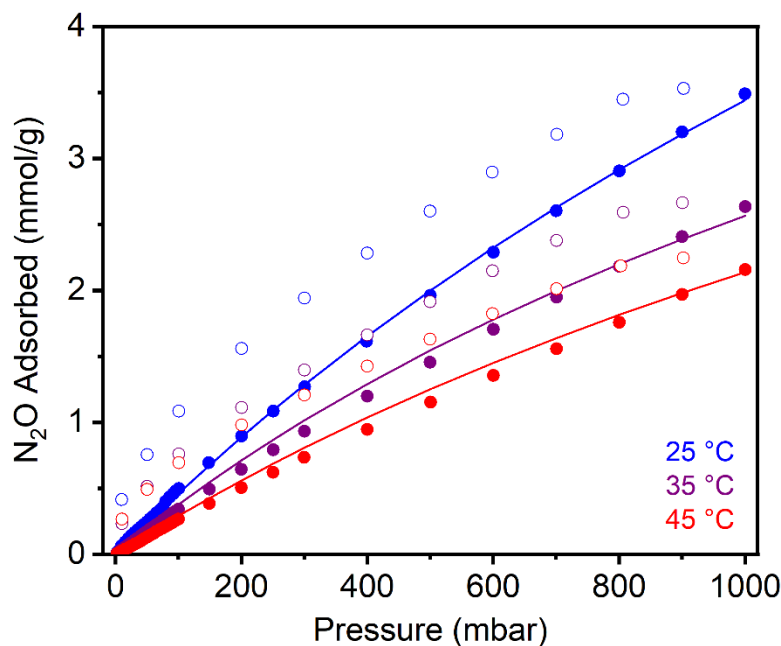

**Figure S17.** N<sub>2</sub>O adsorption (solid circles) and desorption (open circles) isotherms of activated Ni<sub>2</sub>Cl<sub>2</sub>(btd) at 25 °C (blue), 35 °C (purple), and 45 °C (red). Solid lines represent fits to the dual-site Langmuir-Freundlich model. The sample was reactivated at 180 °C for 24 h under high vacuum (<10 μbar) between isotherms. A data point was considered equilibrated when less than 0.01% change in pressure occurred over a 30 or 60 s interval.

**Table S3.** Langmuir-Freundlich fit parameters determined from the fits in Figure S17.

|                                  | 25 °C | 35 °C | 45 °C |
|----------------------------------|-------|-------|-------|
| <b>Q<sub>sat1</sub> (mmol/g)</b> | 6.81  | 6.95  | 7.29  |
| <b>S1 (in multiples of R)</b>    | 4.33  | 3.43  | 3.32  |
| <b>E1 (kJ/mol)</b>               | 4.73  | 5.79  | 5.91  |
| <b>V1</b>                        | 1.00  | 1.00  | 1.00  |
| <b>Q<sub>sat2</sub> (mmol/g)</b> | 9.24  | 1.86  | 0.586 |
| <b>S2 (in multiples of R)</b>    | 1.11  | 0.012 | 0.012 |
| <b>E2 (kJ/mol)</b>               | 0.805 | 0.00  | 0.00  |
| <b>V2</b>                        | 1.00  | 1.00  | 1.00  |

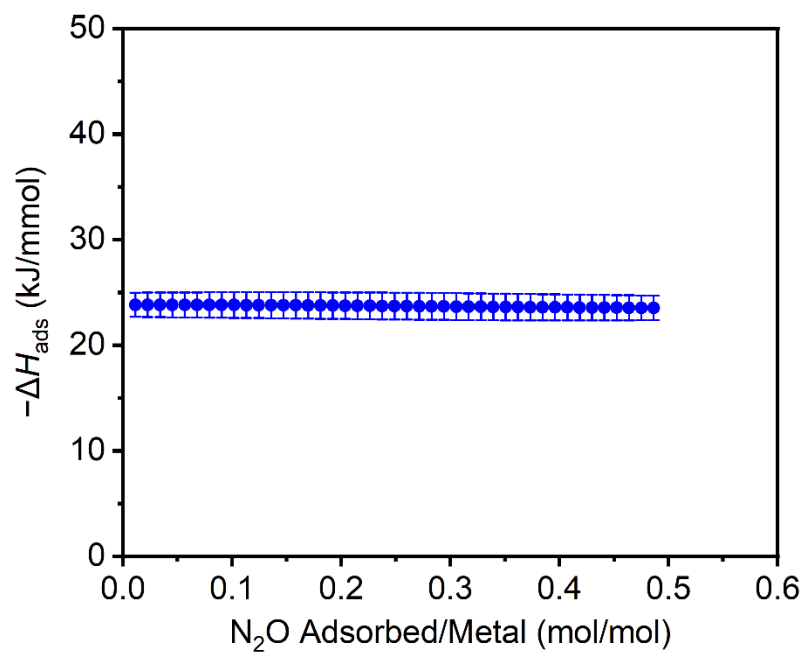

**Figure S18.**  $-\Delta H_{\text{ads}}$  for  $\text{N}_2\text{O}$  adsorption as a function of uptake per open metal site in  $\text{Ni}_2\text{Cl}_2(\text{btdd})$ , as determined using the fits in Figure S17.

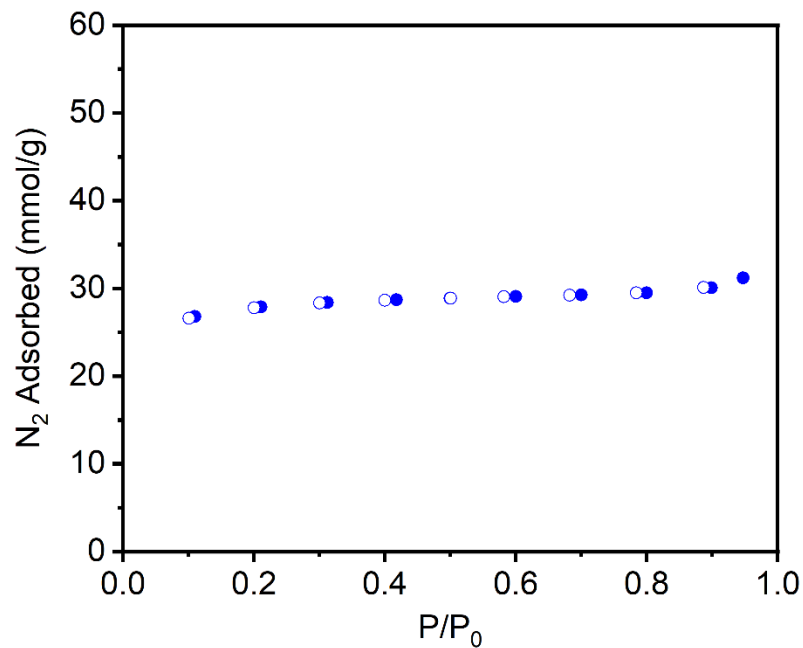

**Figure S19.**  $\text{N}_2$  adsorption (solid circles) and desorption (open circles) isotherms of activated  $\text{Ni}_2\text{Cl}_2(\text{btdd})$  at 77 K after the  $\text{N}_2\text{O}$  adsorption isotherms. The Langmuir surface area of this material was determined to be  $2924 \pm 7 \text{ m}^2/\text{g}$ .

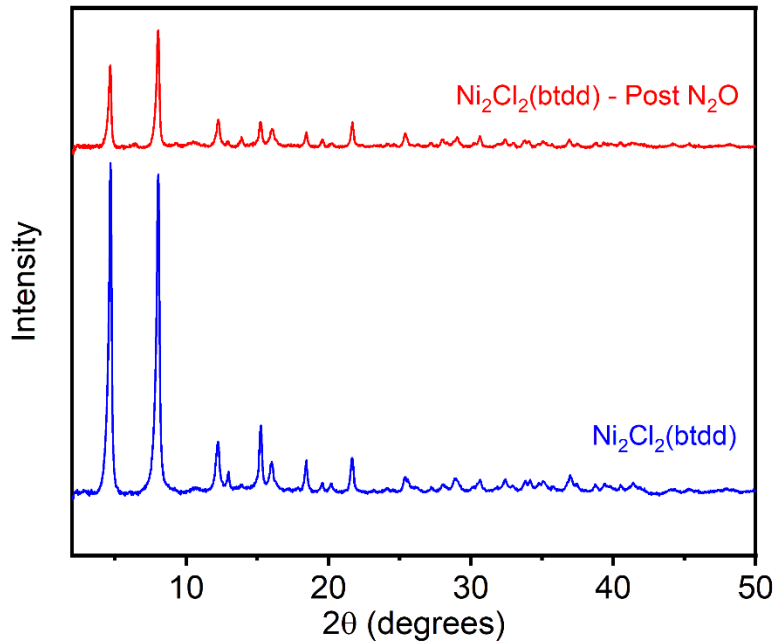

**Figure S20.** PXRD ( $\lambda = 1.54 \text{ \AA}$ ) pattern of activated  $\text{Ni}_2\text{Cl}_2(\text{btdd})$  after the  $\text{N}_2\text{O}$  adsorption isotherms. The experimental pattern prior to the  $\text{N}_2\text{O}$  adsorption isotherms is included for reference.

## 6. Synthesis, characterization, and gas sorption analysis of $\text{Cu}_2\text{Cl}_2(\text{btdd})$ .

**Synthesis of  $\text{Cu}_2\text{Cl}_2(\text{btdd})$ .** This procedure is adapted from the literature.<sup>6</sup> A 1 L round-bottom flask was charged with  $\text{H}_2\text{btdd}$  (0.360 g, 1.35 mmol, 1.00 equiv.) and DMF (400 mL). The mixture was heated to 120 °C with stirring until the linker dissolved, and then the solution was allowed to cool to room temperature. Separately,  $\text{CuCl}_2 \cdot 2\text{H}_2\text{O}$  (0.464 g, 2.72 mmol, 2.02 equiv.) was dissolved in *i*PrOH (400 mL) and concentrated HCl (6.4 mL) in a 1 L Pyrex jar. Once cooled, the  $\text{H}_2\text{btdd}$  solution was added to the  $\text{CuCl}_2 \cdot 6\text{H}_2\text{O}$  solution and the jar was capped. The jar was placed in an oven that had been pre-heated to 60 °C and allowed to stand at 60 °C for 10 d. After this time, the jar was removed from the oven, and the heterogeneous reaction mixture was filtered. The collected solid was returned to the jar and suspended in fresh DMF (500 mL). The jar was returned to the oven and allowed to stand for 24 h at 60 °C, after which time the heterogeneous mixture was filtered, and the collected solids were returned to the jar and suspended in fresh DMF (500 mL). This procedure was repeated two additional times for a total of three hot DMF soaks. Next, the mixture was filtered, and the collected solid was returned to the jar and suspended in fresh MeOH (500 mL). The solid was soaked in MeOH for 24 h at 60 °C in an oven three total times following the same procedure as described above. The heterogeneous mixture was filtered, and the collected solid was transferred to a Schlenk flask. The material was activated under high vacuum (<100 mbar) at 100 °C for 24 h, then the Schlenk flask was transferred into a  $\text{N}_2$ -filled glovebox. Activated  $\text{Cu}_2\text{Cl}_2(\text{btdd})$  was obtained as a dark red solid. Prior to gas sorption analysis, the material was activated for an additional 24 h under high vacuum (<10  $\mu\text{bar}$ ) at 180 °C.

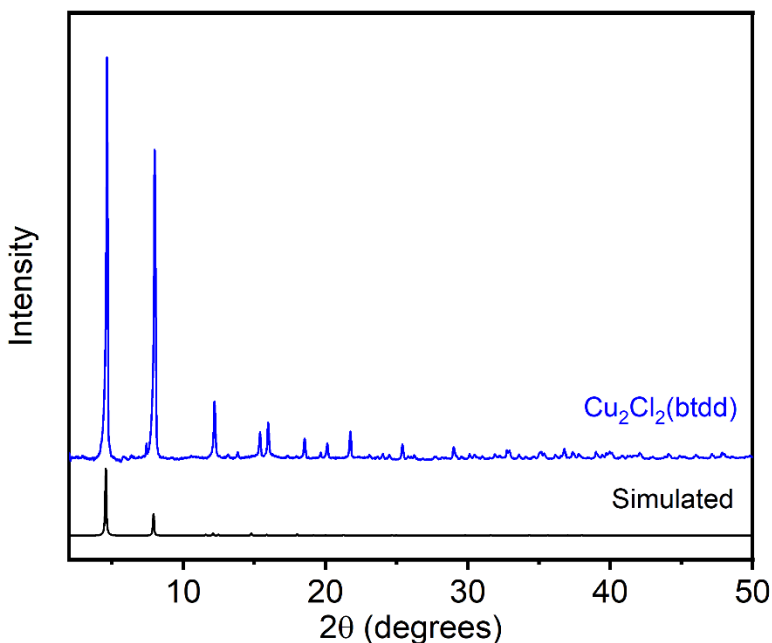

**Figure S21.** PXRD ( $\lambda = 1.54 \text{ \AA}$ ) pattern of MeOH-solvated  $\text{Cu}_2\text{Cl}_2(\text{btdd})$ . The simulated pattern (black) based on the SCXRD structure of the isostructural MOF  $\text{Mn}_2\text{Cl}_2(\text{btdd})$  is included for reference.<sup>4</sup>

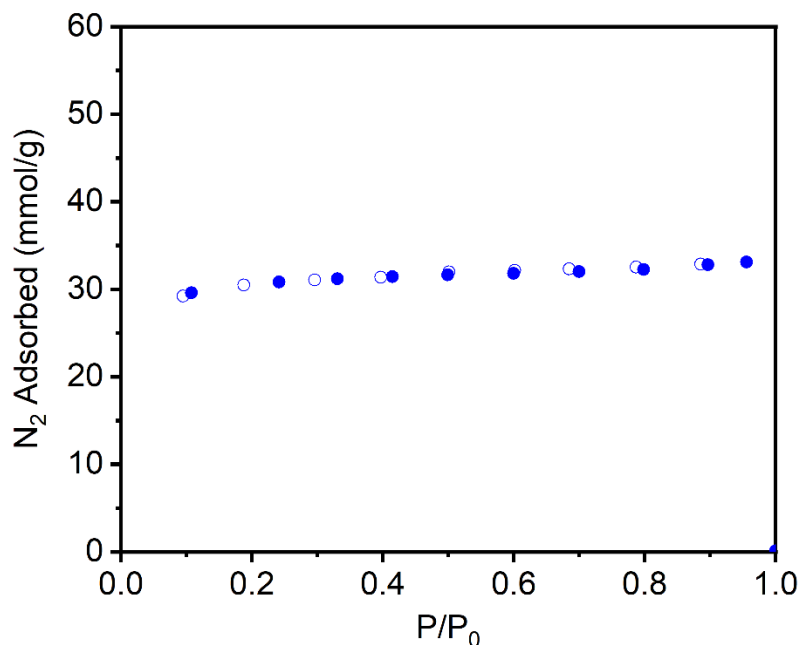

**Figure S22.** N<sub>2</sub> adsorption (solid circles) and desorption (open circles) isotherms of activated Cu<sub>2</sub>Cl<sub>2</sub>(btdd) at 77 K. The Langmuir surface area of this material was determined to be  $3196 \pm 7$  m<sup>2</sup>/g (Literature BET: 2066 m<sup>2</sup>/g).<sup>6</sup>

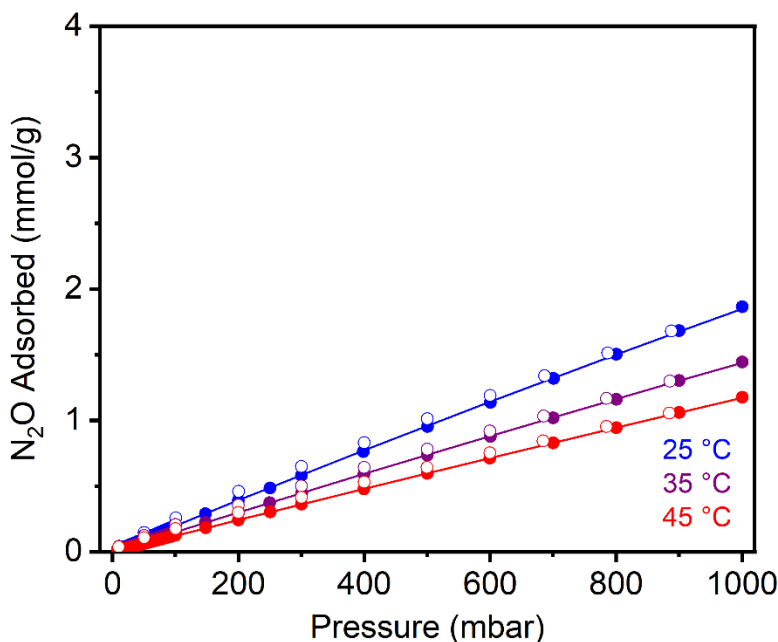

**Figure S23.** N<sub>2</sub>O adsorption (solid circles) and desorption (open circles) isotherms of activated Cu<sub>2</sub>Cl<sub>2</sub>(btdd) at 25 °C (blue), 35 °C (purple), and 45 °C (red). Solid lines represent fits to the dual-site Langmuir-Freundlich model. The sample was reactivated at 180 °C for 24 h under high vacuum (<10 μbar) between isotherms. A data point was considered equilibrated when less than 0.01% change in pressure occurred over a 30 or 60 s interval.

**Table S4.** Langmuir-Freundlich fit parameters determined from the fits in Figure S23.

|                                  | 25 °C | 35 °C | 45 °C |
|----------------------------------|-------|-------|-------|
| <b>Q<sub>sat1</sub> (mmol/g)</b> | 26.3  | 29.3  | 45.6  |
| <b>S1 (in multiples of R)</b>    | 5.04  | 3.85  | 5.09  |
| <b>E1 (kJ/mol)</b>               | 6.09  | 2.27  | 3.81  |
| <b>V1</b>                        | 1.00  | 1.00  | 1.00  |
| <b>Q<sub>sat2</sub> (mmol/g)</b> | 0.001 | 0.00  | 0.047 |
| <b>S2 (in multiples of R)</b>    | 0.016 | 0.040 | 0.012 |
| <b>E2 (kJ/mol)</b>               | 0.030 | 0.00  | 0.00  |
| <b>V2</b>                        | 1.00  | 1.00  | 1.00  |

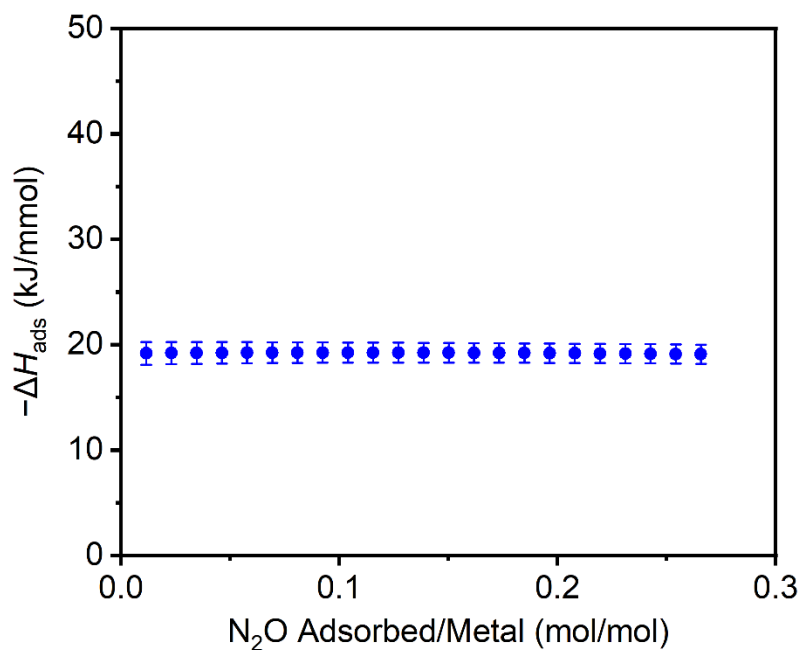

**Figure S24.**  $-\Delta H_{\text{ads}}$  for  $\text{N}_2\text{O}$  adsorption as a function of uptake per open metal site in  $\text{Cu}_2\text{Cl}_2(\text{btdd})$ , as determined using the fits in Figure S23.

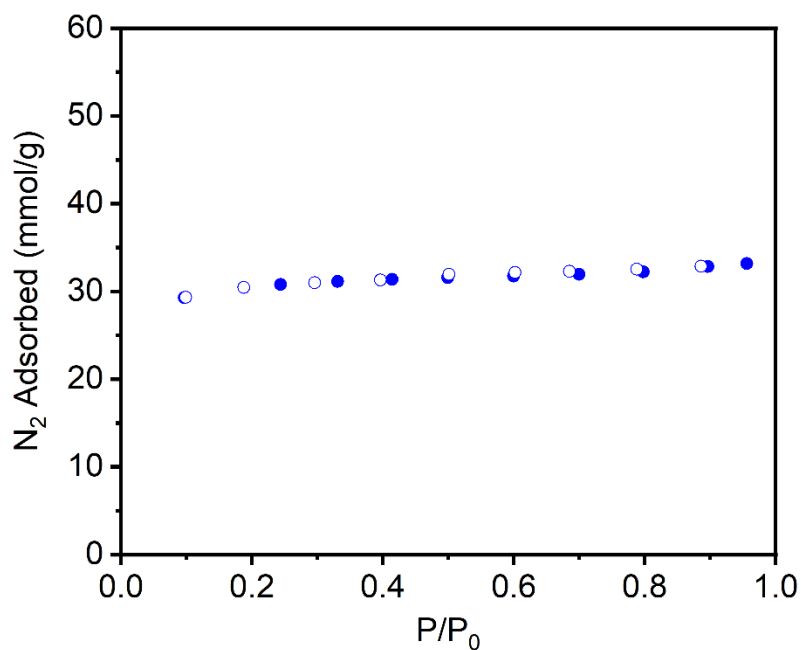

**Figure S25.** N<sub>2</sub> adsorption (solid circles) and desorption (open circles) isotherms of activated Cu<sub>2</sub>Cl<sub>2</sub>(btdd) at 77 K after the N<sub>2</sub>O adsorption isotherms. The Langmuir surface area of this material was determined to be  $3191 \pm 8$  m<sup>2</sup>/g.

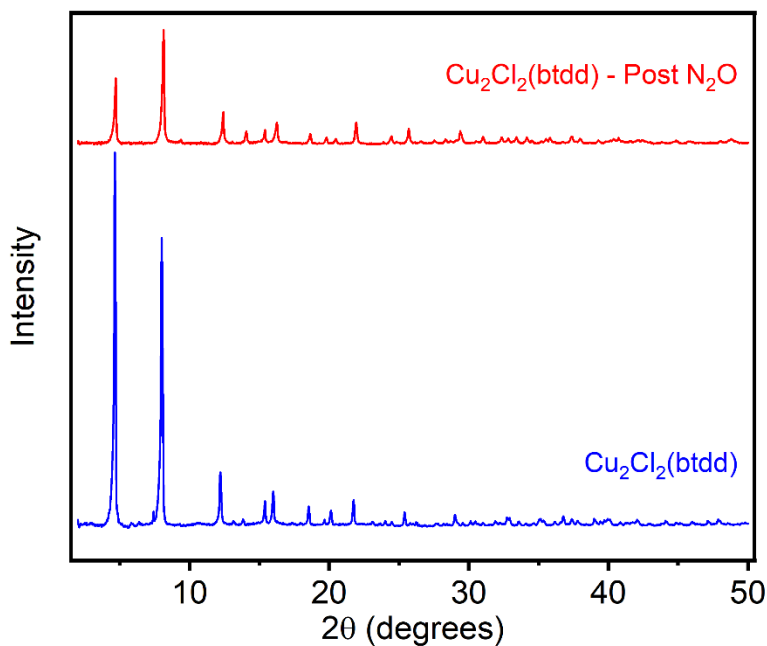

**Figure S26.** PXRD ( $\lambda = 1.54$  Å) pattern of activated Cu<sub>2</sub>Cl<sub>2</sub>(btdd) after the N<sub>2</sub>O adsorption isotherms. The experimental pattern prior to the N<sub>2</sub>O adsorption isotherms is included for reference.

## 7. Synthesis, characterization, and gas sorption analysis of Mg<sub>2</sub>(dobdc).

**Synthesis of Mg<sub>2</sub>(dobdc).** This procedure is adapted from the literature.<sup>7</sup> A 1 L round bottom flask equipped with a stir bar and reflux condenser was charged with H<sub>4</sub>dobdc (0.991 g, 5.00 mmol, 1.00 equiv.), Mg(NO<sub>3</sub>)<sub>2</sub>•6H<sub>2</sub>O (3.21 g, 12.5 mmol, 2.50 equiv.), H<sub>2</sub>O (25 mL), EtOH (25 mL), and DMF (450 mL). The reaction mixture was transferred to a silicone oil bath and stirred at reflux (700 rpm) for 24 h. After 24 h, the heterogeneous reaction mixture was allowed to cool to room temperature and filtered. The resulting solid was transferred to a 500 mL Pyrex jar with fresh DMF (250 mL). The jar was allowed to stand for 24 h at 120 °C in an oven, at which time the DMF was decanted and replaced with fresh DMF (250 mL). This procedure was repeated two additional times for a total of three hot DMF soaks. Next, the solid was filtered and returned to the jar with fresh MeOH (250 mL). The solid was soaked in MeOH for 24 h at 60 °C in an oven three total times following the same procedure as described above. Complete exchange of DMF for MeOH was confirmed by IR spectroscopy. The resulting light brown solid was filtered and transferred to a Schlenk flask. The solid was activated under flowing N<sub>2</sub> at 180 °C for 4 h, followed by further activation under high vacuum (<100 mbar) at 180 °C for 24 h. The Schlenk flask was transferred into a N<sub>2</sub>-filled glovebox. Activated Mg<sub>2</sub>(dobdc) was obtained as a light brown solid. Prior to gas sorption analysis the sample was further activated under high vacuum (<10 μbar) at 180 °C for 24 h.

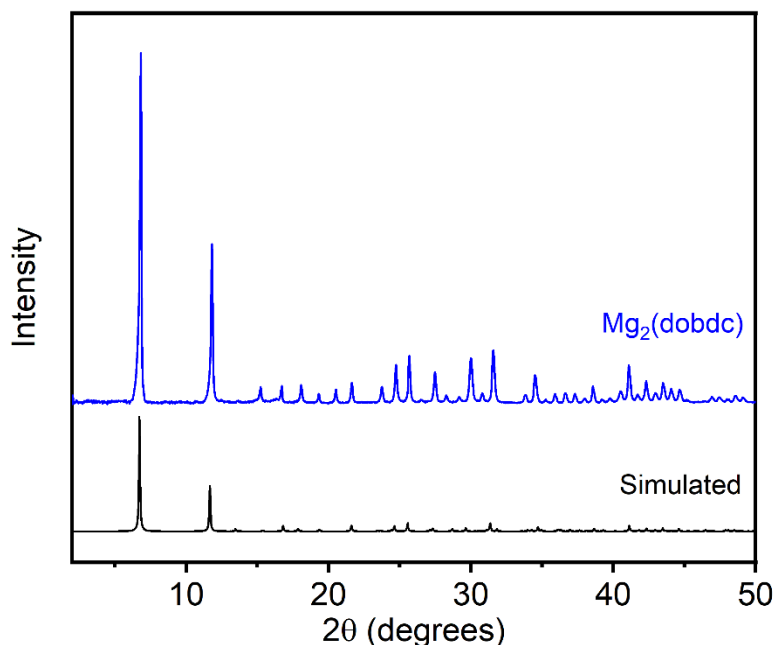

**Figure S27.** PXRD ( $\lambda = 1.54 \text{ \AA}$ ) pattern of MeOH-solvated Mg<sub>2</sub>(dobdc). The simulated pattern (black) based on the SCXRD structure of the isostructural MOF Zn<sub>2</sub>(dobdc) is included for reference.<sup>1</sup>



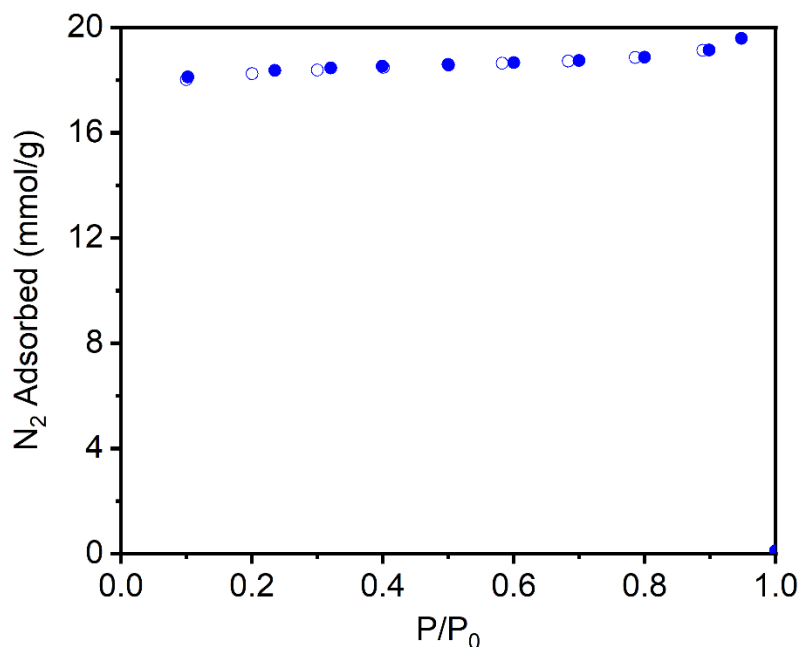

**Figure S28.** N<sub>2</sub> adsorption (solid circles) and desorption (open circles) isotherms of activated Mg<sub>2</sub>(dobdc) at 77 K. The Langmuir surface area of this material was determined to be 1852 ± 5 m<sup>2</sup>/g (Literature: 1957 m<sup>2</sup>/g).<sup>8</sup>

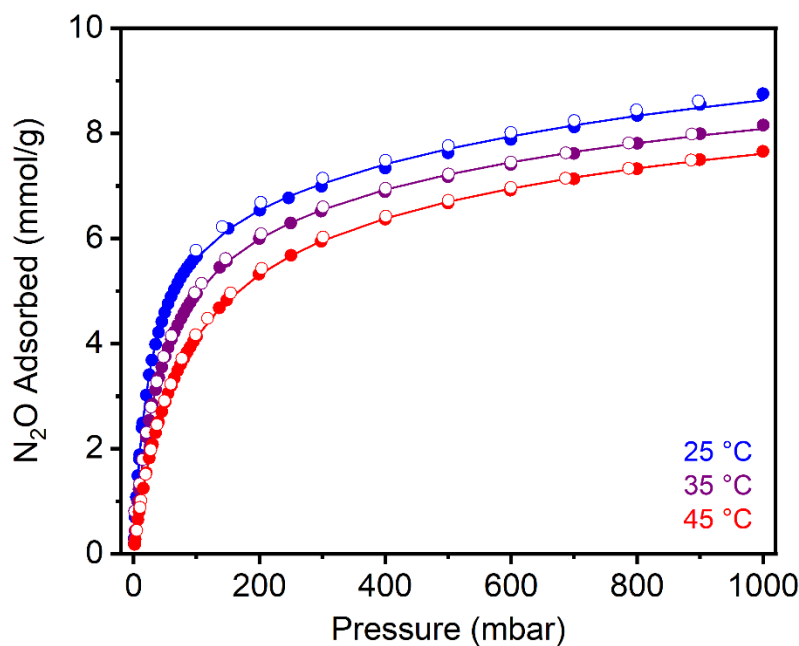

**Figure S29.** N<sub>2</sub>O adsorption (solid circles) and desorption (open circles) isotherms of activated Mg<sub>2</sub>(dobdc) at 25 °C (blue), 35 °C (purple), and 45 °C (red). Solid lines represent fits to the dual-site Langmuir-Freundlich model. The sample was reactivated at 180 °C for 24 h under high vacuum (<10 μbar) between isotherms. A data point was considered equilibrated when less than 0.01% change in pressure occurred over a 30 or 60 s interval.

**Table S5.** Langmuir-Freundlich fit parameters determined from the fits in Figure S29.

|                                  | 25 °C | 35 °C | 45 °C |
|----------------------------------|-------|-------|-------|
| <b>Q<sub>sat1</sub> (mmol/g)</b> | 6.47  | 6.43  | 6.30  |
| <b>S1 (in multiples of R)</b>    | 4.36  | 4.46  | 4.50  |
| <b>E1 (kJ/mol)</b>               | 20.0  | 19.7  | 19.1  |
| <b>V1</b>                        | 1.00  | 1.00  | 1.00  |
| <b>Q<sub>sat2</sub> (mmol/g)</b> | 4.75  | 3.83  | 3.41  |
| <b>S2 (in multiples of R)</b>    | 0.056 | 0.012 | 0.011 |
| <b>E2 (kJ/mol)</b>               | 0.00  | 0.00  | 0.00  |
| <b>V2</b>                        | 1.00  | 1.00  | 1.00  |

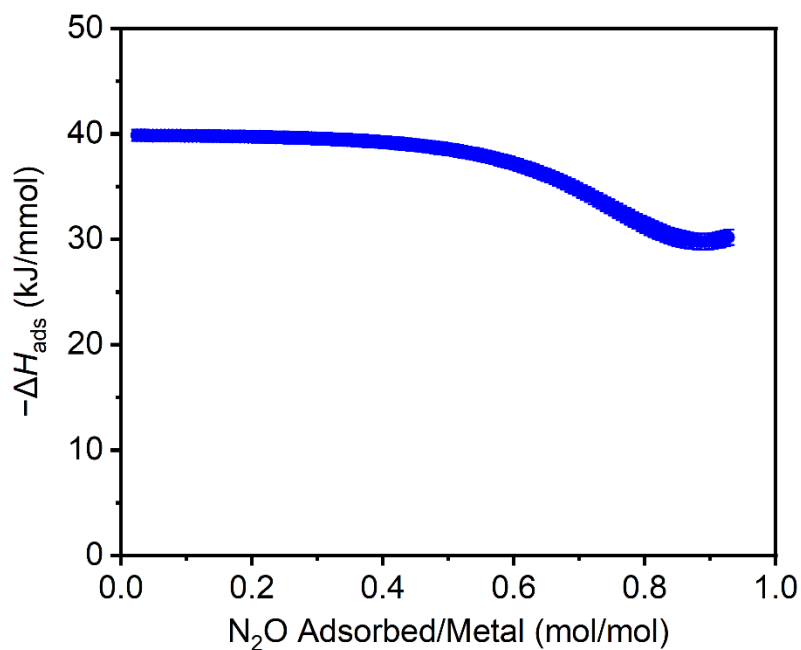

**Figure S30.** Heat of adsorption ( $-\Delta H_{\text{ads}}$ ) for  $\text{N}_2\text{O}$  adsorption as a function of uptake per open metal site in  $\text{Mg}_2(\text{dobdc})$ , as determined using the fits in Figure S29.

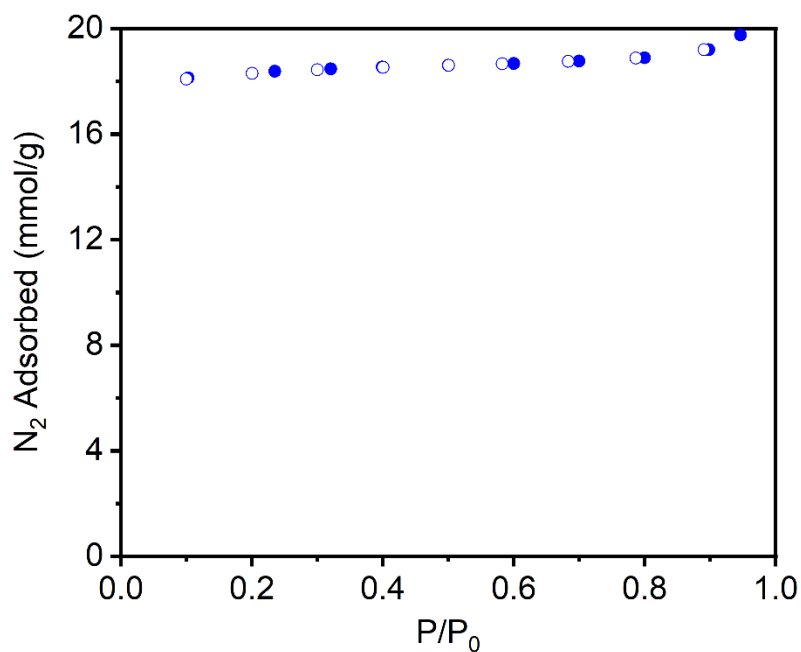

**Figure S31.** N<sub>2</sub> adsorption (solid circles) and desorption (open circles) isotherms of activated Mg<sub>2</sub>(dobdc) at 77 K after the N<sub>2</sub>O adsorption isotherms. The Langmuir surface area of this material was determined to be 1854 ± 5 m<sup>2</sup>/g.

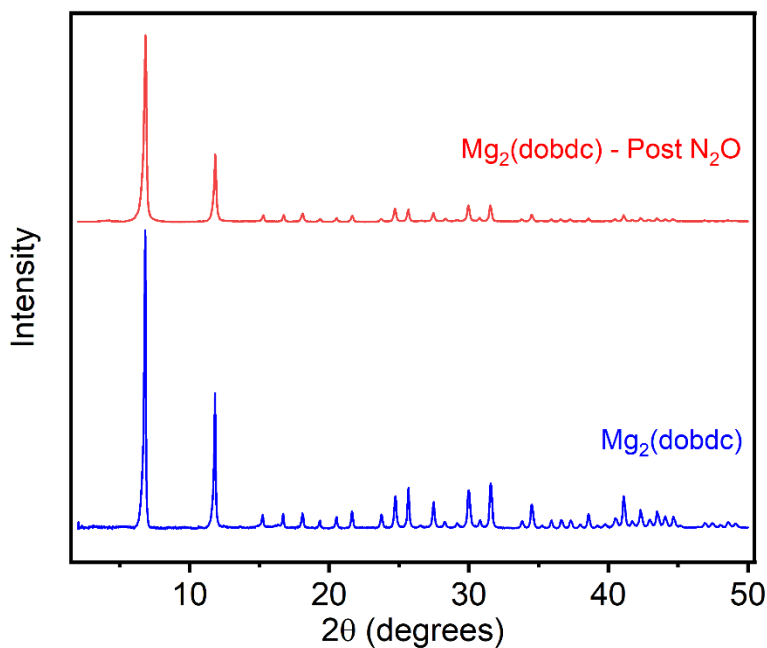

**Figure S32.** PXRD ( $\lambda = 1.54 \text{ \AA}$ ) pattern of activated Mg<sub>2</sub>(dobdc) after the N<sub>2</sub>O adsorption isotherms. The experimental pattern prior to the N<sub>2</sub>O adsorption isotherms is included for reference.

## 8. Synthesis, characterization, and gas sorption analysis of Mn<sub>2</sub>(dobdc).

**Synthesis of Mn<sub>2</sub>(dobdc).** An air-free synthesis was developed based on previously reported procedures.<sup>9,10</sup> All steps of this reaction were performed under an N<sub>2</sub> atmosphere due to the air-sensitivity of Mn<sub>2</sub>(dobdc). In a N<sub>2</sub>-filled glovebox, a 350 mL screw-capped pressure vessel was charged with MnCl<sub>2</sub>·4H<sub>2</sub>O (5.35 g, 27.0 mmol, 4.15 eq.), H<sub>4</sub>dobdc (1.35 g, 6.5 mmol, 1.00 eq.), dry degassed EtOH (10 mL), and dry degassed DMF (150 mL). The vessel was tightly sealed, removed from the glovebox, and placed in an oil bath. The reaction mixture was gently stirred at 135 °C for 72 h, resulting in precipitation of bright orange solid from solution. The reaction mixture was allowed to cool to room temperature, returned to the glovebox, and filtered under an atmosphere of N<sub>2</sub>. The collected solid was returned to the 350 mL pressure vessel with fresh dry degassed DMF (150 mL). The tightly sealed vessel was placed in an oil bath and heated to 100 °C without stirring for 24 h, at which time the vessel was removed from the oil bath and returned to the glovebox. The non-homogeneous mixture was filtered and the collected solid was returned to the pressure vessel with fresh DMF (150 mL). This soaking process was repeated two more times for a total of three DMF soaks at 100 °C. After the final soak, the mixture was filtered, returned to the 350 mL pressure vessel, and the solid was suspended in MeOH (50 mL). The solid was soaked in MeOH for 24 h at 60 °C in an oil bath eight total times following the same procedure as described above. Complete exchange of DMF for MeOH was confirmed by IR spectroscopy. The mixture was filtered again, and the collected solid was transferred to a 20 mL scintillation vial equipped with a vacuum adapter. The material was activated under high vacuum (<100 mTorr) at 180 °C for 24 h in a N<sub>2</sub>-filled glovebox. Activated Mn<sub>2</sub>(dobdc) (0.530 g, 25.5%) was obtained as a bright orange solid. Prior to gas sorption analysis, the material was activated for an additional 24 h under high vacuum (<10 μbar) at 180 °C.

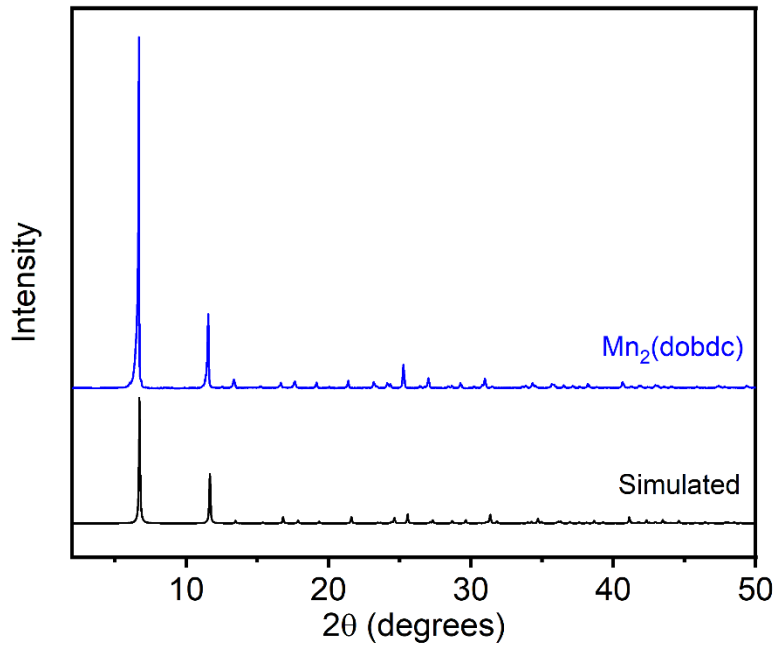

**Figure S33.** PXRD ( $\lambda = 1.54 \text{ \AA}$ ) pattern of activated  $\text{Mn}_2(\text{dobdc})$ . The simulated pattern (black) based on the SCXRD structure of the isostructural MOF  $\text{Zn}_2(\text{dobdc})$  is included for reference.<sup>1</sup>

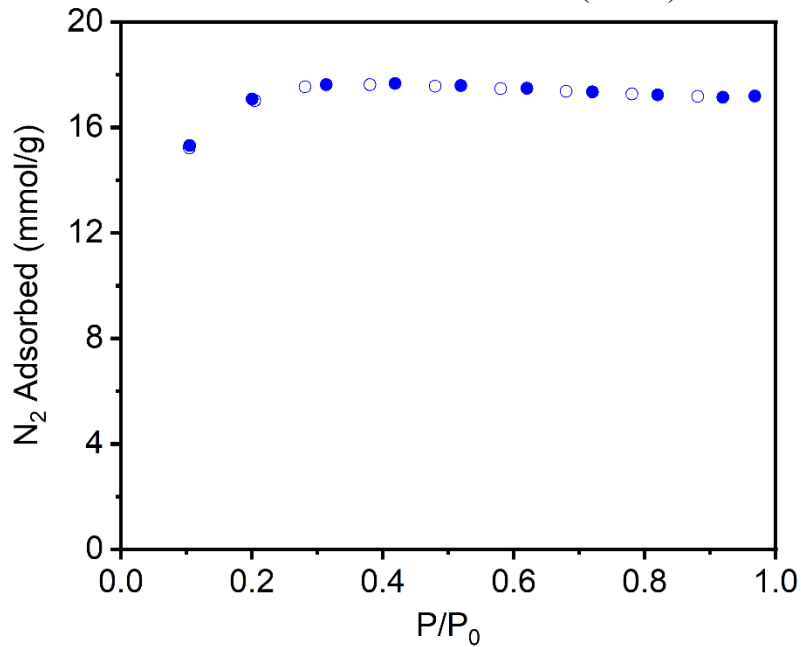

**Figure S34.**  $\text{N}_2$  adsorption (solid circles) and desorption (open circles) isotherms of activated  $\text{Mn}_2(\text{dobdc})$  at 77 K. The Langmuir surface area of this material was determined to be  $1672 \pm 13 \text{ m}^2/\text{g}$  (Literature:  $1797 \text{ m}^2/\text{g}$ ).<sup>8</sup>

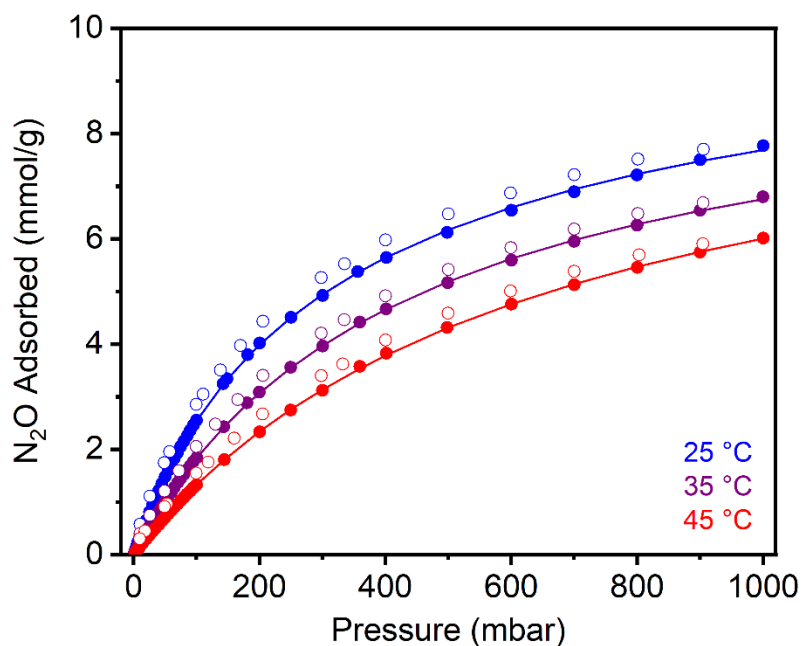

**Figure S35.** N<sub>2</sub>O adsorption (solid circles) and desorption (open circles) isotherms of activated Mn<sub>2</sub>(dobdc) at 25 °C (blue), 35 °C (purple), and 45 °C (red). Solid lines represent fits to the dual-site Langmuir-Freundlich model. The sample was reactivated at 180 °C for 24 h under high vacuum (<10 μbar) between isotherms. A data point was considered equilibrated when less than 0.01% change in pressure occurred over a 30 or 60 s interval.

**Table S6.** Langmuir-Freundlich fit parameters determined from the fits in Figure S35.

|                                  | 25 °C | 35 °C | 45 °C |
|----------------------------------|-------|-------|-------|
| <b>Q<sub>sat1</sub> (mmol/g)</b> | 6.07  | 1.33  | 8.34  |
| <b>S1 (in multiples of R)</b>    | 4.66  | 5.68  | 4.76  |
| <b>E1 (kJ/mol)</b>               | 15.5  | 17.9  | 7.03  |
| <b>V1</b>                        | 1.00  | 1.00  | 1.00  |
| <b>Q<sub>sat2</sub> (mmol/g)</b> | 4.55  | 8.38  | 3.21  |
| <b>S2 (in multiples of R)</b>    | 0.014 | 0.012 | 0.864 |
| <b>E2 (kJ/mol)</b>               | 0.873 | 1.97  | 1.05  |
| <b>V2</b>                        | 1.00  | 1.00  | 1.00  |

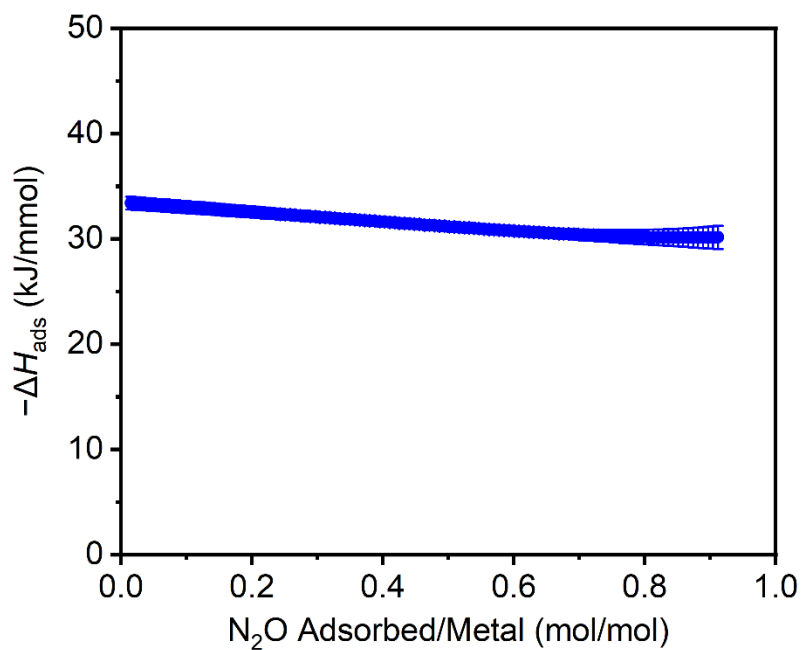

**Figure S36.**  $-\Delta H_{\text{ads}}$  for N<sub>2</sub>O adsorption as a function of uptake per open metal site in Mn<sub>2</sub>(dobdc), as determined using the fits in Figure S35.

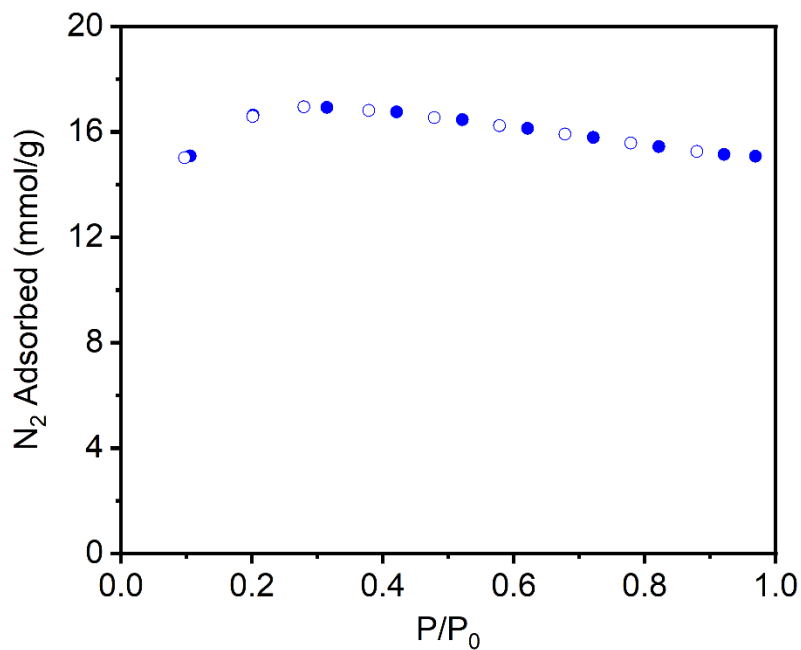

**Figure S37.** N<sub>2</sub> adsorption (solid circles) and desorption (open circles) isotherms of activated Mn<sub>2</sub>(dobdc) at 77 K after the N<sub>2</sub>O adsorption isotherms. The Langmuir surface area of this material was determined to be  $1463 \pm 25 \text{ m}^2/\text{g}$ .

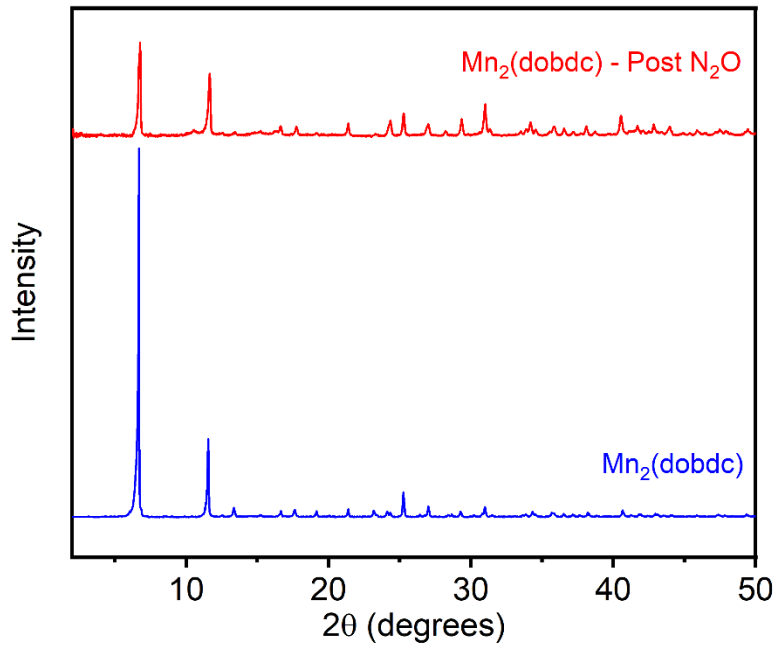

**Figure S38.** PXRD ( $\lambda = 1.54 \text{ \AA}$ ) pattern of activated  $\text{Mn}_2(\text{dobdc})$  after the  $\text{N}_2\text{O}$  adsorption isotherms. The experimental pattern prior to the  $\text{N}_2\text{O}$  adsorption isotherms is included for reference.



## 9. Synthesis, characterization, and gas sorption analysis of Fe<sub>2</sub>(dobdc).

**Synthesis of Fe<sub>2</sub>(dobdc).** Prepared according to a modified literature procedure.<sup>11</sup> All steps of this reaction were performed under an N<sub>2</sub> atmosphere due to the air-sensitivity of Fe<sub>2</sub>(dobdc). In a N<sub>2</sub>-filled glovebox, a 350 mL screw-cap high pressure reaction vessel equipped with a stir bar was charged with FeCl<sub>2</sub> (0.550 g, 4.50 mmol, 2.50 eq.), H<sub>4</sub>dobdc (0.355 g, 1.80 mmol, 1.00 eq.), dry degassed DMF (150 mL), and dry degassed MeOH (18 mL). The reaction vessel was sealed, and the reaction mixture was allowed to stir slowly at 120 °C for 18 h, resulting in precipitation of an orange-red powder from solution. The reaction mixture was allowed to cool to room temperature, returned to the glovebox, and the supernatant was decanted under an atmosphere of N<sub>2</sub>. Next, fresh dry degassed DMF (150 mL) was added. The tightly sealed vessel was removed from the glovebox, placed in an oil bath, and heated to 120 °C without stirring for 24 h, after which time the vessel was removed from the oil bath and returned to the glovebox. The supernatant was decanted under an atmosphere of N<sub>2</sub>, then fresh dry degassed DMF (150 mL) was added to the reaction vessel. This soaking process was repeated three more times for a total of four hot DMF soaks. After the final soak, the supernatant was decanted under an atmosphere of N<sub>2</sub>, then fresh dry degassed MeOH (150 mL) was added to the reaction vessel. The solid was soaked in MeOH for 24 h at 60 °C in an oil bath three total times following the same procedure as described above. The mixture was filtered in a N<sub>2</sub>-filled glovebox, and the collected solid was transferred to a Schlenk flask. The material was activated under high vacuum (<100 mTorr) at 180 °C for 24 h, then the Schlenk flask was returned to the glovebox. Activated Fe<sub>2</sub>(dobdc) was obtained as a light green solid. Prior to gas sorption analysis, the material was activated for an additional 24 h under high vacuum (<10 μbar) at 180 °C.

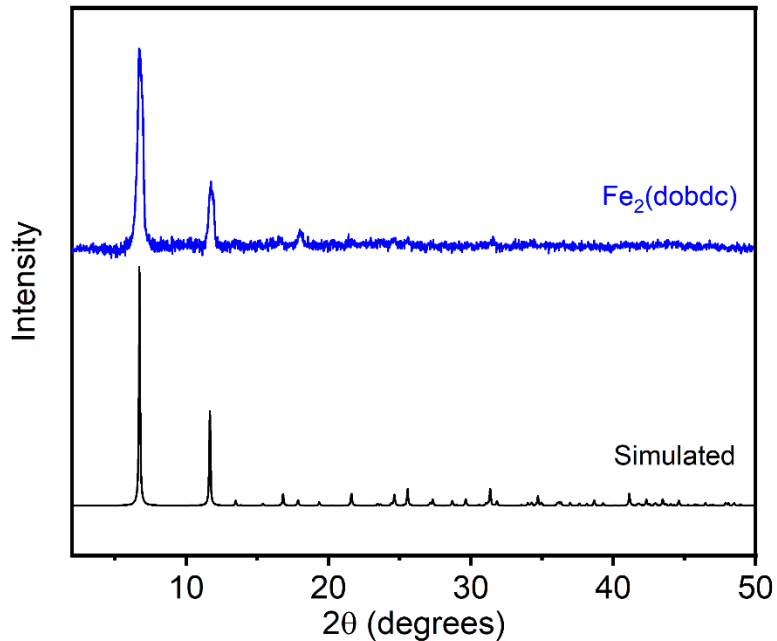

**Figure S39.** PXRD ( $\lambda = 1.54 \text{ \AA}$ ) pattern of activated  $\text{Fe}_2(\text{dobdc})$  measured through a glass capillary. The simulated pattern (black) based on the SCXRD structure of the isostructural MOF  $\text{Zn}_2(\text{dobdc})$  is included for reference.<sup>1</sup>

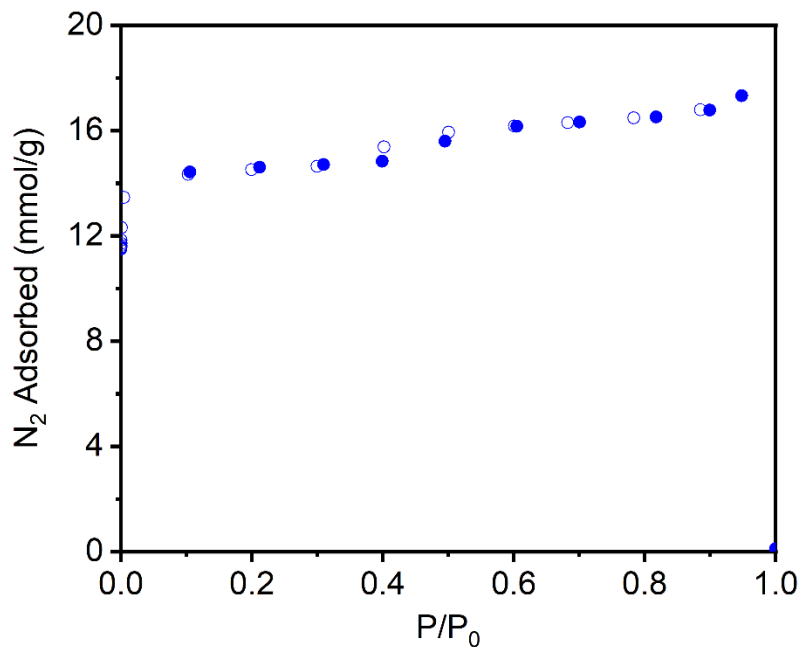

**Figure S40.**  $\text{N}_2$  adsorption (solid circles) and desorption (open circles) isotherms of activated  $\text{Fe}_2(\text{dobdc})$  at 77 K. The Langmuir surface area of this material was determined to be  $1778 \pm 44 \text{ m}^2/\text{g}$  (Literature:  $1536 \text{ m}^2/\text{g}$ ).<sup>8</sup>

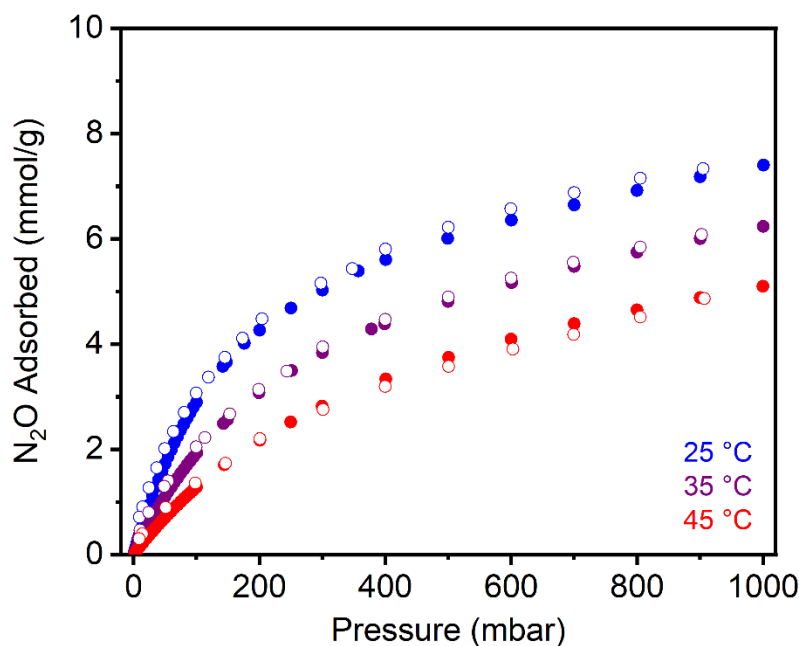

**Figure S41.** N<sub>2</sub>O adsorption (solid circles) and desorption (open circles) isotherms of activated Fe<sub>2</sub>(dobdc) at 25 °C (blue), 35 °C (purple), and 45 °C (red). The sample was reactivated at 180 °C for 24 h under high vacuum (<10 μbar) between isotherms. A data point was considered equilibrated when less than 0.01% change in pressure occurred over a 30 of 60 s interval.

The adsorption data above were not fit to the dual-site Langmuir-Freundlich model due to the instability of Fe<sub>2</sub>(dobdc) in the presence of N<sub>2</sub>O under the measurement conditions. Oxidation reduces the pore volume and may contribute to framework degradation, causing the material to adsorb less gas relative to unreacted Fe<sub>2</sub>(dobdc). These changes are not considered in the dual-site Langmuir-Freundlich model, making fits of the data unrealistic. The gradual depression of the desorption isotherms, relative to their accompanying adsorption isotherms, is consistent with gradual irreversible degradation of the MOF during the adsorption measurements. We believe that this indicates gradual oxidation of the unsaturated Fe(II) sites in the MOF by N<sub>2</sub>O, which becomes more pronounced as the temperature increases.<sup>12</sup> At 45 °C, Fe<sub>2</sub>(dobdc) incorporates less N<sub>2</sub>O in successive measurements at nearly identical pressures, indicating that the N<sub>2</sub>O adsorption behavior of the material has changed in response to the measurement. The gradual color change of the MOF before N<sub>2</sub>O analysis and after each isotherm is consistent with its partial oxidation (Figure S18). Consistently, the Langmuir surface area of the material generally decreases after each successive N<sub>2</sub>O isotherm at increasing temperatures as well (Figure S18).

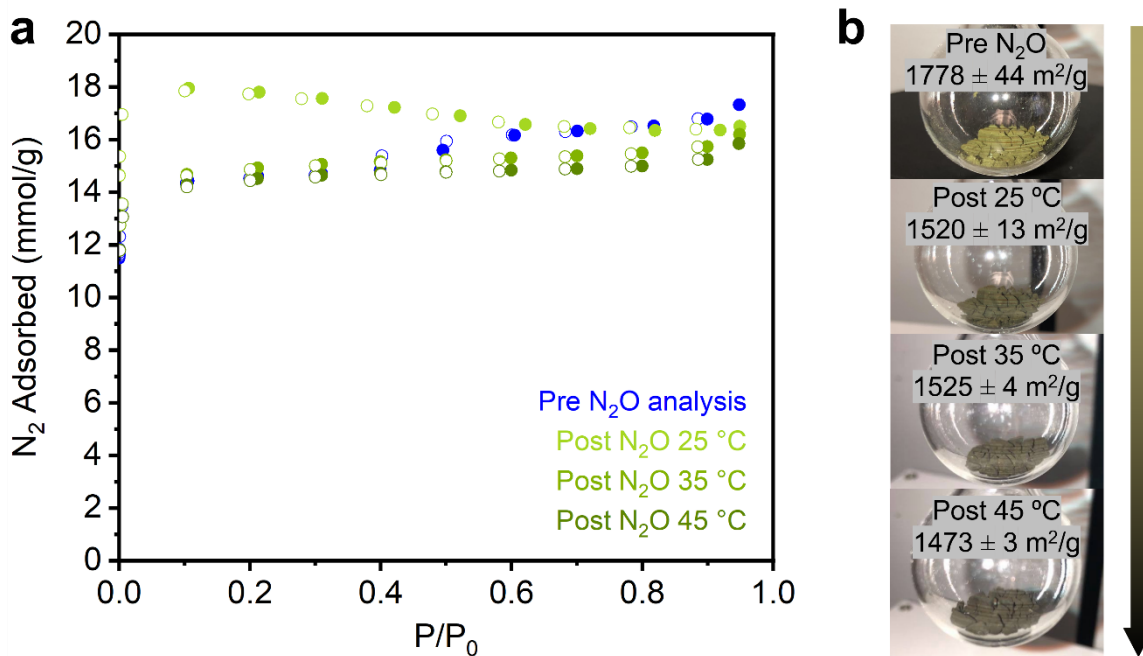

**Figure S42.** a)  $N_2$  adsorption (solid circles) and desorption (open circles) isotherms of activated  $Fe_2(dobdc)$  at 77 K collected before (blue) and after  $N_2O$  adsorption isotherm measurements at 25 °C (light green), 35 °C (green), and 45 °C (dark green). The sample was reactivated at 180 °C for 24 h under high vacuum ( $<10 \mu\text{bar}$ ) between isotherms. b) Langmuir surface areas and images of  $Fe_2(dobdc)$  associated with each measurement.

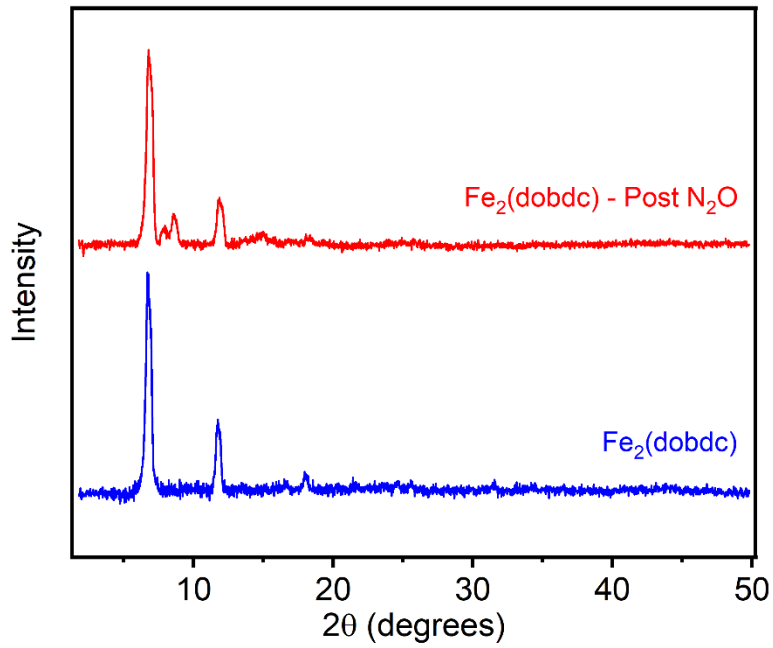

**Figure S43.** PXRD ( $\lambda = 1.54 \text{ \AA}$ ) pattern of activated  $\text{Fe}_2(\text{dobdc})$  after the  $\text{N}_2\text{O}$  adsorption isotherms. The experimental pattern prior to  $\text{N}_2\text{O}$  adsorption isotherms is included for reference.

## 10. Synthesis, characterization, and gas sorption analysis of Co<sub>2</sub>(dobdc).

**Synthesis of Co<sub>2</sub>(dobdc).** Prepared following the previously reported procedure.<sup>13</sup> A 1 L Pyrex jar was charged with Co(NO<sub>3</sub>)<sub>2</sub>·6H<sub>2</sub>O (19.4 g, 66.7 mmol, 3.33 eq.), H<sub>4</sub>dobdc (3.96 g, 20.0 mmol, 1.00 eq.), deionized H<sub>2</sub>O (266 mL), DMF (266 mL), and EtOH (266 mL). The mixture was sonicated until all the solids dissolved. The jar was placed in an oven that had been pre-heated to 100 °C and allowed to stand for 24 h, resulting in precipitation of a dark purple solid from solution. The reaction mixture was allowed to cool to room temperature and filtered. The solid was quickly transferred to a 500 mL Pyrex jar filled with fresh DMF (250 mL). The jar was placed in an oven that had been pre-heated to 120 °C and left to stand 24 h, after which time the non-homogeneous mixture was filtered. The collected solid was returned to the jar with fresh DMF (250 mL). This soaking process was repeated two more times for a total of three hot DMF soaks. After the final soak, the mixture was filtered and transferred to a 500 mL Pyrex jar filled with MeOH (250 mL). The solid was soaked in MeOH for 24 h at 60 °C in an oven three total times following the same procedure as described above. The mixture was filtered again, and the collected solid was quickly transferred to a Schlenk flask under N<sub>2</sub>. The material was activated under flowing N<sub>2</sub> at 180 °C for 4 h, followed by further activation under high vacuum (<100 mbar) at 180 °C for 24 h. The Schlenk flask was transferred into a N<sub>2</sub>-filled glovebox. Activated Co<sub>2</sub>(dobdc) (3.31 g, 53%) was obtained as a dark purple solid. Prior to gas sorption analysis, the material was activated for an additional 24 h under high vacuum (<10 μbar) at 180 °C.

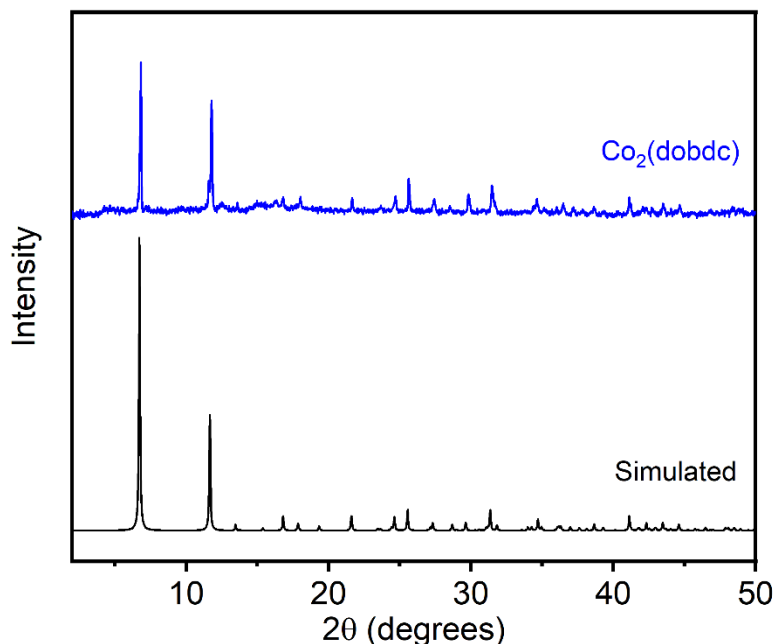

**Figure S44.** PXRD ( $\lambda = 1.54 \text{ \AA}$ ) pattern of activated Co<sub>2</sub>(dobdc). The simulated pattern (black) based on the SCXRD structure of the isostructural MOF Zn<sub>2</sub>(dobdc) is included for reference.<sup>1</sup>

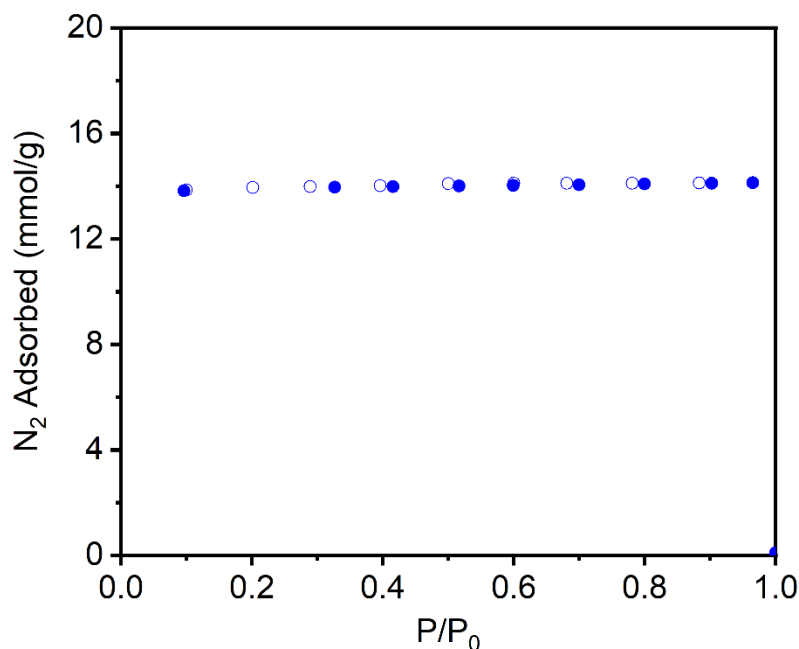

**Figure S45.** N<sub>2</sub> adsorption (solid circles) and desorption (open circles) isotherms of activated Co<sub>2</sub>(dobdc) at 77 K. The Langmuir surface area of this material was determined to be 1377 ± 1 m<sup>2</sup>/g (Literature: 1438 m<sup>2</sup>/g).<sup>8</sup>

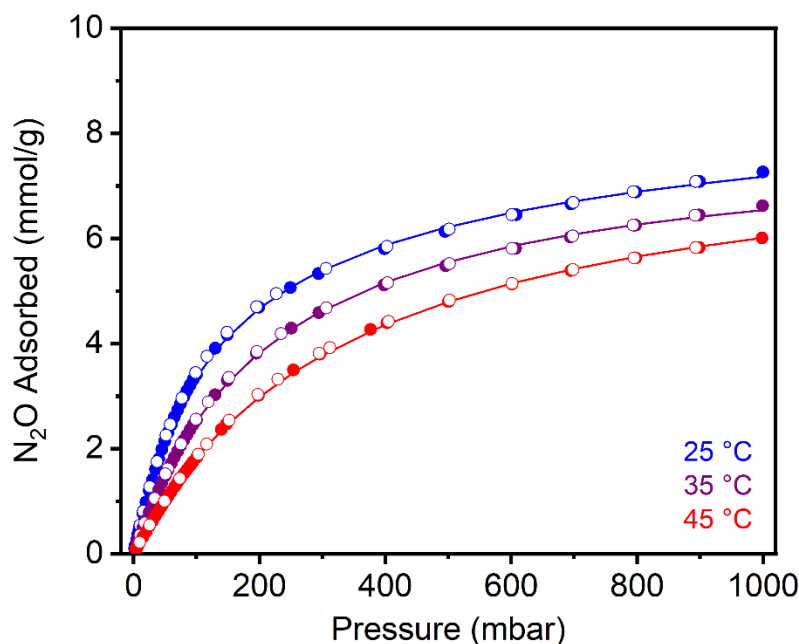

**Figure S46.** N<sub>2</sub>O adsorption (solid circles) and desorption (open circles) isotherms of activated Co<sub>2</sub>(dobdc) at 25 °C (blue), 35 °C (purple), and 45 °C (red). Solid lines represent fits to the dual-site Langmuir-Freundlich model. The sample was reactivated at 180 °C for 24 h under high vacuum (<10 μbar) between isotherms. A data point was considered equilibrated when less than 0.01% change in pressure occurred over a 30 or 60 s interval.

**Table S7.** Langmuir-Freundlich fit parameters determined from the fits in Figure 46.

|                                  | 25 °C | 35 °C | 45 °C |
|----------------------------------|-------|-------|-------|
| <b>Q<sub>sat1</sub> (mmol/g)</b> | 7.00  | 1.30  | 0.925 |
| <b>S1 (in multiples of R)</b>    | 4.46  | 0     | 4.69  |
| <b>E1 (kJ/mol)</b>               | 16.4  | 3.93  | 15.3  |
| <b>V1</b>                        | 1.00  | 1.00  | 1.00  |
| <b>Q<sub>sat2</sub> (mmol/g)</b> | 2.65  | 6.65  | 7.13  |
| <b>S2 (in multiples of R)</b>    | 0.655 | 0.012 | 0.011 |
| <b>E2 (kJ/mol)</b>               | 0.00  | 3.96  | 2.88  |
| <b>V2</b>                        | 1.00  | 1.00  | 1.00  |

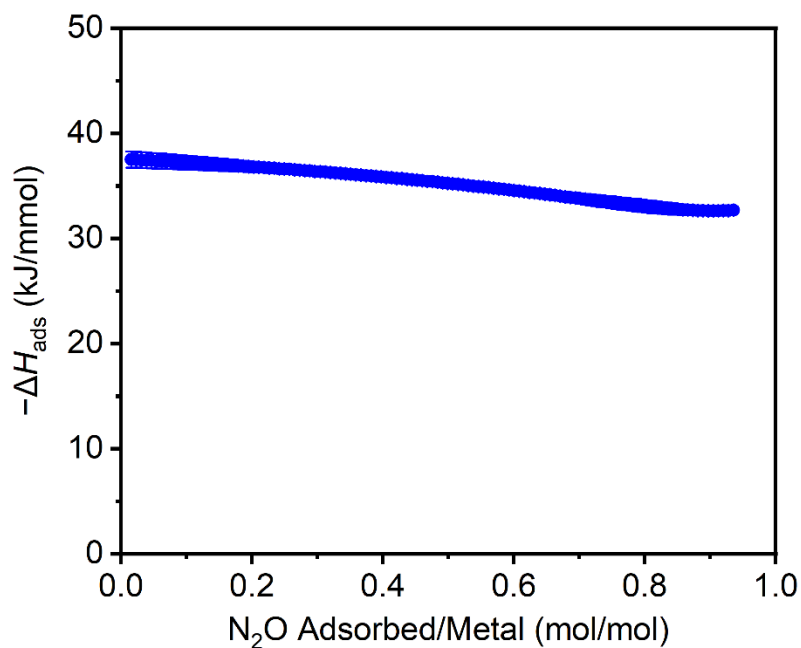

**Figure S47.**  $-\Delta H_{\text{ads}}$  for N<sub>2</sub>O adsorption as a function of uptake per open metal site in Co<sub>2</sub>(dobdc), as determined using the fits in Figure S46.



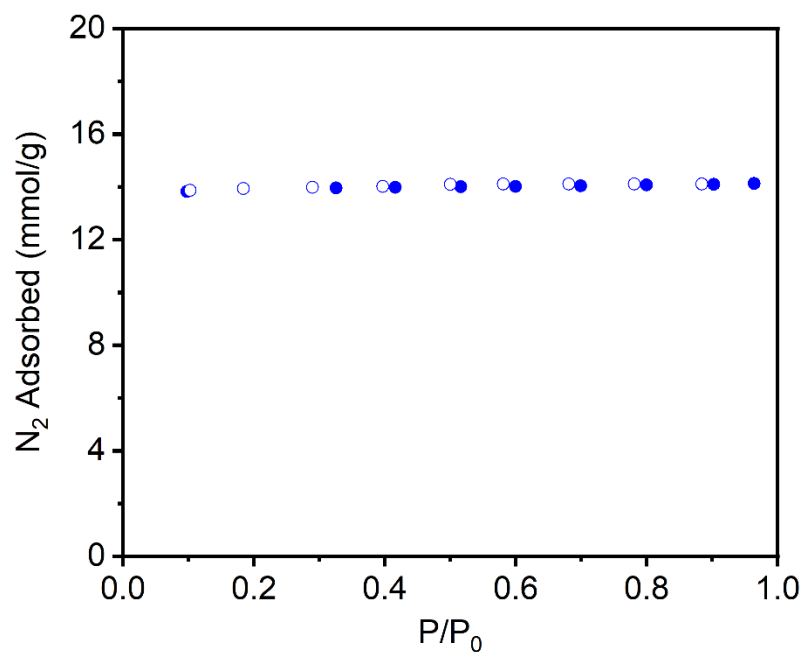

**Figure S48.** N<sub>2</sub> adsorption (solid circles) and desorption (open circles) isotherms of activated Co<sub>2</sub>(dobdc) at 77 K after the N<sub>2</sub>O adsorption isotherms. The Langmuir surface area of this material was determined to be 1377 ± 1 m<sup>2</sup>/g.

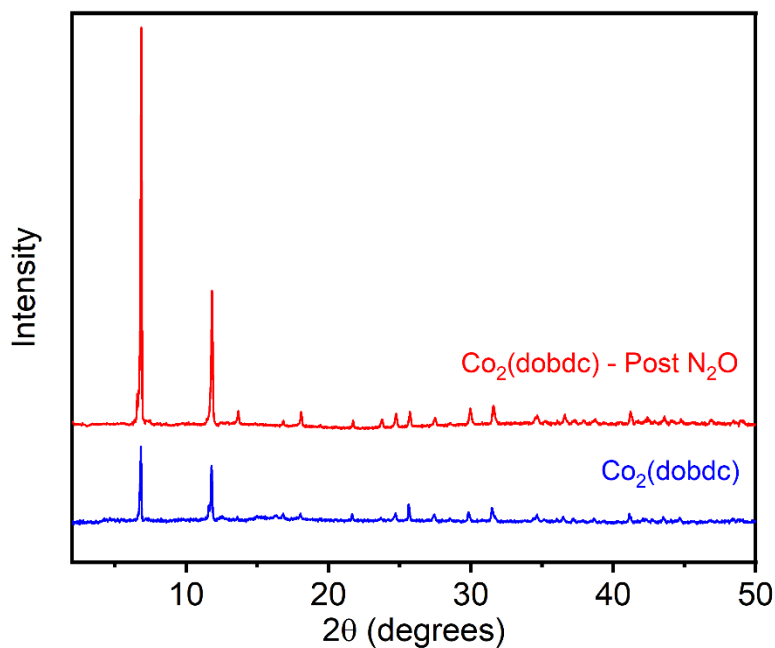

**Figure S49.** PXRD ( $\lambda = 1.54 \text{ \AA}$ ) pattern of activated Co<sub>2</sub>(dobdc) after the N<sub>2</sub>O adsorption isotherms. The experimental pattern prior to N<sub>2</sub>O adsorption isotherms is included for reference.

## 11. Synthesis, characterization, and gas sorption analysis of Ni<sub>2</sub>(dobdc).

**Synthesis of Ni<sub>2</sub>(dobdc).** Prepared according to a modified literature procedure.<sup>14</sup> A 350 mL screw-cap high pressure reaction vessel equipped with a stir bar was charged with Ni(NO<sub>3</sub>)<sub>2</sub>·6H<sub>2</sub>O (5.23 g, 18.0 mmol, 2.51 eq.), H<sub>4</sub>dobdc (1.42 g, 7.17 mmol, 1.00 eq.), fresh DMF (175 mL), and MeOH (21 mL). The mixture was sonicated until all the solids dissolved and then vigorously sparged with N<sub>2</sub> for 1 h. The reaction vessel was sealed, and the reaction mixture was stirred slowly at 120 °C for 14 h, resulting in precipitation of a yellow-brown solid from solution. The mixture was allowed to cool to room temperature and filtered. The collected solid was quickly transferred to a 500 mL Pyrex jar filled with fresh DMF (250 mL). The jar was placed in an oven that had been pre-heated to 100 °C and the jar was left to stand for 24 h, at which time the non-homogeneous mixture was filtered. The collected solid was returned to the jar with fresh DMF (250 mL). This soaking process was repeated two more times for a total of three hot DMF soaks. The mixture was then filtered and the collected solid was transferred to a 500 mL Pyrex jar filled with MeOH (250 mL). The solid was soaked in MeOH for 24 h at 60 °C in an oven three total times following the same procedure as described above. The mixture was filtered again, and the collected solid was quickly transferred to a Schlenk flask under N<sub>2</sub>. The material was activated under flowing N<sub>2</sub> at 180 °C for 24 h, followed by further activation under high vacuum (<100 mbar) at 180 °C for 24 h. The Schlenk flask was transferred into a N<sub>2</sub>-filled glovebox. Activated Ni<sub>2</sub>(dobdc) (0.42 g, 33%) was obtained as a yellow solid. Prior to gas sorption analysis, the material was activated for an additional 24 h under high vacuum (<10 μbar) at 180 °C.

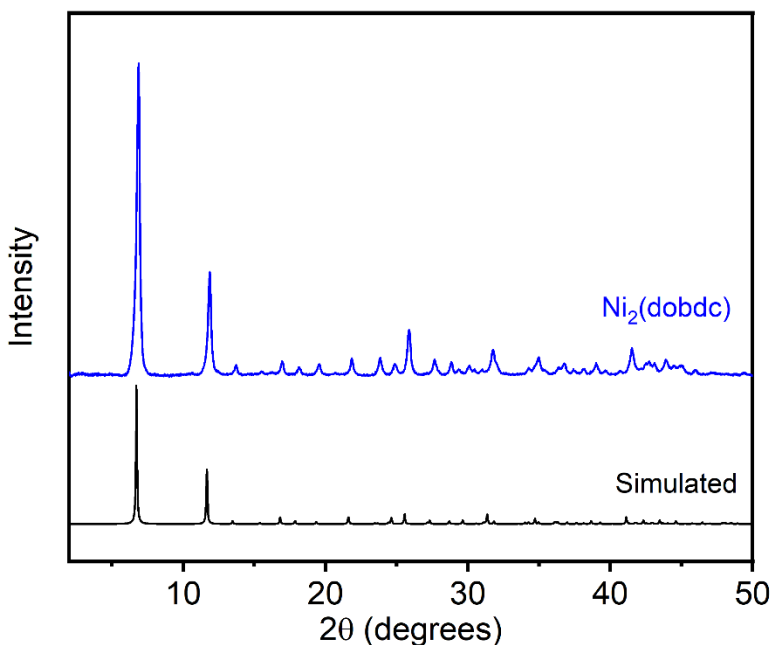

**Figure S50.** PXRD ( $\lambda = 1.54 \text{ \AA}$ ) pattern of MeOH-solvated Ni<sub>2</sub>(dobdc). The simulated pattern (black) based on the SCXRD structure of the isostructural MOF Zn<sub>2</sub>(dobdc) is included for reference.<sup>1</sup>

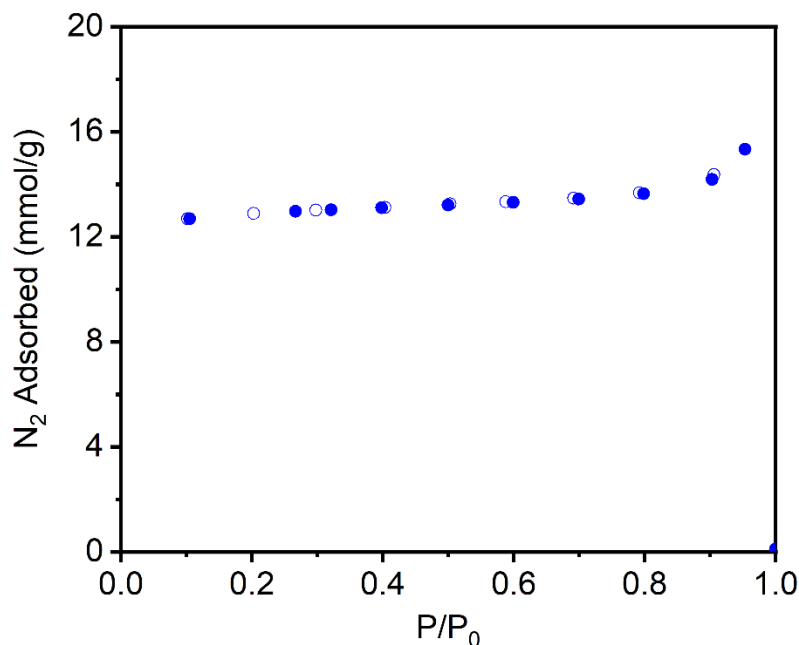

**Figure S51.** N<sub>2</sub> adsorption (solid circles) and desorption (open circles) isotherms of activated Ni<sub>2</sub>(dobdc) at 77 K. The Langmuir surface area of this material was determined to be  $1346 \pm 9$  m<sup>2</sup>/g (Literature: 1574 m<sup>2</sup>/g).<sup>8</sup>

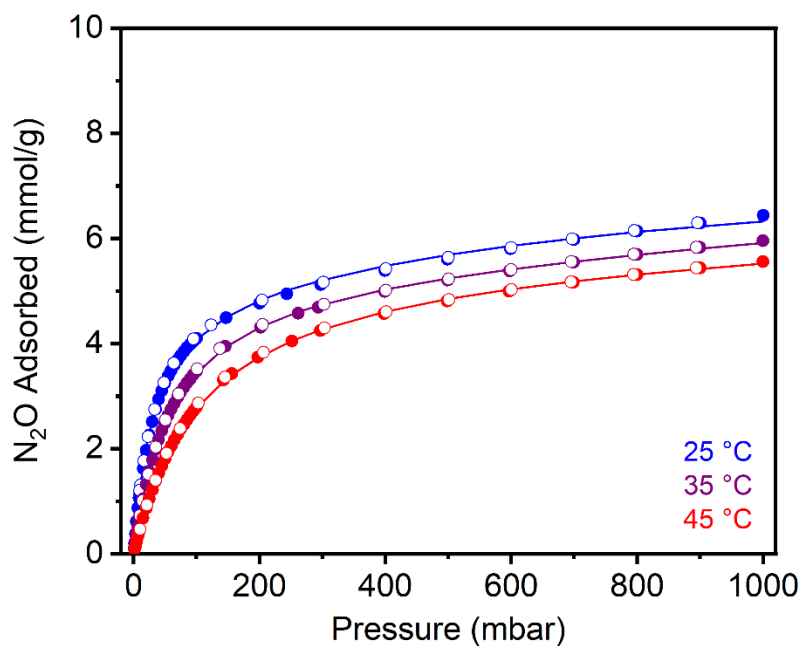

**Figure S52.** N<sub>2</sub>O adsorption (solid circles) and desorption (open circles) isotherms of activated Ni<sub>2</sub>(dobdc) at 25 °C (blue), 35 °C (purple), and 45 °C (red). Solid lines represent fits to the dual-site Langmuir-Freundlich model. The sample was reactivated at 180 °C for 24 h under high vacuum (<10 μbar) between isotherms. A data point was considered equilibrated when less than 0.01% change in pressure occurred over a 30 or 60 s interval.

**Table S8.** Langmuir-Freundlich fit parameters determined from the fits in Figure S52.

|                                  | 25 °C | 35 °C | 45 °C |
|----------------------------------|-------|-------|-------|
| <b>Q<sub>sat1</sub> (mmol/g)</b> | 5.02  | 7.11  | 6.81  |
| <b>S1 (in multiples of R)</b>    | 4.44  | 5.73  | 6.06  |
| <b>E1 (kJ/mol)</b>               | 19.6  | 9.60  | 9.25  |
| <b>V1</b>                        | 1.00  | 1.00  | 1.00  |
| <b>Q<sub>sat2</sub> (mmol/g)</b> | 2.94  | 5.36  | 5.56  |
| <b>S2 (in multiples of R)</b>    | 0.014 | 0.012 | 0.011 |
| <b>E2 (kJ/mol)</b>               | 0.00  | 7.23  | 5.98  |
| <b>V2</b>                        | 1.00  | 1.00  | 1.00  |

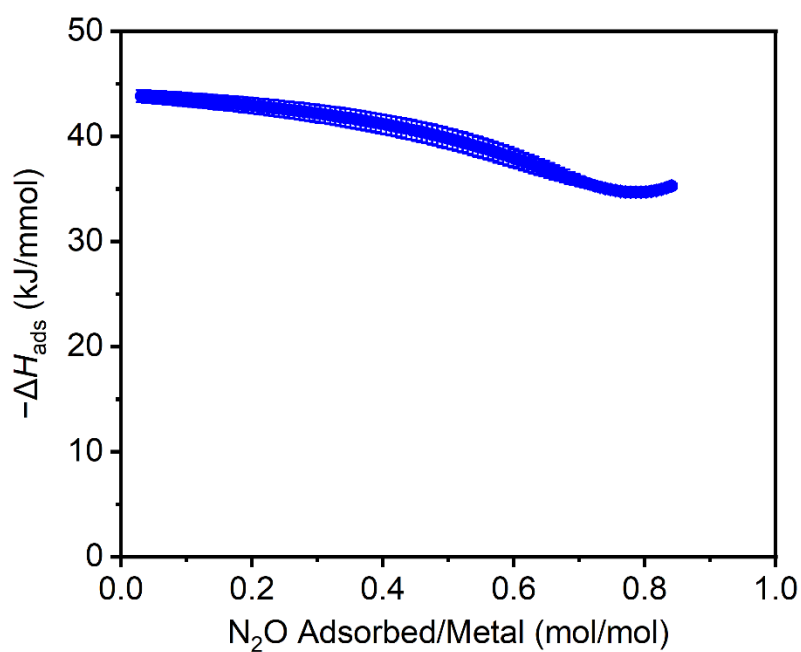

**Figure S53.**  $-\Delta H_{\text{ads}}$  for  $\text{N}_2\text{O}$  adsorption as a function of uptake per open metal site in  $\text{Ni}_2(\text{dobdc})$ , as determined using the fits in Figure S52.

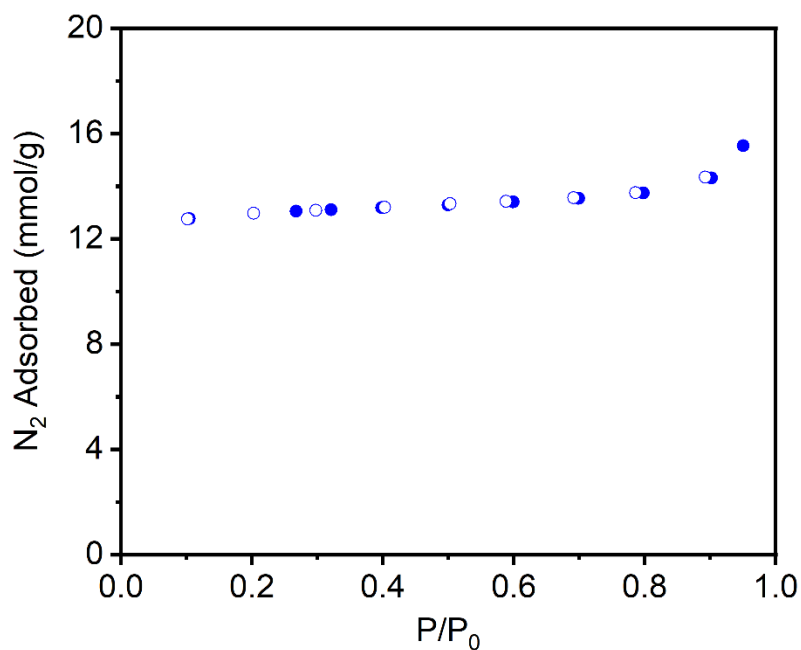

**Figure S54.**  $\text{N}_2$  adsorption (solid circles) and desorption (open circles) isotherms of activated  $\text{Ni}_2(\text{dobdc})$  at 77 K after the  $\text{N}_2\text{O}$  adsorption isotherms. The Langmuir surface area of this material was determined to be  $1357 \pm 9 \text{ m}^2/\text{g}$ .

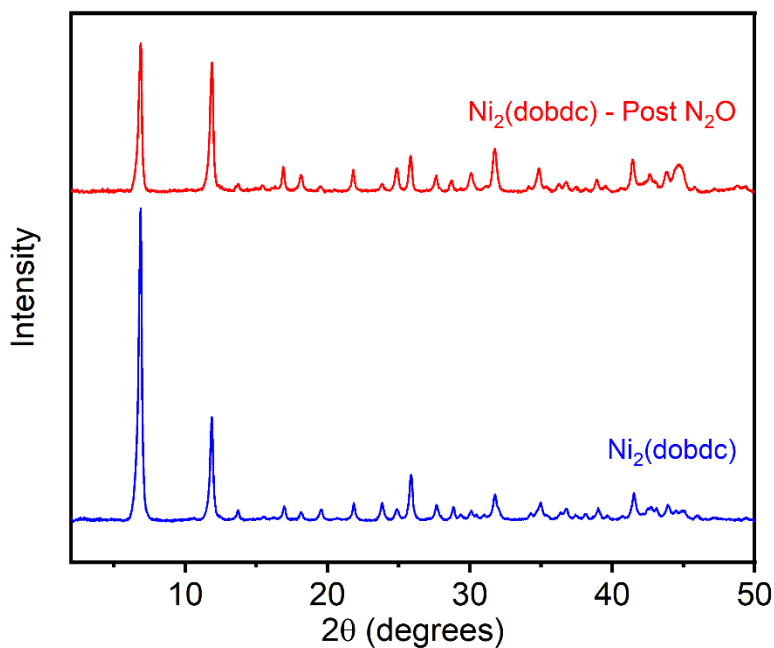

**Figure S55.** PXRD ( $\lambda = 1.54 \text{ \AA}$ ) pattern of activated  $\text{Ni}_2(\text{dobdc})$  after the  $\text{N}_2\text{O}$  adsorption isotherms. The experimental pattern prior to the  $\text{N}_2\text{O}$  adsorption isotherms is included for reference.

## 12. Synthesis, characterization, and gas sorption analysis of Cu<sub>2</sub>(dobdc).

**Synthesis of Cu<sub>2</sub>(dobdc).** Prepared according to a modified literature procedure.<sup>8</sup> A 75 mL screw-capped high pressure reaction vessel was charged with Cu(NO<sub>3</sub>)<sub>2</sub>•6H<sub>2</sub>O (0.445 g, 1.50 mmol, 2.50 equiv.), H<sub>4</sub>dobdc (0.120 g, 0.60 mmol, 1.00 equiv.), *i*PrOH (24 mL), and DMF (16 mL). The mixture was sparged with N<sub>2</sub> for 15 min, then the vessel was capped. The mixture was sonicated until all the solids were dissolved. The vessel was placed in a pre-heated oil bath and allowed to stand at 100 °C for 1 h, resulting in the precipitation of a black powder from solution. The reaction mixture was allowed to cool to room temperature and the supernatant was removed from the settled black solid via pipette. The solid was transferred to a screw-capped jar and suspended in fresh DMF (80 mL), then the mixture was placed in an oven at 70 °C for 12 h. After this time the DMF was removed by filtration and the solids were suspended in fresh DMF (60 mL). This process was repeated five times for a total of six hot DMF soaks. The mixture was then filtered, and the solids were suspended in MeOH (80 mL) in a screw-capped jar. The solid was soaked in MeOH for 12 h at 60 °C in an oven six total times following the same procedure as described above. The mixture was then filtered, and the collected solids were transferred to a Schlenk flask. The solids were activated under flowing N<sub>2</sub> at 180 °C for 1 h, followed by further activation under high vacuum (<100 mbar) at 180 °C for 24 h. The solids were transferred into a N<sub>2</sub>-filled glovebox. Activated Cu<sub>2</sub>(dobdc) was obtained as a black solid. Prior to gas sorption analysis, the material was activated for an additional 24 h under high vacuum (<10 μbar) at 180 °C.

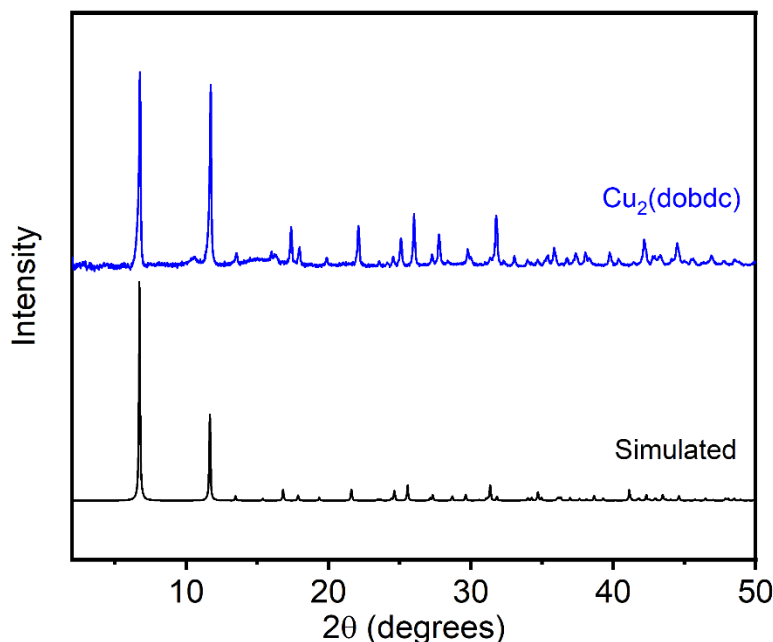

**Figure S56.** PXRD ( $\lambda = 1.54 \text{ \AA}$ ) pattern of MeOH-solvated Cu<sub>2</sub>(dobdc). The simulated pattern (black) based on the SCXRD structure of the isostructural MOF Zn<sub>2</sub>(dobdc) is included for reference.<sup>1</sup>

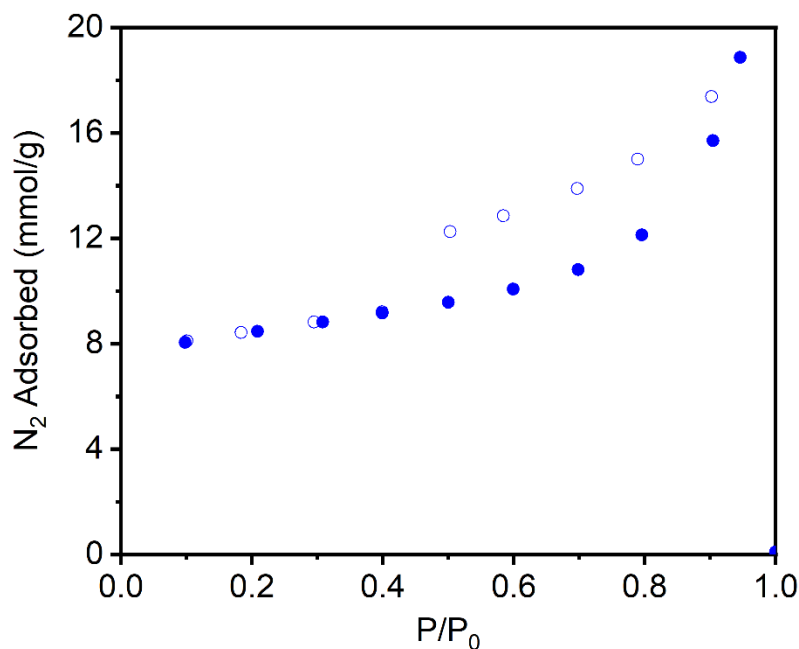

**Figure S57.** N<sub>2</sub> adsorption (solid circles) and desorption (open circles) isotherms of activated Cu<sub>2</sub>(dobdc) at 77 K. The Langmuir surface area of this material was determined to be 1271 ± 81 m<sup>2</sup>/g (Literature: 1515 m<sup>2</sup>/g).<sup>8</sup>

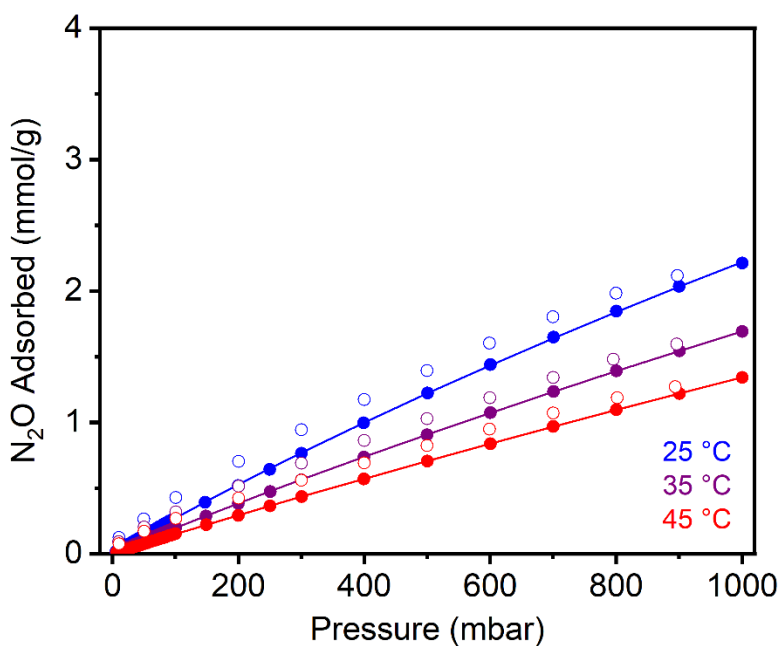

**Figure S58.** N<sub>2</sub>O adsorption (solid circles) and desorption (open circles) isotherms of activated Cu<sub>2</sub>(dobdc) at 25 °C (blue), 35 °C (purple), and 45 °C (red). Solid lines represent fits to the dual-site Langmuir-Freundlich model. The sample was reactivated at 180 °C for 24 h under high vacuum (<10 μbar) between isotherms. A data point was considered equilibrated when less than 0.01% change in pressure occurred over a 30 or 60 s interval.

**Table S9.** Langmuir-Freundlich fit parameters determined from the fits in Figure S58.

|                                  | 25 °C | 35 °C | 45 °C |
|----------------------------------|-------|-------|-------|
| <b>Q<sub>sat1</sub> (mmol/g)</b> | 24.3  | 24.6  | 24.8  |
| <b>S1 (in multiples of R)</b>    | 6.99  | 7.02  | 7.06  |
| <b>E1 (kJ/mol)</b>               | 10.9  | 10.9  | 10.9  |
| <b>V1</b>                        | 1.00  | 1.00  | 1.00  |
| <b>Q<sub>sat2</sub> (mmol/g)</b> | 1.07  | 0.481 | 0.236 |
| <b>S2 (in multiples of R)</b>    | 0.098 | 0.027 | 0.021 |
| <b>E2 (kJ/mol)</b>               | 0.00  | 0.00  | 0.00  |
| <b>V2</b>                        | 1.00  | 1.00  | 1.00  |

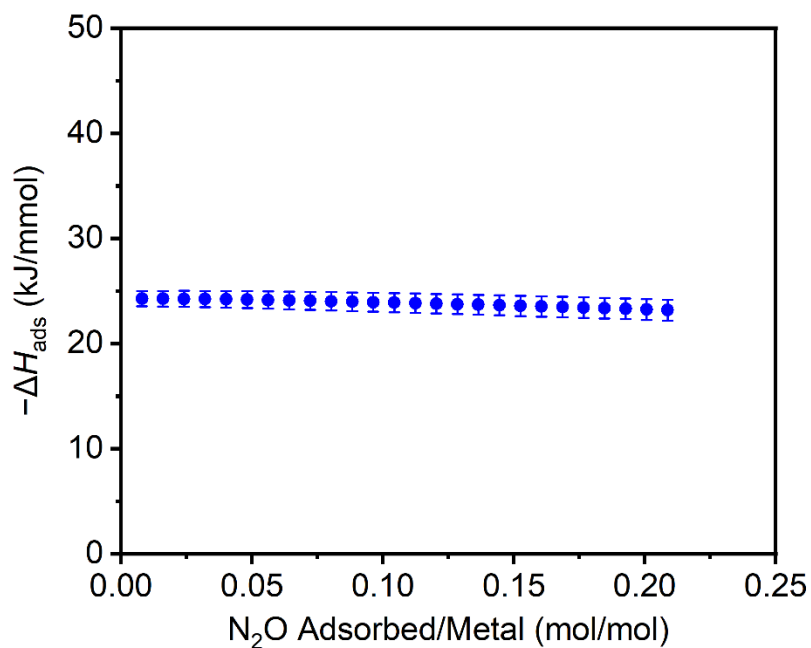

**Figure S59.**  $-\Delta H_{\text{ads}}$  for  $\text{N}_2\text{O}$  adsorption as a function of uptake per open metal site in  $\text{Cu}_2(\text{dobdc})$ , as determined using the fits in Figure S58.



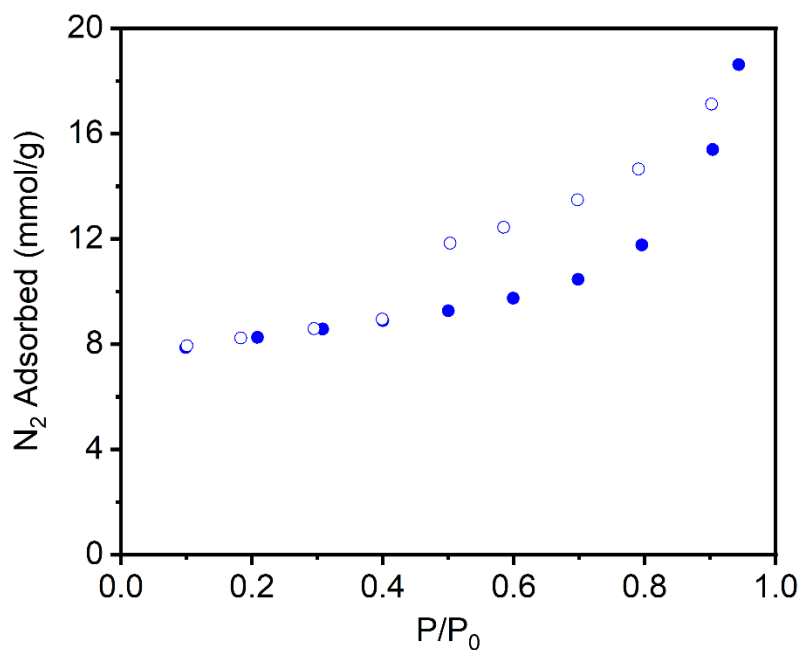

**Figure S60.** N<sub>2</sub> adsorption (solid circles) and desorption (open circles) isotherms of activated Cu<sub>2</sub>(dobdc) at 77 K after the N<sub>2</sub>O adsorption isotherms. The Langmuir surface area of this material was determined to be  $1225 \pm 79$  m<sup>2</sup>/g.

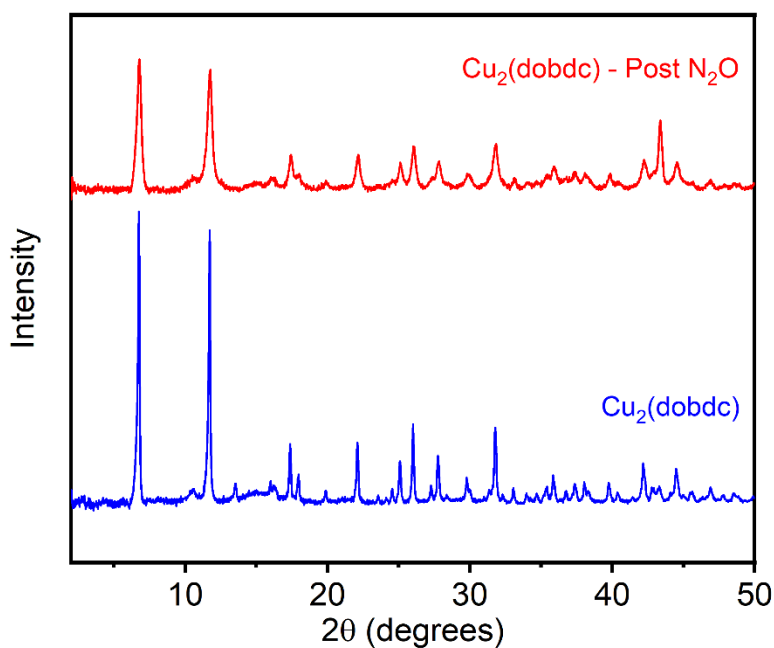

**Figure S61.** PXRD ( $\lambda = 1.54$  Å) pattern of activated Cu<sub>2</sub>(dobdc) after the N<sub>2</sub>O adsorption isotherms. The experimental pattern prior to the N<sub>2</sub>O adsorption isotherms is included for reference.

### 13. Synthesis, characterization, and gas sorption analysis of Zn<sub>2</sub>(dobdc).

**Synthesis of Zn<sub>2</sub>(dobdc).** Prepared according to a modified literature procedure.<sup>7</sup> A 350 mL screw-cap high pressure reaction vessel equipped with a stir bar was charged with Zn(NO<sub>3</sub>)<sub>2</sub>·6H<sub>2</sub>O (2.23 g, 7.50 mmol, 3.00 eq.), H<sub>4</sub>dobdc (0.495 g, 2.50 mmol, 1.00 eq.), DMF (125 mL), and EtOH (125 mL). The mixture was sonicated until all the solids dissolved. The reaction mixture was vigorously sparged with N<sub>2</sub> for 1 h. The reaction vessel was sealed, and the reaction mixture was stirred slowly at 120 °C for 14 h, resulting in precipitation of a yellow powder from solution. The reaction mixture was allowed to cool to room temperature and filtered. The collected solid was quickly transferred to a 500 mL Pyrex jar filled with DMF (250 mL). The jar was placed in an oven that had been pre-heated to 120 °C and left to stand for 24 h, after which time the non-homogeneous mixture was filtered. The collected solid was returned to the jar with fresh DMF (250 mL). This soaking process was repeated two more times for a total of three hot DMF soaks. The mixture was then filtered, and the solids were transferred to a 500 mL Pyrex jar filled with MeOH (250 mL). The solid was soaked in MeOH for 24 h at 60 °C in an oven three total times following the same procedure as described above. The mixture was filtered, and the collected solid was quickly transferred to a Schlenk flask under N<sub>2</sub>. The material was activated under flowing N<sub>2</sub> at 180 °C for 24 h, followed by further activation under high vacuum (<100 mbar) at 180 °C for 24 h. The Schlenk flask was transferred into a N<sub>2</sub>-filled glovebox. Activated Zn<sub>2</sub>(dobdc) (0.799 g, 64%) was obtained as a yellow solid. Prior to gas sorption analysis, the material was activated for an additional 24 h under high vacuum (<10 μbar) at 180 °C.

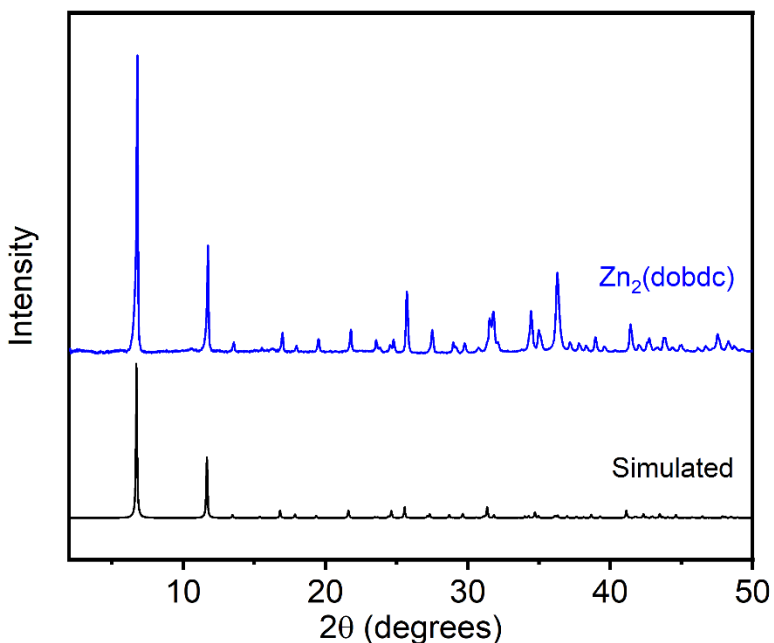

**Figure S62.** PXRD ( $\lambda = 1.54 \text{ \AA}$ ) pattern of MeOH-solvated Zn<sub>2</sub>(dobdc). The simulated pattern (black) based on the SCXRD structure of Zn<sub>2</sub>(dobdc) is included for reference.<sup>1</sup>

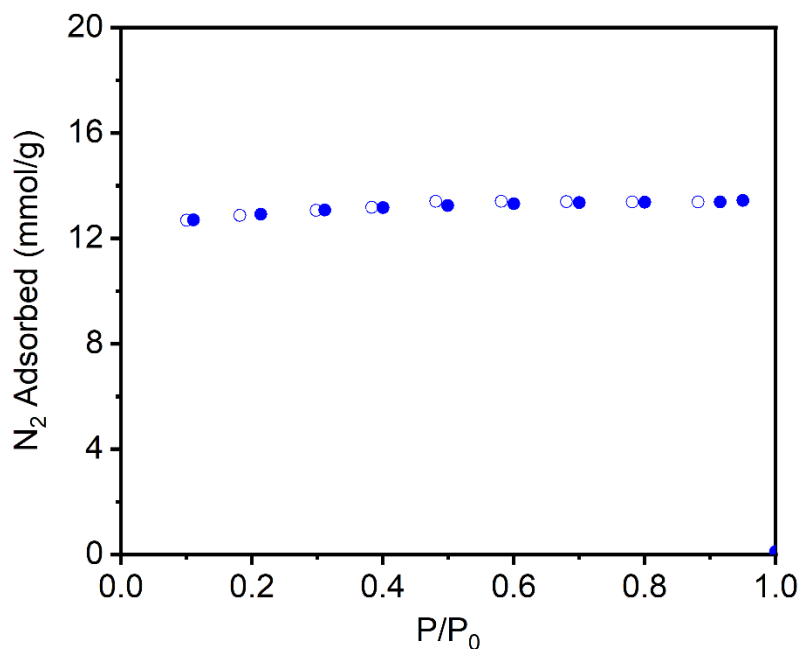

**Figure S63.**  $\text{N}_2$  adsorption (solid circles) and desorption (open circles) isotherms of activated  $\text{Zn}_2(\text{dobdc})$  at 77 K. The Langmuir surface area of this material was determined to be  $1328 \pm 2 \text{ m}^2/\text{g}$  (Literature:  $1277 \text{ m}^2/\text{g}$ ).<sup>8</sup>

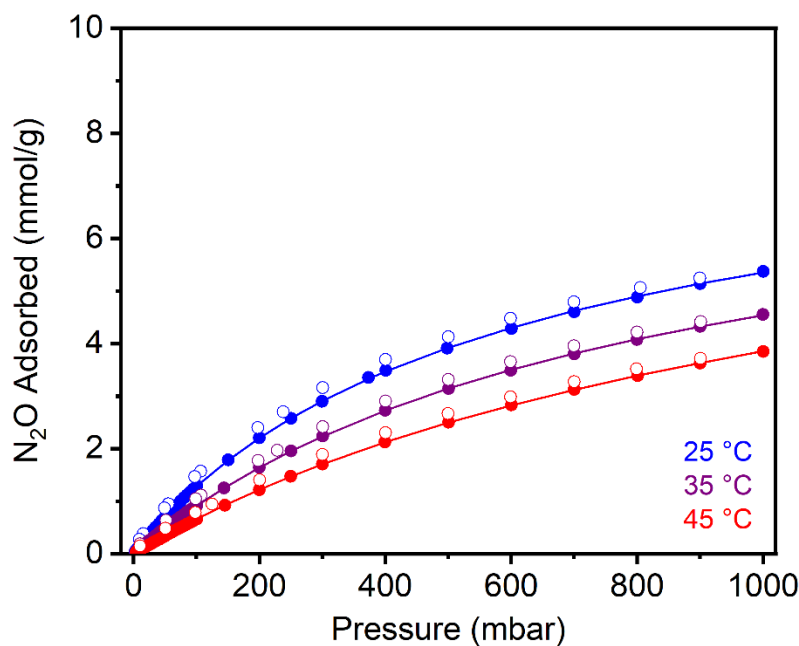

**Figure S64.**  $\text{N}_2\text{O}$  adsorption (solid circles) and desorption (open circles) isotherms of activated  $\text{Zn}_2(\text{dobdc})$  at 25 °C (blue), 35 °C (purple), and 45 °C (red). Solid lines represent fits to the dual-site Langmuir-Freundlich model. The sample was reactivated at 180 °C for 24 h under high vacuum ( $<10 \text{ }\mu\text{bar}$ ) between isotherms. A data point was considered equilibrated when less than 0.01% change in pressure occurred over a 30 or 60 s interval.

**Table S10.** Langmuir-Freundlich fit parameters determined from the fits in Figure S64.

|                                  | 25 °C | 35 °C | 45 °C |
|----------------------------------|-------|-------|-------|
| <b>Q<sub>sat1</sub> (mmol/g)</b> | 4.18  | 3.32  | 3.51  |
| <b>S1 (in multiples of R)</b>    | 4.54  | 6.48  | 4.50  |
| <b>E1 (kJ/mol)</b>               | 13.5  | 6.81  | 7.64  |
| <b>V1</b>                        | 1.00  | 1.00  | 1.00  |
| <b>Q<sub>sat2</sub> (mmol/g)</b> | 4.54  | 7.94  | 6.58  |
| <b>S2 (in multiples of R)</b>    | 0.042 | 0.012 | 0.012 |
| <b>E2 (kJ/mol)</b>               | 0.306 | 0.672 | 0.00  |
| <b>V2</b>                        | 1.00  | 1.00  | 1.00  |

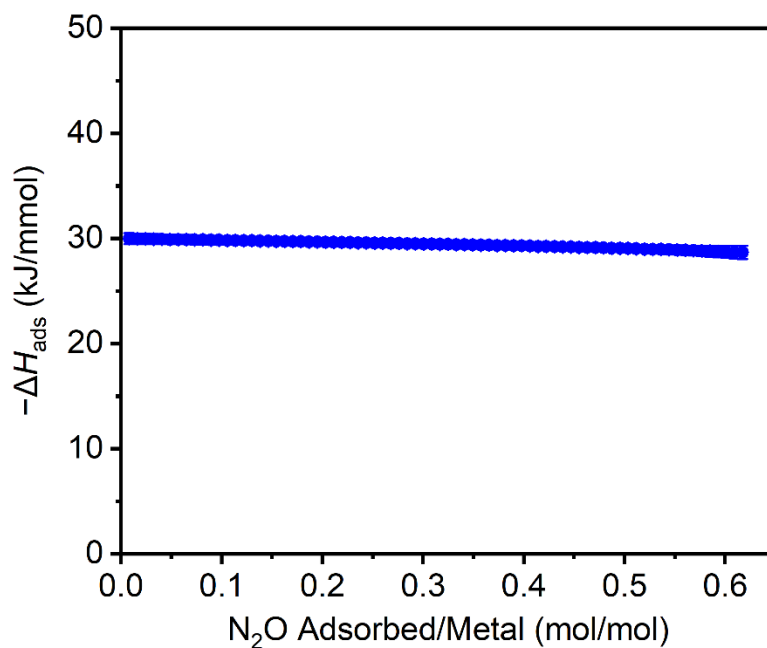

**Figure S65.**  $-\Delta H_{\text{ads}}$  for  $\text{N}_2\text{O}$  adsorption as a function of uptake per open metal site in  $\text{Zn}_2(\text{dobdc})$ , as determined using the fits in Figure S64.

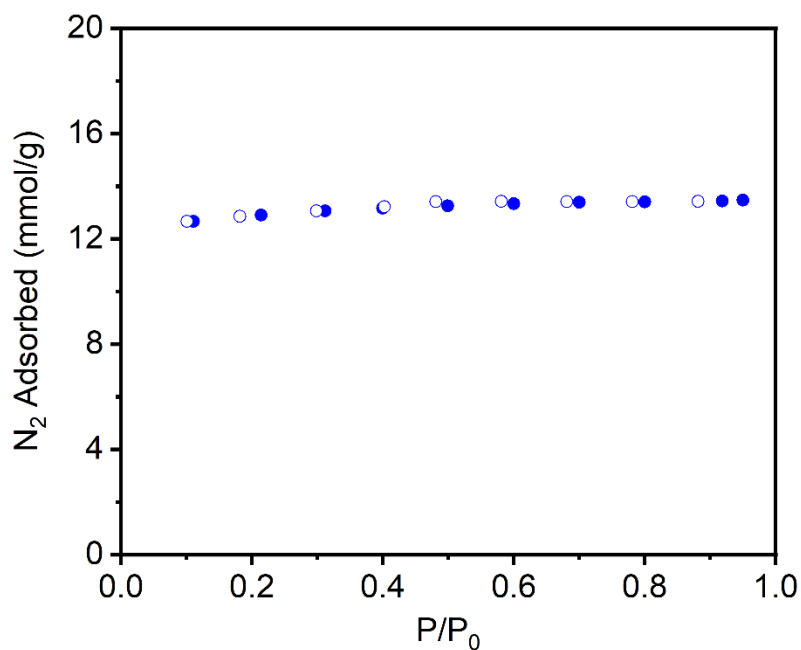

**Figure S66.** N<sub>2</sub> adsorption (solid circles) and desorption (open circles) isotherms of activated Zn<sub>2</sub>(dobdc) after at 77 K after the N<sub>2</sub>O adsorption isotherms. The Langmuir surface area of this material was determined to be  $1334 \pm 2$  m<sup>2</sup>/g.

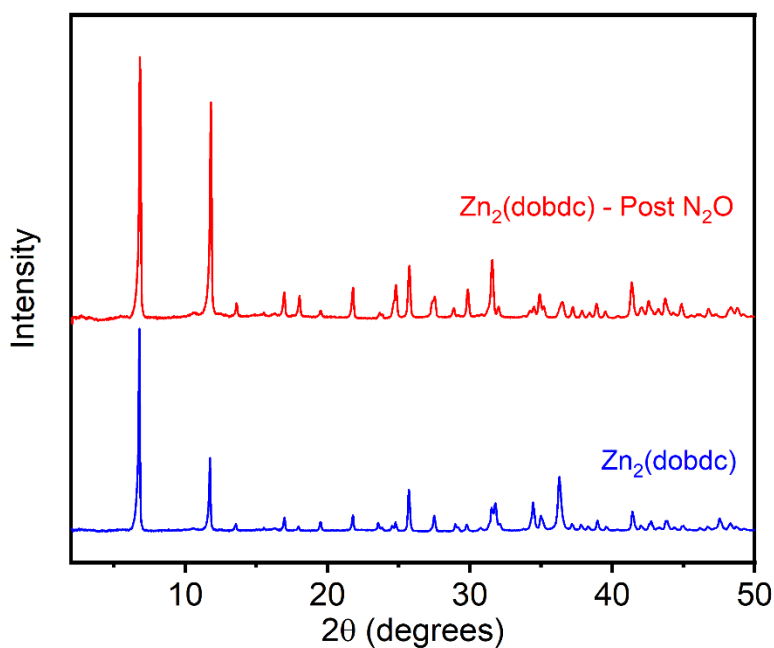

**Figure S67.** PXRD ( $\lambda = 1.54$  Å) pattern of activated Zn<sub>2</sub>(dobdc) after the N<sub>2</sub>O adsorption isotherms. The experimental pattern prior to the N<sub>2</sub>O adsorption isotherms is included for reference.

## 14. Computational studies.

Gas-phase geometry optimizations of MOF cluster models in this work were geometry optimized with density functional theory (DFT) using ORCA v4.0.1.2.<sup>15</sup> The B3LYP<sup>16</sup> global hybrid functional with the empirical D3 dispersion correction<sup>17,18</sup> incorporating the default Becke-Johnson damping was used for all models. Scalar relativistic effects were incorporated by using the zero-order regular approximation (ZORA)<sup>19</sup> with defaults applied in ORCA. All systems were treated as neutral with all M(II) ions in the high-spin state. All metal ions were modelled with the ZORA-def2-TZVPP<sup>20</sup> basis, with all remaining atoms treated with a ZORA-def2-SVP basis. We constrained the position of O atoms in linkers and allowed all other atoms to relax. All calculations made use of the resolution of identity (RI) and chain of sphere (COSX) approximations<sup>21</sup> to accelerate the calculations. We considered two types of spin flips (i.e., at the central metal or in one edge metal) in broken symmetry DFT (BS-DFT)<sup>22</sup> of the system containing three identical metals. The Yamaguchi correction was not applied in these calculations. Geometry optimizations were carried out using default tolerances of  $3 \times 10^{-4}$  hartree/bohr for the maximum gradient and  $5 \times 10^{-6}$  hartree for the self-consistent field (SCF) energy change between steps. The approximate transition state (TS) structure and barrier heights for the oxo formation step were modeled with the climbing image nudged elastic band (CI-NEB) method.<sup>23</sup> The initial and final states were frozen from prior geometry optimizations and contain M–O and O–N bond lengths, respectively, of 2.52 Å and 1.19 Å for the N<sub>2</sub>O adduct and 1.62 Å and 2.98 Å for the Mn(IV)–oxo species. We mapped the reaction coordinate between these states with CI-NEB using a total of 10 images.

The adsorption energy of  $\eta^1$ -N ( $\Delta E_{ads}(\eta^1\text{-N})$ ) and  $\eta^1$ -O ( $\Delta E_{ads}(\eta^1\text{-O})$ ) coordinated N<sub>2</sub>O in the trimetallic and Mg-diluted M<sub>2</sub>(dobdc) clusters was evaluated as follows:

$$\Delta E_{ads}(\eta^1\text{-N}) = E(\text{M-N}_2\text{O}) - E(\text{M}) - E(\text{N}_2\text{O}) \quad \text{eq. S3}$$

$$\Delta E_{ads}(\eta^1\text{-O}) = E(\text{M-ON}_2) - E(\text{M}) - E(\text{N}_2\text{O}) \quad \text{eq. S4}$$

where  $E(\text{M-N}_2\text{O})$  is the energy of the trimetallic or Mg-diluted M<sub>2</sub>(dobdc) cluster model with  $\eta^1$ -N coordinated N<sub>2</sub>O,  $E(\text{M-ON}_2)$  is the energy of the cluster with  $\eta^1$ -O coordinated N<sub>2</sub>O,  $E(\text{M})$  is the energy of the bare cluster, and  $E(\text{N}_2\text{O})$  is the energy of an N<sub>2</sub>O molecule in the gas phase.

**Table S11.** DFT-calculated energies of adsorption ( $\Delta E_{ads}$ ) of  $\eta^1$ -N and  $\eta^1$ -O coordinated  $N_2O$  bound to the open metal site of the trimetallic and Mg-diluted  $M_2(dobdc)$  cluster models.

| Metal     | Energy of adsorption (kJ/mol) |             |             |             |
|-----------|-------------------------------|-------------|-------------|-------------|
|           | Trimetallic                   |             | Mg-diluted  |             |
|           | $\eta^1$ -N                   | $\eta^1$ -O | $\eta^1$ -N | $\eta^1$ -O |
| <b>Mg</b> | -53.4                         | -64.5       | -           | -           |
| <b>Mn</b> | -69.7                         | -68.4       | -43.9       | -48.8       |
| <b>Fe</b> | -53.2                         | -53.7       | -50.0       | -54.8       |
| <b>Co</b> | -53.4                         | -57.7       | -53.7       | -58.3       |
| <b>Ni</b> | -56.9                         | -62.2       | -54.4       | -64.1       |
| <b>Cu</b> | -41.7                         | -46.1       | -47.2       | -46.7       |
| <b>Zn</b> | -49.0                         | -51.9       | -50.4       | -53.7       |

**Table S12.** Bond angles and bond lengths of  $N_2O$  bound to the open metal site of the trimetallic and Mg-diluted  $M_2(dobdc)$  cluster models in  $\eta^1$ -N and  $\eta^1$ -O coordination modes.

| Cluster                 | $\eta^1$ -N                  |                      | $\eta^1$ -O                  |                      |
|-------------------------|------------------------------|----------------------|------------------------------|----------------------|
|                         | $\angle M-N_2O$ ( $^\circ$ ) | M-N ( $\text{\AA}$ ) | $\angle M-ON_2$ ( $^\circ$ ) | M-O ( $\text{\AA}$ ) |
| <b>Mg<sub>3</sub></b>   | 147.6                        | 2.33                 | 119.7                        | 2.27                 |
| <b>Mn<sub>3</sub></b>   | 172.1                        | 1.95                 | 119.5                        | 2.29                 |
| <b>MnMg<sub>2</sub></b> | 115.7                        | 2.52                 | 107.3                        | 2.52                 |
| <b>Co<sub>3</sub></b>   | 122.4                        | 2.41                 | 118.3                        | 2.38                 |
| <b>CoMg<sub>2</sub></b> | 123.5                        | 2.39                 | 118.0                        | 2.37                 |
| <b>Fe<sub>3</sub></b>   | 122.6                        | 2.41                 | 109.5                        | 2.41                 |
| <b>FeMg<sub>2</sub></b> | 121.5                        | 2.47                 | 109.1                        | 2.43                 |
| <b>Ni<sub>3</sub></b>   | 122.2                        | 2.42                 | 117.8                        | 2.34                 |
| <b>NiMg<sub>2</sub></b> | 132.0                        | 2.25                 | 118.7                        | 2.29                 |
| <b>Cu<sub>3</sub></b>   | 108.3                        | 2.57                 | 105.8                        | 2.52                 |
| <b>CuMg<sub>2</sub></b> | 115.3                        | 2.57                 | 105.3                        | 2.54                 |
| <b>Zn<sub>3</sub></b>   | 118.2                        | 2.55                 | 108.2                        | 2.45                 |
| <b>ZnMg<sub>2</sub></b> | 118.9                        | 2.52                 | 108.9                        | 2.44                 |

**Table S13.** Spin multiplicity (i.e.,  $2S+1$ ) of the trimetallic and Mg-diluted  $M_2(dobdc)$  cluster models.

| Metal     | Spin multiplicity |            |
|-----------|-------------------|------------|
|           | Trimetallic       | Mg-diluted |
| <b>Mg</b> | 1                 | -          |
| <b>Mn</b> | 10                | 4          |
| <b>Fe</b> | 13                | 5          |
| <b>Co</b> | 10                | 4          |
| <b>Ni</b> | 7                 | 3          |
| <b>Cu</b> | 4                 | 2          |
| <b>Zn</b> | 1                 | 1          |

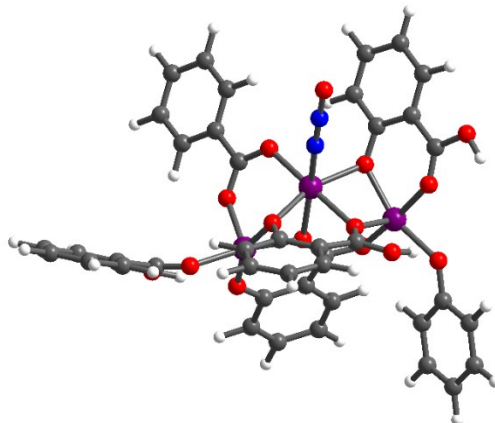

**Figure S68.** DFT-calculated structure of  $\eta^1$ -N coordinated  $\text{N}_2\text{O}$  in the trimetallic Mn-based cluster model. Bond lengths: Mn–N (1.95 Å), N–N (1.13 Å), N–O (1.18 Å).  $\angle\text{M–N}_2\text{O} = 172.1^\circ$ . Purple, blue, gray, red and white spheres represent manganese, nitrogen, carbon, oxygen, and hydrogen atoms, respectively.

The adsorption energy of  $\eta^1$ -N ( $\Delta E_{\text{ads}}(\eta^1\text{-N})$ ) and  $\eta^1$ -O ( $\Delta E_{\text{ads}}(\eta^1\text{-O})$ ) coordinated  $\text{N}_2\text{O}$  in the center or edge metal spin-flipped trimetallic clusters was evaluated using the same procedure as in the previous system. However, the spin orientation of electrons in open shell metals were flipped, as illustrated in Figure S69. Spin densities were visually inspected to ensure the BS-DFT calculations converged to the desired states, and the results of the trimetallic  $\text{Mn}_2(\text{dobdc})$  cluster model are represented in Figure S70.

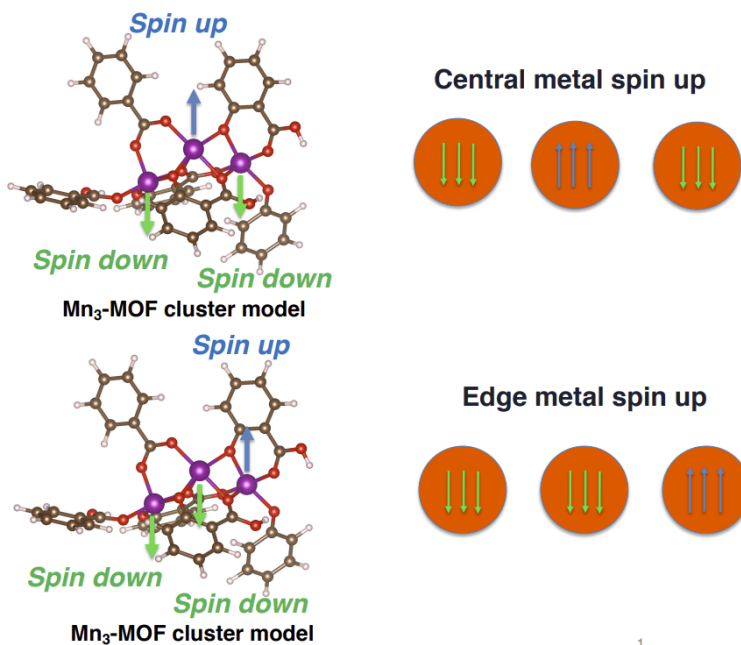

**Figure S69.** Structures of the central and edge metal spin-flipped configurations of the trimetallic  $\text{Mn}_2(\text{dobdc})$  cluster and the corresponding high spin electron configuration of the systems. Purple, brown, red, and white spheres represent manganese, carbon, oxygen, and hydrogen atoms, respectively.



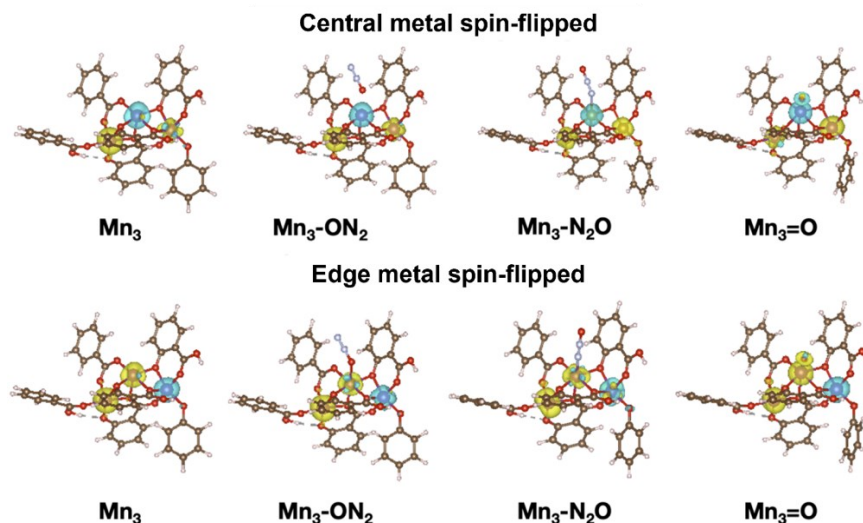

**Figure S70.** Spin densities of the central and edge metal spin-flipped Mn trimetallic cluster models and various intermediates. Yellow and light blue isosurfaces represent positive and negative spin densities, respectively. An isosurface value of 0.01 e/bohr<sup>3</sup> is used for all visualizations. Orange, brown, red, and white spheres represent manganese, carbon, oxygen, and hydrogen atoms, respectively.

**Table S14.** Broken symmetry DFT-calculated energies of adsorption ( $\Delta E_{ads}$ ) of  $\eta^1$ -N and  $\eta^1$ -O coordinated N<sub>2</sub>O bound to the open metal site of the open shell trimetallic M<sub>2</sub>(dobdc) cluster models in central or edge metal spin-flipped configurations.

| Metal | Energy of adsorption (kJ/mol) |             |             |             |
|-------|-------------------------------|-------------|-------------|-------------|
|       | Central Metal                 |             | Edge Metal  |             |
|       | $\eta^1$ -N                   | $\eta^1$ -O | $\eta^1$ -N | $\eta^1$ -O |
| Mn    | 119.3                         | -252.2      | 299.9       | 116.3       |
| Fe    | -290.7                        | -291.2      | -53.1       | -53.6       |
| Co    | -251.2                        | -255.5      | -53.3       | -57.7       |
| Ni    | -56.8                         | -62.1       | -56.7       | -57.1       |
| Cu    | -46.9                         | -46.1       | -44.8       | -46.1       |

The energies of M(IV)-oxo formation ( $\Delta E_f(M^{(n+2)}\text{-oxo})$ ) in the trimetallic and Mg-diluted M<sub>2</sub>(dobdc) cluster models was evaluated as follows:

$$\Delta E_f(M^{(n+2)}\text{-oxo}) = E(M^{(n+2)}\text{-oxo}) + E(N_2) - E(M^n) - E(N_2O) \quad \text{eq. S5}$$

where  $E(M^{(n+2)}\text{-oxo})$  is the energy of the oxo-containing trimetallic or Mg-diluted M<sub>2</sub>(dobdc) cluster,  $E(M^n)$  is the energy of the bare cluster,  $E(N_2)$  is the energy of an N<sub>2</sub> molecule in the gas phase, and  $E(N_2O)$  is the energy of an N<sub>2</sub>O molecule in the gas phase.

**Table S15.** DFT-calculated energies of M(IV)–oxo formation ( $\Delta E_f(\text{M-oxo})$ ) in the trimetallic and Mg-diluted  $\text{M}_2(\text{dobdc})$  cluster models.

| Metal | M(IV)-oxo formation (kJ/mol) |            |
|-------|------------------------------|------------|
|       | Trimetallic                  | Mg-diluted |
| Mg    | 96.7                         | 96.7       |
| Mn    | -183.1                       | -176.1     |
| Fe    | -55.5                        | -52.7      |
| Co    | 28.5                         | 9.9        |
| Ni    | 104.2                        | 73.0       |
| Cu    | 104.6                        | 64.9       |
| Zn    | 96.8                         | 89.6       |

**Table S16.** DFT-calculated M–O bond lengths in M(IV)–oxo ( $\text{\AA}$ ) trimetallic and Mg-diluted  $\text{M}_2(\text{dobdc})$  cluster models.

| Metal | M(IV)-oxo bond length ( $\text{\AA}$ ) |            |
|-------|----------------------------------------|------------|
|       | Trimetallic                            | Mg-diluted |
| Mg    | 1.93                                   | 1.93       |
| Mn    | 1.62                                   | 1.62       |
| Co    | 1.63                                   | 1.67       |
| Fe    | 1.61                                   | 1.60       |
| Ni    | 2.41                                   | 1.84       |
| Cu    | 1.82                                   | 1.82       |
| Zn    | 1.89                                   | 1.90       |

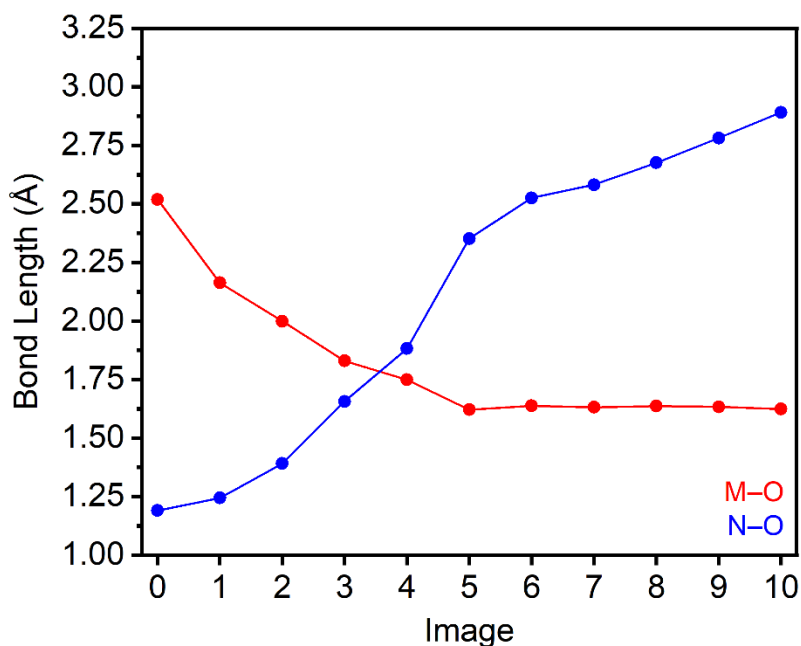

**Figure S71.** Image number vs. bond length of M–O (red) and N–O (blue) bonds in the CI-NEB calculated reaction coordinate for the activation of  $\text{N}_2\text{O}$  in the Mg-diluted  $\text{Mn}_2(\text{dobdc})$  model.

## 15. High-temperature N<sub>2</sub>O studies in Mn<sub>2</sub>(dobdc)

**Bulk high-temperature N<sub>2</sub>O dosing procedure:** Mn<sub>2</sub>(dobdc) (107 mg) was dosed with N<sub>2</sub>O at 300 °C gradually by performing an N<sub>2</sub>O gas sorption measurement at that temperature, starting at very low pressure (<10 mbar) and increasing incrementally up to 1000 mbar then gradually returning to <10 mbar over approximately 26 h. The temperature was maintained throughout the measurement using a sand bath with an internal thermometer. The sample was activated at 300 °C for 24 h under high vacuum (<10 μbar) prior to N<sub>2</sub>O dosing.

**Variable-temperature DRIFTS analysis:** Mn<sub>2</sub>(dobdc) was prepared for DRIFTS analysis by mixing it with KBr in an N<sub>2</sub>-filled glovebox (~1:2 MOF:KBr by volume), then quickly transferring the mixture to the sample chamber outside of the box. The chamber was immediately sealed and activated for 24 h at 180 °C under high vacuum (<50 mTorr). After activation, the sample chamber was allowed to cool to room temperature and then backfilled with N<sub>2</sub>O. The spectrum of activated Mn<sub>2</sub>(dobdc) mixed with KBr under N<sub>2</sub>O was collected at 25 °C and subtracted from subsequent spectra collected on the identical sample to emphasize any new stretching frequencies attributed to Mn-oxo formation. The sample chamber was then heated to 300 °C under static N<sub>2</sub>O and held at that temperature for 15 h. Spectra were collected periodically throughout the duration of the measurement.

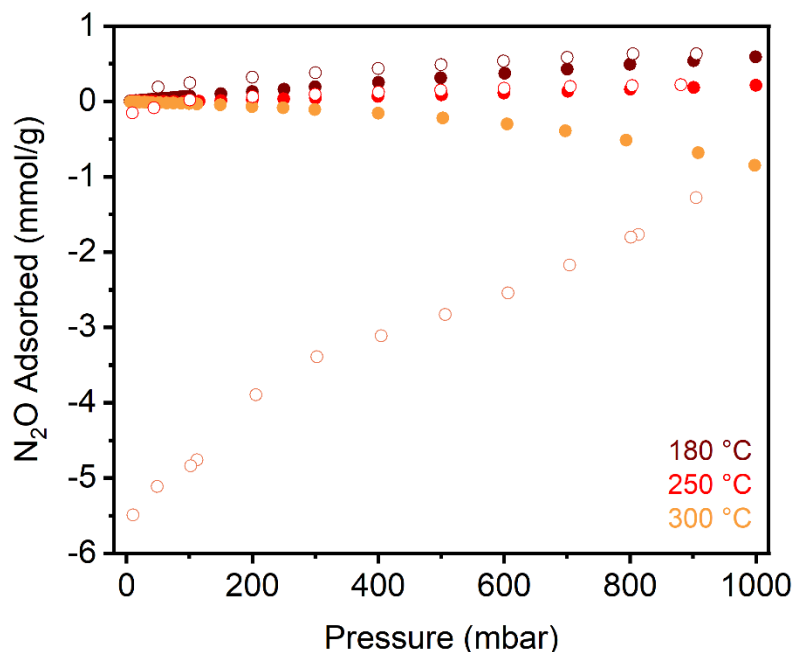

**Figure S72.** N<sub>2</sub>O adsorption (solid circles) and desorption (open circles) isotherms of activated Mn<sub>2</sub>(dobdc) at 180 °C (dark red), 250 °C (red), and 300 °C (orange). The sample was reactivated at the temperature of its subsequent adsorption measurement for 24 h under high vacuum (<10 μbar) between isotherms. A data point was considered equilibrated when less than 0.01% change in pressure occurred over a 30 or 60 s interval.

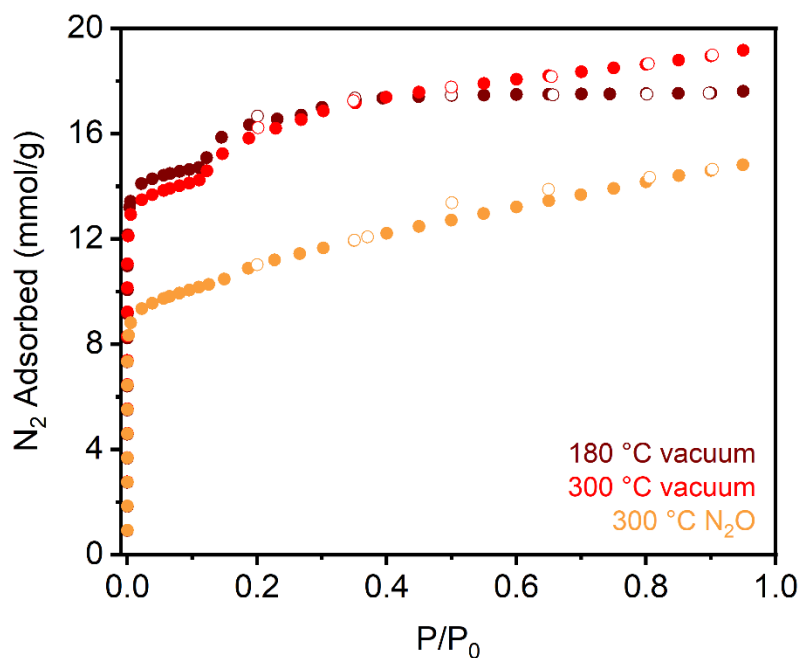

**Figure S73.**  $\text{N}_2$  adsorption (solid circles) and desorption (open circles) isotherms of activated  $\text{Mn}_2(\text{dobdc})$  at 77 K measured after activation for 24 h at 180 °C (dark red) and 300 °C (red), and after  $\text{N}_2\text{O}$  dosing at 300 °C (orange). The Brunauer-Emmett-Teller (BET) surface areas were determined to be  $1344 \pm 3 \text{ m}^2/\text{g}$  after 180 °C activation,  $1285 \pm 3 \text{ m}^2/\text{g}$  after 300 °C activation, and  $896 \pm 2 \text{ m}^2/\text{g}$  after  $\text{N}_2\text{O}$  dosing at 300 °C.

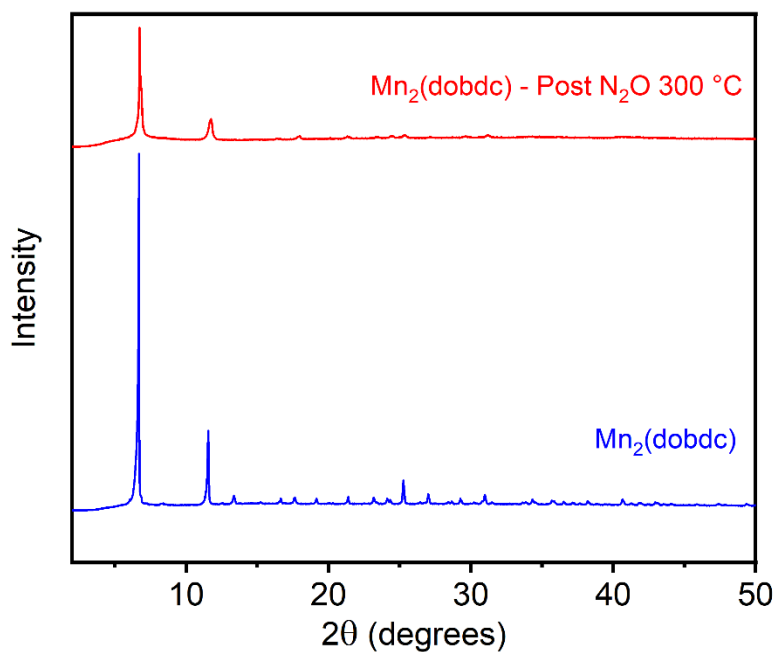

**Figure S74.** PXRD ( $\lambda = 1.54 \text{ \AA}$ ) pattern of activated  $\text{Mn}_2(\text{dobdc})$  after  $\text{N}_2\text{O}$  dosing at 300 °C. The experimental pattern prior to  $\text{N}_2\text{O}$  dosing is included for reference.

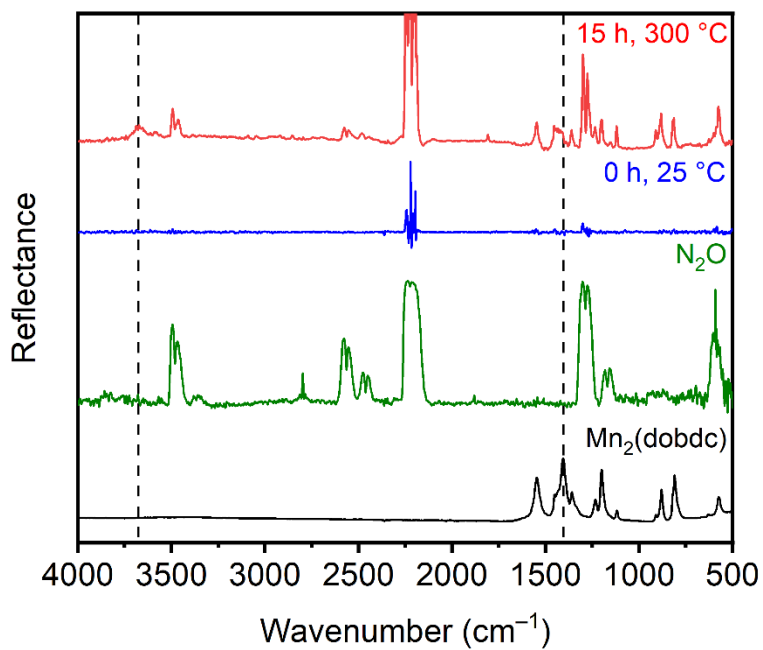

**Figure S75.** Variable-temperature DRIFTS spectra collected under an atmosphere of N<sub>2</sub>O (approx. 1 bar) at 25 °C after 0 h (blue) and 300 °C (red) after 15 h. The DRIFTS spectrum of free N<sub>2</sub>O (green) and the ATR-IR spectrum of Mn<sub>2</sub>(dobdc) (black) are included for reference. Dotted lines denote changes in the spectrum after N<sub>2</sub>O treatment.

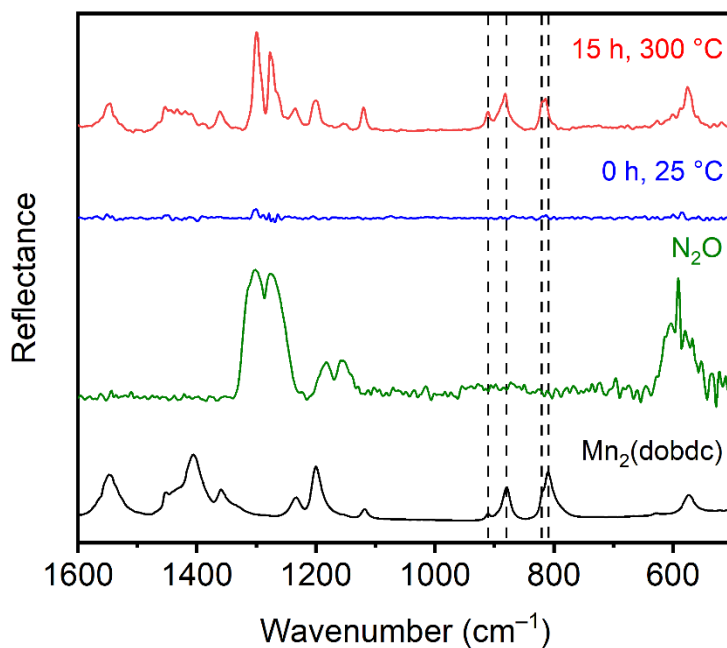

**Figure S76.** Magnified variable-temperature DRIFTS spectra collected under an atmosphere of  $\text{N}_2\text{O}$  (approx. 1 bar) at 25 °C after 0 h (blue) and 300 °C (red) after 15 h, showing no new stretching frequencies in the region expected for Mn(IV)-oxo formation ( $\sim 845 \text{ cm}^{-1}$ ).<sup>24</sup> The DRIFTS spectrum of free  $\text{N}_2\text{O}$  (green) and the ATR-IR spectrum of  $\text{Mn}_2(\text{dobdc})$  (black) are included for reference. Dotted lines marking  $\text{Mn}_2(\text{dobdc})$  stretching frequencies are included as visual aids. The stretches that appear after heating to 300 °C match those of unreacted  $\text{Mn}_2(\text{dobdc})$  and free  $\text{N}_2\text{O}$ . Their prevalence despite subtracting the 25 °C  $\text{N}_2\text{O}$ -dosed spectrum of this sample from all measurements is attributed to thermal excitement at elevated temperatures.

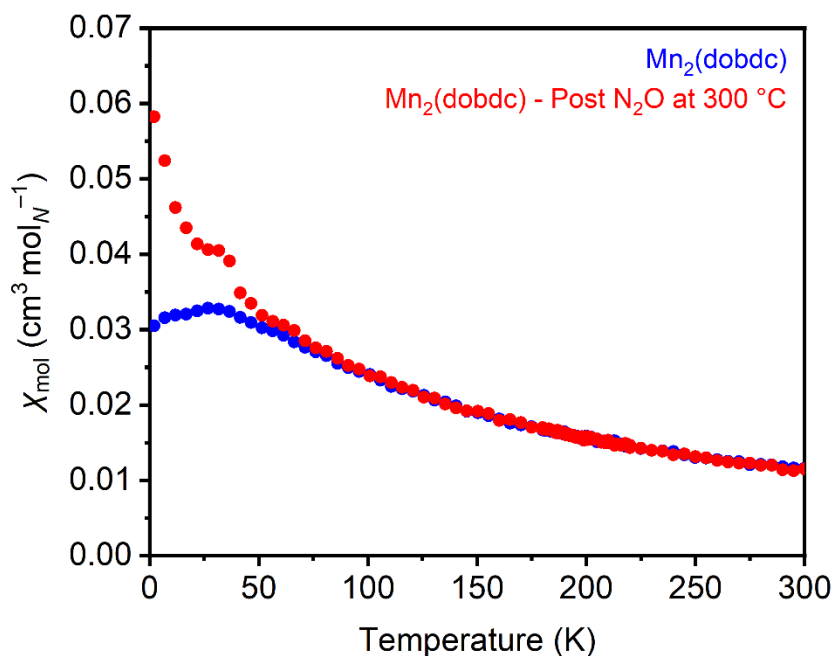

**Figure S77.** Zero field cooled (ZFC) variable-temperature molar magnetic susceptibility ( $\chi_{\text{mol}}$ ) measurements of  $\text{Mn}_2(\text{dobdc})$  before (blue) and after (red)  $\text{N}_2\text{O}$  dosing at  $300\text{ }^\circ\text{C}$  under an applied field of 1000 Oe.

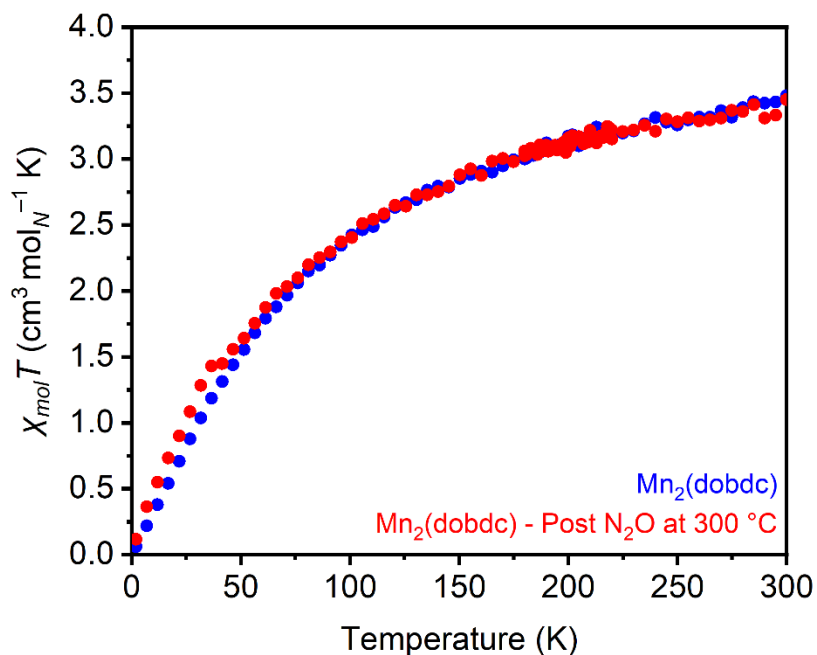

**Figure S78.** ZFC variable-temperature temperature-adjusted molar magnetic susceptibility ( $\chi_{\text{mol}}T$ ) measurements of  $\text{Mn}_2(\text{dobdc})$  before (blue) and after (red)  $\text{N}_2\text{O}$  dosing at  $300\text{ }^\circ\text{C}$  under an applied field of 1000 Oe.

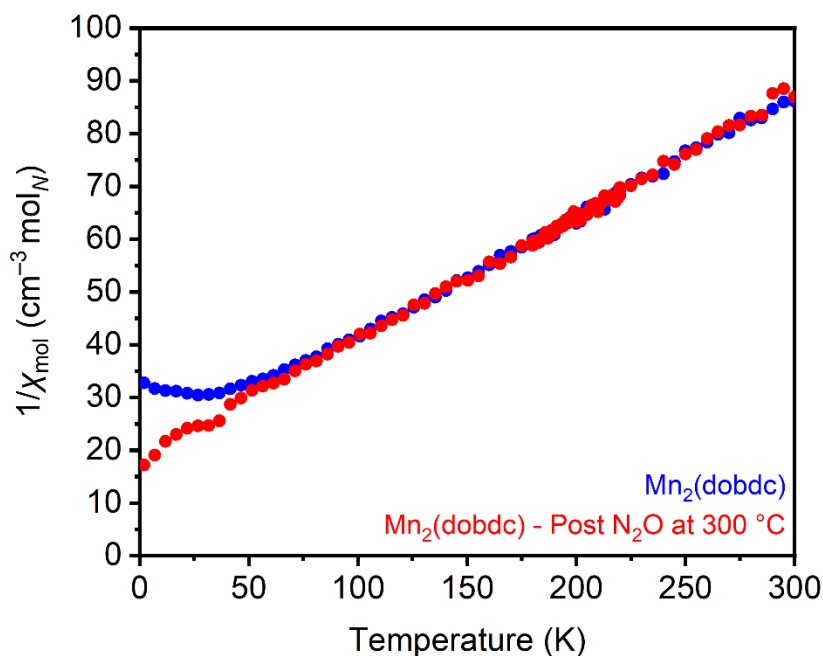

**Figure S79.** ZFC variable-temperature inverse molar magnetic susceptibility ( $1/\chi_{\text{mol}}$ ) measurements of  $\text{Mn}_2(\text{dobdc})$  before (blue) and after (red)  $\text{N}_2\text{O}$  dosing at  $300\text{ }^\circ\text{C}$  under an applied field of 1000 Oe.

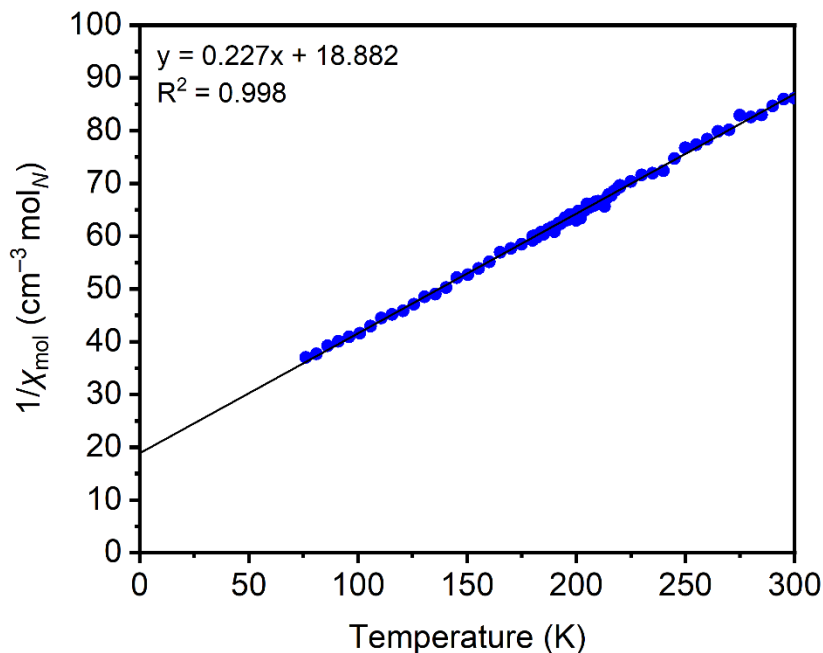

**Figure S80.** Fit of the inverse molar magnetic susceptibility ( $1/\chi_{\text{mol}}$ ) of  $\text{Mn}_2(\text{dobdc})$  within the region (75–300 K) where the data are linear. The effective magnetic moment ( $\mu_{\text{eff}}$ ) of  $\text{Mn}_2(\text{dobdc})$  calculated from this fit is 5.94 Bohr magnetons ( $\mu\text{B}$ ) (theoretical  $\mu_{\text{eff}}$  for an  $S = 5/2$  system: 5.92  $\mu\text{B}$ ).



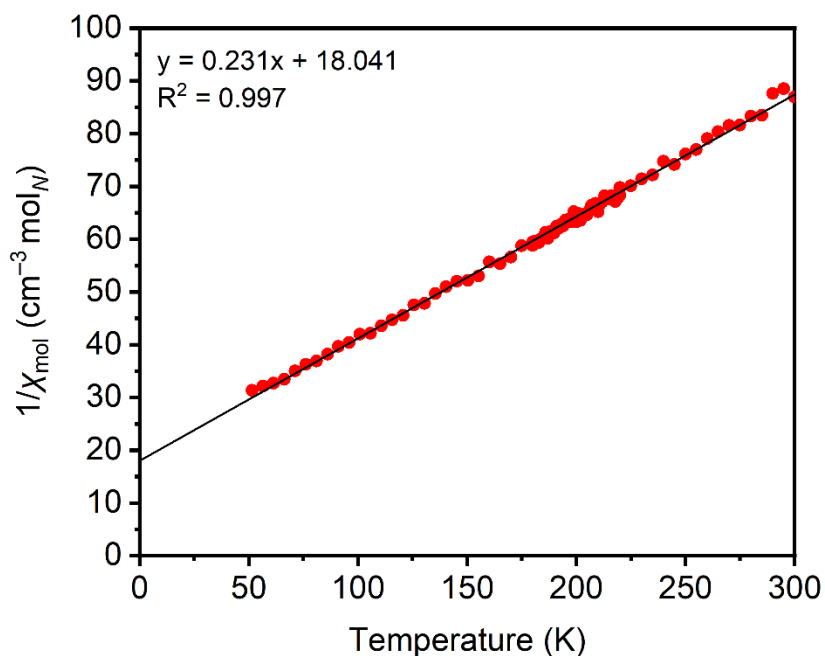

**Figure S81.** Fit of the inverse molar magnetic susceptibility ( $1/\chi_{\text{mol}}$ ) of  $\text{Mn}_2(\text{dobdc})$  after  $\text{N}_2\text{O}$  treatment at  $300\text{ }^\circ\text{C}$  within the region (50–300 K) where the data are linear. The effective magnetic moment ( $\mu_{\text{eff}}$ ) of  $\text{Mn}_2(\text{dobdc})$  calculated from this fit is 5.89 Bohr magnetons ( $\mu\text{B}$ ) (theoretical  $\mu_{\text{eff}}$  for an  $S = 5/2$  system: 5.92  $\mu\text{B}$ ).

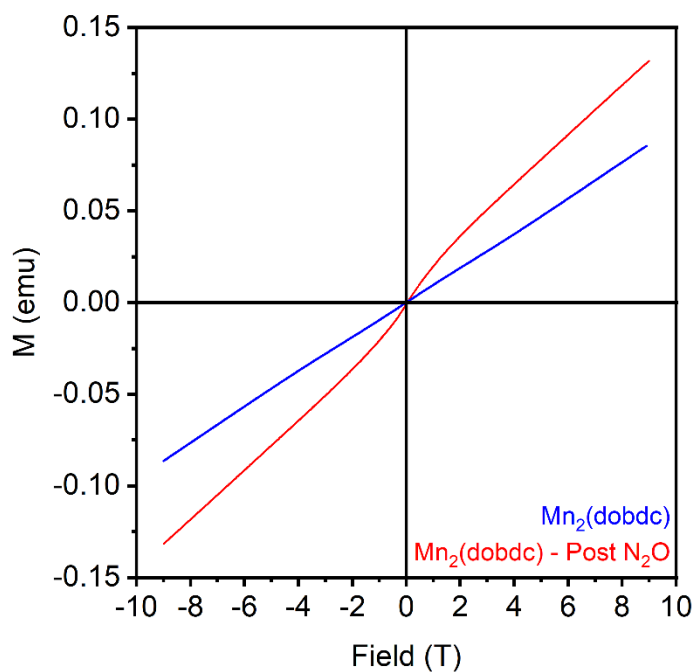

**Figure S82.** Moment vs field measurements collected at 5 K on  $\text{Mn}_2(\text{dobdc})$  before (blue) and after (red) treatment with  $\text{N}_2\text{O}$  at  $300\text{ }^\circ\text{C}$ .

## 16. References

- (1) Dietzel, P. D. C.; Johnsen, R. E.; Blom, R.; Fjellvåg, H. Structural Changes and Coordinatively Unsaturated Metal Atoms on Dehydration of Honeycomb Analogous Microporous Metal–Organic Frameworks. *Chem. Eur. J.* **2008**, *14* (8), 2389–2397. <https://doi.org/10.1002/chem.200701370>.
- (2) Denysenko, D.; Grzywa, M.; Tonigold, M.; Streppel, B.; Krkljus, I.; Hirscher, M.; Mugnaioli, E.; Kolb, U.; Hanss, J.; Volkmer, D. Elucidating Gating Effects for Hydrogen Sorption in MFU-4-Type Triazolate-Based Metal–Organic Frameworks Featuring Different Pore Sizes. *Chem. Eur. J.* **2011**, *17* (6), 1837–1848. <https://doi.org/10.1002/chem.201001872>.
- (3) Chichak, K.; Jacquemard, U.; Branda, N. R. The Construction of (Salophen)Ruthenium(II) Assemblies Using Axial Coordination. *Eur. J. Inorg. Chem.* **2002**, *2002* (2), 357–368. [https://doi.org/10.1002/1099-0682\(20022\)2002:2<357::AID-EJIC357>3.0.CO;2-T](https://doi.org/10.1002/1099-0682(20022)2002:2<357::AID-EJIC357>3.0.CO;2-T).
- (4) Rieth, A. J.; Tulchinsky, Y.; Dincă, M. High and Reversible Ammonia Uptake in Mesoporous Azolate Metal–Organic Frameworks with Open Mn, Co, and Ni Sites. *J. Am. Chem. Soc.* **2016**, *138* (30), 9401–9404. <https://doi.org/10.1021/jacs.6b05723>.
- (5) Rieth, A. J.; Wright, A. M.; Skorupskii, G.; Mancuso, J. L.; Hendon, C. H.; Dincă, M. Record-Setting Sorbents for Reversible Water Uptake by Systematic Anion Exchanges in Metal–Organic Frameworks. *J. Am. Chem. Soc.* **2019**, *141* (35), 13858–13866. <https://doi.org/10.1021/jacs.9b06246>.
- (6) Park, S. S.; Tulchinsky, Y.; Dincă, M. Single-Ion Li<sup>+</sup>, Na<sup>+</sup>, and Mg<sup>2+</sup> Solid Electrolytes Supported by a Mesoporous Anionic Cu–Azolate Metal–Organic Framework. *J. Am. Chem. Soc.* **2017**, *139* (38), 13260–13263. <https://doi.org/10.1021/jacs.7b06197>.
- (7) Zick, M. E.; Lee, J.-H.; Gonzalez, M. I.; Velasquez, E. O.; Uliana, A. A.; Kim, J.; Long, J. R.; Milner, P. J. Fluoroarene Separations in Metal–Organic Frameworks with Two Proximal Mg<sup>2+</sup> Coordination Sites. *J. Am. Chem. Soc.* **2021**, *143* (4), 1948–1958. <https://doi.org/10.1021/jacs.0c11530>.
- (8) Queen, W. L.; Hudson, M. R.; Bloch, E. D.; Mason, J. A.; Gonzalez, M. I.; Lee, J. S.; Gygi, D.; Howe, J. D.; Lee, K.; Darwish, T. A.; James, M.; Peterson, V. K.; Teat, S. J.; Smit, B.; Neaton, J. B.; Long, J. R.; Brown, C. M. Comprehensive Study of Carbon Dioxide Adsorption in the Metal–Organic Frameworks M<sub>2</sub>(dobdc) (M = Mg, Mn, Fe, Co, Ni, Cu, Zn). *Chem. Sci.* **2014**, *5* (12), 4569–4581. <https://doi.org/10.1039/C4SC02064B>.
- (9) Zhou, W.; Wu, H.; Yildirim, T. Enhanced H<sub>2</sub> Adsorption in Isostructural Metal–Organic Frameworks with Open Metal Sites: Strong Dependence of the Binding Strength on Metal Ions. *J. Am. Chem. Soc.* **2008**, *130* (46), 15268–15269. <https://doi.org/10.1021/ja807023q>.
- (10) Geier, S. J.; Mason, J. A.; Bloch, E. D.; Queen, W. L.; Hudson, M. R.; Brown, C. M.; Long, J. R. Selective Adsorption of Ethylene over Ethane and Propylene over Propane in the Metal–Organic Frameworks M<sub>2</sub>(dobdc) (M = Mg, Mn, Fe, Co, Ni, Zn). *Chem. Sci.* **2013**, *4* (5), 2054–2061. <https://doi.org/10.1039/c3sc00032j>.
- (11) Bloch, E. D.; Murray, L. J.; Queen, W. L.; Chavan, S.; Maximoff, S. N.; Bigi, J. P.; Krishna, R.; Peterson, V. K.; Grandjean, F.; Long, G. J.; Smit, B.; Bordiga, S.; Brown, C. M.; Long, J. R. Selective Binding of O<sub>2</sub> over N<sub>2</sub> in a Redox–Active Metal–Organic Framework with Open Iron(II) Coordination Sites. *J. Am. Chem. Soc.* **2011**, *133* (37), 14814–14822. <https://doi.org/10.1021/ja205976v>.
- (12) Xiao, D. J.; Bloch, E. D.; Mason, J. A.; Queen, W. L.; Hudson, M. R.; Planas, N.; Borycz, J.; Dzubak, A. L.; Verma, P.; Lee, K.; Bonino, F.; Crocellà, V.; Yano, J.; Bordiga, S.; Truhlar,

- D. G.; Gagliardi, L.; Brown, C. M.; Long, J. R. Oxidation of Ethane to Ethanol by N<sub>2</sub>O in a Metal–Organic Framework with Coordinatively Unsaturated Iron(II) Sites. *Nat. Chem.* **2014**, *6* (7), 590–595. <https://doi.org/10.1038/nchem.1956>.
- (13) Gonzalez, M. I.; Kapelewski, M. T.; Bloch, E. D.; Milner, P. J.; Reed, D. A.; Hudson, M. R.; Mason, J. A.; Barin, G.; Brown, C. M.; Long, J. R. Separation of Xylene Isomers through Multiple Metal Site Interactions in Metal–Organic Frameworks. *J. Am. Chem. Soc.* **2018**, *140* (9), 3412–3422. <https://doi.org/10.1021/jacs.7b13825>.
- (14) Mason, J. A.; Veenstra, M.; Long, J. R. Evaluating Metal–Organic Frameworks for Natural Gas Storage. *Chem. Sci.* **2014**, *5* (1), 32–51. <https://doi.org/10.1039/C3SC52633J>.
- (15) Neese, F. The ORCA Program System. *WIREs Comput Mol Sci* **2012**, *2* (1), 73–78. <https://doi.org/10.1002/wcms.81>.
- (16) Becke, A. D. Density-Functional Thermochemistry. III. The Role of Exact Exchange. *J. Chem. Phys.* **1993**, *98* (7), 5648–5652. <https://doi.org/10.1063/1.464913>.
- (17) Grimme, S.; Antony, J.; Ehrlich, S.; Krieg, H. A Consistent and Accurate *Ab Initio* Parametrization of Density Functional Dispersion Correction (DFT-D) for the 94 Elements H–Pu. *J. Chem. Phys.* **2010**, *132* (15), 154104. <https://doi.org/10.1063/1.3382344>.
- (18) Grimme, S.; Ehrlich, S.; Goerigk, L. Effect of the Damping Function in Dispersion Corrected Density Functional Theory. *J. Comput. Chem.* **2011**, *32* (7), 1456–1465. <https://doi.org/10.1002/jcc.21759>.
- (19) Van Lenthe, E.; Ehlers, A.; Baerends, E.-J. Geometry Optimizations in the Zero Order Regular Approximation for Relativistic Effects. *J. Chem. Phys.* **1999**, *110* (18), 8943–8953. <https://doi.org/10.1063/1.478813>.
- (20) Weigend, F.; Ahlrichs, R. Balanced Basis Sets of Split Valence, Triple Zeta Valence and Quadruple Zeta Valence Quality for H to Rn: Design and Assessment of Accuracy. *Phys. Chem. Chem. Phys.* **2005**, *7* (18), 3297. <https://doi.org/10.1039/b508541a>.
- (21) Neese, F.; Wennmohs, F.; Hansen, A.; Becker, U. Efficient, Approximate and Parallel Hartree–Fock and Hybrid DFT Calculations. A ‘Chain-of-Spheres’ Algorithm for the Hartree–Fock Exchange. *Chemical Physics* **2009**, *356* (1–3), 98–109. <https://doi.org/10.1016/j.chemphys.2008.10.036>.
- (22) Neese, F. Definition of Corresponding Orbitals and the Diradical Character in Broken Symmetry DFT Calculations on Spin Coupled Systems. *Journal of Physics and Chemistry of Solids* **2004**, *65* (4), 781–785. <https://doi.org/10.1016/j.jpcs.2003.11.015>.
- (23) Henkelman, G.; Uberuaga, B. P.; Jónsson, H. A Climbing Image Nudged Elastic Band Method for Finding Saddle Points and Minimum Energy Paths. *J. Chem. Phys.* **2000**, *113* (22), 9901–9904. <https://doi.org/10.1063/1.1329672>.
- (24) Halbach, R. L.; Gygi, D.; Bloch, E. D.; Anderson, B. L.; Nocera, D. G. Structurally Characterized Terminal Manganese(IV) Oxo Tris(Alkoxide) Complex. *Chem. Sci.* **2018**, *9* (19), 4524–4528. <https://doi.org/10.1039/C8SC01164H>.
